# Supplementary material for: In silico COSMO-RS predictive screening of ionic liquids for the dissolution of plastic
Source: Royal Society of Chemistry journal article supplement (doi:10.1039/d1gc03464b), 2022-01-01
Supplement: d1gc03464b1.pdf [file d1gc03464b1.pdf]

# **In-silico COSMO-RS Predictive Screening of Ionic Liquids for the Dissolution of Plastic**

Mood Mohan<sup>1,2</sup>, Jay Keasling<sup>1,3,4,5,6,7,8</sup>, Blake A. Simmons<sup>1,3</sup>, Seema Singh<sup>\*,1,2</sup>

<sup>1</sup> Deconstruction Division, Joint BioEnergy Institute, 5885 Hollis Street, Emeryville, California 94608, United States.

<sup>2</sup> Department of Biomass Science and Conversion Technology, Sandia National Laboratories, 7011 East Avenue, Livermore, California 94551, United States.

<sup>3</sup> Biological Systems and Engineering Division, Lawrence Berkeley National Laboratory, 1 Cyclotron Road, Berkeley, California 94720, United States.

<sup>4</sup> QB3 Institute, University of California, Berkeley, California, 94720, United States

<sup>5</sup> Department of Bioengineering, University of California, Berkeley, California, 94720, United States

<sup>6</sup> Department of Chemical and Biomolecular Engineering, University of California, Berkeley, California, 94720, United States

<sup>7</sup> Novo Nordisk Foundation Center for Biosustainability, Technical University of Denmark, Building 220, Kemitorvet, DK-2800, Kgs, Lyngby, Denmark

<sup>8</sup> Center for Synthetic Biochemistry, Shenzhen Institutes for Advanced Technologies, Shenzhen, Guangdong, 518055, China

## **Corresponding Authors**

\* E-mail: [ssingh@lbl.gov](mailto:ssingh@lbl.gov); [seesing@sandia.gov](mailto:seesing@sandia.gov) (Seema Singh)

**Table S1.** List of cations used in this work

| Sl. No. | Name of the cation and Acronym                                      | Chem. Formula / mol. wt.                                              | Chemical structure                                                                    |
|---------|---------------------------------------------------------------------|-----------------------------------------------------------------------|---------------------------------------------------------------------------------------|
| 1.      | Acetylcholine<br>[ACh] <sup>+</sup>                                 | C <sub>7</sub> H <sub>16</sub> NO <sub>2</sub> <sup>+</sup><br>146.21 | 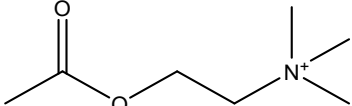   |
| 2.      | Benzyltrimethylammonium<br>[BzTMA] <sup>+</sup>                     | C <sub>10</sub> H <sub>16</sub> N <sup>+</sup><br>150.24              |    |
| 3.      | Cholinium<br>[Ch] <sup>+</sup>                                      | C <sub>5</sub> H <sub>14</sub> NO <sup>+</sup><br>104.17              |    |
| 4.      | Diethylmethyl(2-methoxyethyl)ammonium<br>[DEM-2-MeoEA] <sup>+</sup> | C <sub>8</sub> H <sub>20</sub> NO <sup>+</sup><br>146.25              |    |
| 5.      | Ethyl dimethylpropylammonium<br>[EDMPrA] <sup>+</sup>               | C <sub>7</sub> H <sub>18</sub> N <sup>+</sup><br>116.23               |    |
| 6.      | Methyltrioctylammonium<br>[MTOA] <sup>+</sup>                       | C <sub>25</sub> H <sub>54</sub> N <sup>+</sup><br>368.71              |   |
| 7.      | Tetrabutylammonium<br>[TeBA] <sup>+</sup>                           | C <sub>16</sub> H <sub>36</sub> N <sup>+</sup><br>242.47              |  |
| 8.      | Tetraethylammonium<br>[TeEA] <sup>+</sup>                           | C <sub>8</sub> H <sub>20</sub> N <sup>+</sup><br>130.25               |  |
| 9.      | Tetramethylammonium<br>[TeMA] <sup>+</sup>                          | C <sub>4</sub> H <sub>12</sub> N <sup>+</sup><br>74.15                |  |
| 10.     | Triethylmethylammonium<br>[TEMA] <sup>+</sup>                       | C <sub>7</sub> H <sub>18</sub> N <sup>+</sup><br>116.23               |  |

|     |                                                          |                                                                       |                                                                                       |
|-----|----------------------------------------------------------|-----------------------------------------------------------------------|---------------------------------------------------------------------------------------|
| 11. | Vinylbenzyltrimethylammonium<br>[VBeTMA] <sup>+</sup>    | C <sub>12</sub> H <sub>18</sub> N <sup>+</sup><br>176.28              | 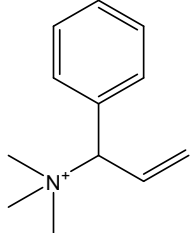   |
| 12. | 1,3-dimethylimidazolium<br>[DMIM] <sup>+</sup>           | C <sub>5</sub> H <sub>9</sub> N <sub>2</sub> <sup>+</sup><br>97.14    |    |
| 13. | 1-allyl-3-methylimidazolium<br>[AMIM] <sup>+</sup>       | C <sub>7</sub> H <sub>11</sub> N <sub>2</sub> <sup>+</sup><br>123.18  |    |
| 14. | 1-benzyl-3-butylimidazolium<br>[BzBIM] <sup>+</sup>      | C <sub>14</sub> H <sub>19</sub> N <sub>2</sub> <sup>+</sup><br>215.32 |    |
| 15. | 1-benzyl-3-methylimidazolium<br>[BzMIM] <sup>+</sup>     | C <sub>11</sub> H <sub>13</sub> N <sub>2</sub> <sup>+</sup><br>173.24 |    |
| 16. | 1-butyl-2,3-dimethylimidazolium<br>[BDMIM] <sup>+</sup>  | C <sub>9</sub> H <sub>17</sub> N <sub>2</sub> <sup>+</sup><br>153.25  |   |
| 17. | 1-butyl-3-methylimidazolium<br>[BMIM] <sup>+</sup>       | C <sub>8</sub> H <sub>15</sub> N <sub>2</sub> <sup>+</sup><br>139.22  |  |
| 18. | 1-butylimidazolium<br>[1-BIM] <sup>+</sup>               | C <sub>7</sub> H <sub>13</sub> N <sub>2</sub> <sup>+</sup><br>125.19  |  |
| 19. | 1-ethyl-2,3-dimethylimidazolium<br>[EDMIM] <sup>+</sup>  | C <sub>7</sub> H <sub>13</sub> N <sub>2</sub> <sup>+</sup><br>125.19  |  |
| 20. | 1-ethyl-3-methylbenzimidazolium<br>[EMBzIM] <sup>+</sup> | C <sub>10</sub> H <sub>13</sub> N <sub>2</sub> <sup>+</sup><br>161.23 |  |

|     |                                                                         |                                                                       |  |
|-----|-------------------------------------------------------------------------|-----------------------------------------------------------------------|--|
| 21. | 1-ethyl-3-methylimidazolium<br>[EMIM] <sup>+</sup>                      | C <sub>6</sub> H <sub>11</sub> N <sub>2</sub> <sup>+</sup><br>111.17  |  |
| 22. | 1-hexyl-3-methylimidazolium<br>[HMIM] <sup>+</sup>                      | C <sub>10</sub> H <sub>19</sub> N <sub>2</sub> <sup>+</sup><br>167.28 |  |
| 23. | 1-octyl-3-methylimidazolium<br>[OMIM] <sup>+</sup>                      | C <sub>12</sub> H <sub>23</sub> N <sub>2</sub> <sup>+</sup><br>195.33 |  |
| 24. | 1-propyl-3-methylimidazolium<br>[PMIM] <sup>+</sup>                     | C <sub>7</sub> H <sub>13</sub> N <sub>2</sub> <sup>+</sup><br>125.19  |  |
| 25. | 1,2-dimethyl-3-ethylimidazolium<br>[DMEIM] <sup>+</sup>                 | C <sub>7</sub> H <sub>13</sub> N <sub>2</sub> <sup>+</sup><br>125.19  |  |
| 26. | 1,3-diisopropylimidazolium<br>[DIsoPIM] <sup>+</sup>                    | C <sub>9</sub> H <sub>17</sub> N <sub>2</sub> <sup>+</sup><br>153.25  |  |
| 27. | 2-tert-Butyl-1,1,3,3-tetramethylguanidinium<br>[tBTMGH] <sup>+</sup>    | C <sub>9</sub> H <sub>22</sub> N <sub>3</sub> <sup>+</sup><br>172.30  |  |
| 28. | 7-ethyl-1,5,7-triazabicyclo(4.4.0)dec-5-ene<br>[ETBDH] <sup>+</sup>     | C <sub>9</sub> H <sub>18</sub> N <sub>3</sub> <sup>+</sup><br>168.26  |  |
| 29. | 7-isopropyl-1,5,7-triazabicyclo[4.4.0]dec-5-ene<br>[ITBDH] <sup>+</sup> | C <sub>10</sub> H <sub>20</sub> N <sub>3</sub> <sup>+</sup><br>182.29 |  |
| 30. | 7-methyl-1,5,7-triazabicyclo[4.4.0]dec-5-ene<br>[MTBDH] <sup>+</sup>    | C <sub>8</sub> H <sub>16</sub> N <sub>3</sub> <sup>+</sup><br>154.24  |  |
| 31. | 1,2-dimethyl-1,4,5,6-tetrahydropyrimidine<br>[DMPH] <sup>+</sup>        | C <sub>6</sub> H <sub>13</sub> N <sub>2</sub> <sup>+</sup><br>113.18  |  |

|     |                                                               |                                                                       |  |
|-----|---------------------------------------------------------------|-----------------------------------------------------------------------|--|
| 32. | 1,5-diazabicyclo[4.3.0]non-5-ene<br>[DBNH] <sup>+</sup>       | C <sub>7</sub> H <sub>13</sub> N <sub>2</sub> <sup>+</sup><br>125.19  |  |
| 33. | 1,8-bis(dimethylamino)naphthalene<br>[DMANH] <sup>+</sup>     | C <sub>14</sub> H <sub>19</sub> N <sub>2</sub> <sup>+</sup><br>215.32 |  |
| 34. | 1,8-diazabicyclo[5.4.0]undec-7-ene<br>[DBUH] <sup>+</sup>     | C <sub>9</sub> H <sub>17</sub> N <sub>2</sub> <sup>+</sup><br>153.25  |  |
| 35. | 1,5,7-triazabicyclo[4.4.0]dec-5-ene<br>[TBDH] <sup>+</sup>    | C <sub>7</sub> H <sub>14</sub> N <sub>3</sub> <sup>+</sup><br>140.21  |  |
| 36. | 1,1,3,3-tetramethylguanidine<br>[TMGH] <sup>+</sup>           | C <sub>5</sub> H <sub>14</sub> N <sub>3</sub> <sup>+</sup><br>116.19  |  |
| 37. | 1,2,2,6,6-pentamethyl-4-piperidinol<br>[PeMPipH] <sup>+</sup> | C <sub>10</sub> H <sub>22</sub> NO <sup>+</sup><br>172.29             |  |
| 38. | N,N-dimethyl-1-adamantylamine<br>[DMAAH] <sup>+</sup>         | C <sub>12</sub> H <sub>22</sub> N <sup>+</sup><br>180.31              |  |
| 39. | 1-alkyl quinazolinium<br>[AQunz] <sup>+</sup>                 | C <sub>9</sub> H <sub>9</sub> N <sub>2</sub> <sup>+</sup><br>145.18   |  |
| 40. | 1-butyl-1-methylpiperidinium<br>[BMPip] <sup>+</sup>          | C <sub>10</sub> H <sub>22</sub> N <sup>+</sup><br>156.29              |  |

|     |                                                                 |                                                                       |  |
|-----|-----------------------------------------------------------------|-----------------------------------------------------------------------|--|
| 41. | 4-amino-1-butyl-1,2,4-triazolium<br>[4AB124Tz] <sup>+</sup>     | C <sub>6</sub> H <sub>13</sub> N <sub>4</sub> <sup>+</sup><br>141.20  |  |
| 42. | 1-ethyl-1-methylpiperidinium<br>[EMPip] <sup>+</sup>            | C <sub>8</sub> H <sub>18</sub> N <sup>+</sup><br>128.24               |  |
| 43. | 1-ethyl-3-methylbenzotriazolium<br>[EMBzTz] <sup>+</sup>        | C <sub>9</sub> H <sub>12</sub> N <sub>3</sub> <sup>+</sup><br>162.22  |  |
| 44. | 1-ethylquinolinium<br>[1-EQ] <sup>+</sup>                       | C <sub>11</sub> H <sub>12</sub> N <sup>+</sup><br>158.22              |  |
| 45. | 1-methylquinolinium<br>[1-MQ] <sup>+</sup>                      | C <sub>10</sub> H <sub>10</sub> N <sup>+</sup><br>144.20              |  |
| 46. | 4-amino-1-octyl-1,2,4-triazolium<br>[4AO124Tz] <sup>+</sup>     | C <sub>10</sub> H <sub>21</sub> N <sub>4</sub> <sup>+</sup><br>197.31 |  |
| 47. | 1-octylquinolinium<br>[1-OQ] <sup>+</sup>                       | C <sub>17</sub> H <sub>24</sub> N <sup>+</sup><br>242.39              |  |
| 48. | 4-amino-1-pentyl-1,2,4-triazolium<br>[4AP124Tz] <sup>+</sup>    | C <sub>7</sub> H <sub>15</sub> N <sub>4</sub> <sup>+</sup><br>155.22  |  |
| 49. | 3-methylquinolizinium<br>[3-MQunz] <sup>+</sup>                 | C <sub>10</sub> H <sub>10</sub> N <sup>+</sup><br>144.20              |  |
| 50. | 1,2,4-Triazolium-4-anilino-1-phenyl<br>[4APh124Tz] <sup>+</sup> | C <sub>14</sub> H <sub>13</sub> N <sub>4</sub> <sup>+</sup><br>237.29 |  |

|     |                                                               |                             |                                                                                       |
|-----|---------------------------------------------------------------|-----------------------------|---------------------------------------------------------------------------------------|
| 51. | Diethylbutylsulfonium<br>[DEBS] <sup>+</sup>                  | $C_8H_{19}S^+$<br>147.30    | 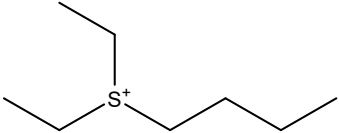   |
| 52. | Diethylmethylsulfonium<br>[DEMS] <sup>+</sup>                 | $C_5H_{13}S^+$<br>105.22    |    |
| 53. | Quinolizinium<br>[Qunz] <sup>+</sup>                          | $C_9H_8N^+$<br>130.17       |    |
| 54. | Triethylsulfonium<br>[TES] <sup>+</sup>                       | $C_6H_{15}S^+$<br>119.25    |    |
| 55. | Benzyltriphenylphosphonium<br>[BzTPhP] <sup>+</sup>           | $C_{25}H_{22}P^+$<br>353.42 |    |
| 56. | Tetrabutylphosphonium<br>[TeBP] <sup>+</sup>                  | $C_{16}H_{36}P^+$<br>259.44 |   |
| 57. | Tetraethylphosphonium<br>[TeEP] <sup>+</sup>                  | $C_8H_{20}P^+$<br>147.22    |  |
| 58. | Triethylmethylphosphonium<br>[TEMP] <sup>+</sup>              | $C_7H_{18}P^+$<br>133.19    |  |
| 59. | Trimethylbutylphosphonium<br>[TMBP] <sup>+</sup>              | $C_7H_{18}P^+$<br>133.19    |  |
| 60. | (2-hydroxyethyl)trimethylphosphonium<br>[TMEOHP] <sup>+</sup> | $C_5H_{14}OP^+$<br>121.14   |  |
| 61. | Trimethylethylphosphonium<br>[TMEP] <sup>+</sup>              | $C_5H_{14}P^+$<br>105.14    |  |

|     |                                                                      |                                  |                                                                                       |
|-----|----------------------------------------------------------------------|----------------------------------|---------------------------------------------------------------------------------------|
| 62. | Tributylmethylphosphonium<br>[TBMP] <sup>+</sup>                     | $C_{13}H_{30}P^+$<br>217.36      | 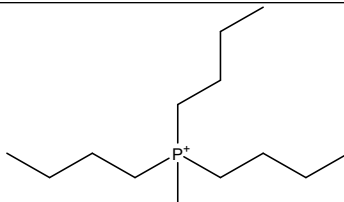   |
| 63. | Trihexyltetradecylphosphonium<br>[THTeDP] <sup>+</sup>               | $C_{32}H_{68}P^+$<br>483.87      |    |
| 64. | 1-(2-ethoxy-2-oxoethyl)-3-methylimidazolium<br>[2EOMIM] <sup>+</sup> | $C_8H_{13}N_2O_2^+$<br>169.20    |    |
| 65. | 1-(3-Sulfopropyl)-2-vinylpyridinium<br>[3SP2VPy] <sup>+</sup>        | $C_{10}H_{14}NO_3S^+$<br>228.29  |    |
| 66. | 1-(4-sulfobutyl)-3-methylimidazolium<br>[4SB3MIM] <sup>+</sup>       | $C_8H_{15}N_2O_3S^+$<br>219.28   |    |
| 67. | 1-carboxymethyl-3-butyylimidazolium<br>[CMBIM] <sup>+</sup>          | $C_9H_{15}N_2O_2^+$<br>183.23    |   |
| 68. | 1-carboxymethyl-3-methylimidazolium<br>[CMMIM] <sup>+</sup>          | $C_6H_9N_2O_2^+$<br>141.15       |  |
| 69. | 1-ethylurea-3-methylimidazolium<br>[EUMIM] <sup>+</sup>              | $C_6H_{11}N_4O^+$<br>155.18      |  |
| 70. | 1-hydroxy-3-methylimidazolium<br>[(OH)MIM] <sup>+</sup>              | $C_4H_7N_2O^+$<br>99.11          |  |
| 71. | 1-methyl-3-(3-carboxyethyl)imidazolium<br>[M33CEIM] <sup>+</sup>     | $C_7H_{11}N_2O_2^+$<br>155.18    |  |
| 72. | 1-vinyl-3-carboxybutylimidazolium<br>[VCBIM] <sup>+</sup>            | $C_{10}H_{15}N_2O_2^+$<br>195.24 |  |



|     |                                                                            |                               |  |
|-----|----------------------------------------------------------------------------|-------------------------------|--|
| 73. | N,N-dimethyl-N-2-(2-hydroxyethoxy)ammonium<br>[DM(2OHE)A] <sup>+</sup>     | $C_6H_{16}NO_2^+$<br>134.20   |  |
| 74. | Triethyl-(3-sulfopropyl)ammonium<br>[TE(3SP)A] <sup>+</sup>                | $C_9H_{22}NO_3S^+$<br>224.34  |  |
| 75. | 2-ethyl-1,1,3,3-tetramethylguanidinium<br>[2ETeG] <sup>+</sup>             | $C_7H_{18}N_3^+$<br>144.24    |  |
| 76. | 1,1,3,3-tetramethylguanidine<br>[TMGH] <sup>+</sup>                        | $C_5H_{14}N_3^+$<br>116.19    |  |
| 77. | Bis(bis(butyl(amino)methylene)dimethylguanidinium<br>[BAMDMG] <sup>+</sup> | $C_{20}H_{44}N_5^+$<br>354.61 |  |
| 78. | Guanidinium<br>[C(NH2)3] <sup>+</sup>                                      | $CH_6N_3^+$<br>60.08          |  |
| 79. | Hexamethylguanidinium<br>[HMG] <sup>+</sup>                                | $C_7H_{18}N_3^+$<br>144.24    |  |
| 80. | N,N,N,N-tetramethyl-N,N-dibutylguanidinium<br>[TeMDBG] <sup>+</sup>        | $C_{13}H_{30}N_3^+$<br>228.40 |  |
| 81. | N,N,N,N-tetramethyl-N,N-dioctylguanidinium<br>[TeMDOG] <sup>+</sup>        | $C_{21}H_{46}N_3^+$<br>340.62 |  |

|     |                                                                         |                                                                        |                                                                                       |
|-----|-------------------------------------------------------------------------|------------------------------------------------------------------------|---------------------------------------------------------------------------------------|
| 82. | 1-(2-hydroxyethyl)-2,3-dimethylimidazolium<br>[C2(OH)DMIM] <sup>+</sup> | C <sub>7</sub> H <sub>13</sub> N <sub>2</sub> O <sup>+</sup><br>141.19 | 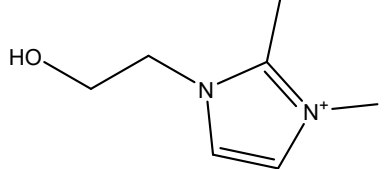   |
| 83. | 1,3-aminopropyl-3-methylimidazolium<br>[APrMIM] <sup>+</sup>            | C <sub>7</sub> H <sub>14</sub> N <sub>3</sub> <sup>+</sup><br>140.21   |    |
| 84. | 1-methyl-3,2-aminoethylimidazolium<br>[MAEIM] <sup>+</sup>              | C <sub>6</sub> H <sub>12</sub> N <sub>3</sub> <sup>+</sup><br>126.18   |    |
| 85. | 1-allyl-3,4-dimethylpyridinium<br>[A34DMPy] <sup>+</sup>                | C <sub>10</sub> H <sub>14</sub> N <sup>+</sup><br>148.23               |    |
| 86. | 1-allyl-3,5-dimethylpyridinium<br>[A35DMPy] <sup>+</sup>                | C <sub>10</sub> H <sub>14</sub> N <sup>+</sup><br>148.23               |    |
| 87. | 1-butyl-3-methylpyridinium<br>[B-3-MPy] <sup>+</sup>                    | C <sub>10</sub> H <sub>16</sub> N <sup>+</sup><br>150.24               |   |
| 88. | 1-butyl-4-methylpyridinium<br>[B-4-MPy] <sup>+</sup>                    | C <sub>10</sub> H <sub>16</sub> N <sup>+</sup><br>150.24               |  |
| 89. | 1-butylpyridinium<br>[BPy] <sup>+</sup>                                 | C <sub>9</sub> H <sub>14</sub> N <sup>+</sup><br>136.22                |  |
| 90. | 1-ethylpyridinium<br>[EPy] <sup>+</sup>                                 | C <sub>7</sub> H <sub>10</sub> N <sup>+</sup><br>108.16                |  |
| 91. | 1-hexylpyridinium<br>[HPy] <sup>+</sup>                                 | C <sub>11</sub> H <sub>18</sub> N <sup>+</sup><br>164.27               |  |
| 92. | 1-octylpyridinium<br>[OPy] <sup>+</sup>                                 | C <sub>13</sub> H <sub>22</sub> N <sup>+</sup><br>192.33               |  |
| 93. | 1,1-dimethylpyrrolidinium<br>[DMPyrr] <sup>+</sup>                      | C <sub>6</sub> H <sub>14</sub> N <sup>+</sup><br>100.18                |  |

|     |                                                                           |                                                          |                                                                                      |
|-----|---------------------------------------------------------------------------|----------------------------------------------------------|--------------------------------------------------------------------------------------|
| 94. | 1,1-dipropylpyrrolidinium<br>[DprPyrr] <sup>+</sup>                       | C <sub>10</sub> H <sub>22</sub> N <sup>+</sup><br>156.29 | 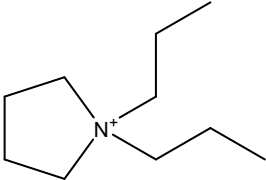  |
| 95. | 1-(2-methoxyethyl)-1-methylpyrrolidinium<br>[12MeoEMPyrr] <sup>+</sup>    | C <sub>8</sub> H <sub>18</sub> NO <sup>+</sup><br>144.24 |   |
| 96. | 1-butyl-1-ethylpyrrolidinium<br>[BEPyrr] <sup>+</sup>                     | C <sub>10</sub> H <sub>22</sub> N <sup>+</sup><br>156.29 |   |
| 97. | 1-ethyl-1-methylpyrrolidinium<br>[EMPyrr] <sup>+</sup>                    | C <sub>7</sub> H <sub>16</sub> N <sup>+</sup><br>114.21  |   |
| 98. | 1-hexyl-1-methylpyrrolidinium<br>[HMPyrr] <sup>+</sup>                    | C <sub>11</sub> H <sub>24</sub> N <sup>+</sup><br>170.32 |   |
| 99. | 1-methyl-1-(2-methylthioethyl)pyrrolidinium<br>[M12MThEPyrr] <sup>+</sup> | C <sub>8</sub> H <sub>18</sub> NS <sup>+</sup><br>160.30 |  |

**Table S2.** List of anions used in this work

| Sl. No. | Name of the anion and Acronym         | Chem. formula & mol. wt.                                                            | Chemical structure                                                                    |
|---------|---------------------------------------|-------------------------------------------------------------------------------------|---------------------------------------------------------------------------------------|
| 1.      | Alaninate<br>[Ala] <sup>-</sup>       | C <sub>3</sub> H <sub>6</sub> NO <sub>2</sub> <sup>-</sup><br>88.09                 | 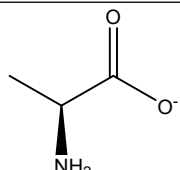   |
| 2.      | Argininate<br>[Arg] <sup>-</sup>      | C <sub>6</sub> H <sub>13</sub> N <sub>4</sub> O <sub>2</sub> <sup>-</sup><br>173.20 |    |
| 3.      | Asparaginate<br>[Aspg] <sup>-</sup>   | C <sub>4</sub> H <sub>7</sub> N <sub>2</sub> O <sub>3</sub> <sup>-</sup><br>131.11  |    |
| 4.      | Cysteinate<br>[Cyst] <sup>-</sup>     | C <sub>3</sub> H <sub>6</sub> NO <sub>2</sub> S <sup>-</sup><br>120.15              |   |
| 5.      | Glutamininate<br>[Glumn] <sup>-</sup> | C <sub>5</sub> H <sub>9</sub> N <sub>2</sub> O <sub>3</sub> <sup>-</sup><br>145.14  |  |
| 6.      | Glycinate<br>[Gly] <sup>-</sup>       | C <sub>2</sub> H <sub>4</sub> NO <sub>2</sub> <sup>-</sup><br>74.06                 |  |
| 7.      | Histidininate<br>[His] <sup>-</sup>   | C <sub>6</sub> H <sub>8</sub> N <sub>3</sub> O <sub>2</sub> <sup>-</sup><br>154.15  |  |
| 8.      | Isoleucinate<br>[Isole] <sup>-</sup>  | C <sub>6</sub> H <sub>12</sub> NO <sub>2</sub> <sup>-</sup><br>130.17               |  |

|     |                                             |                               |                                                                                       |
|-----|---------------------------------------------|-------------------------------|---------------------------------------------------------------------------------------|
| 9.  | Leucinate<br>[Leu] <sup>-</sup>             | $C_6H_{12}NO_2^-$<br>130.17   | 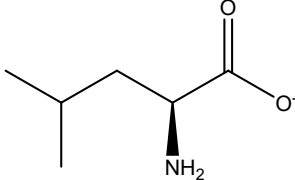   |
| 10. | Lysinate<br>[Lys] <sup>-</sup>              | $C_6H_{13}N_2O_2^-$<br>145.18 |    |
| 11. | Methioninate<br>[Met] <sup>-</sup>          | $C_5H_{10}NO_2S^-$<br>148.20  |    |
| 12. | Phenylalaninate<br>[Phe] <sup>-</sup>       | $C_9H_{10}NO_2^-$<br>164.18   |    |
| 13. | Prolinate<br>[Pro] <sup>-</sup>             | $C_5H_8NO_2^-$<br>114.12      |   |
| 14. | Aspartate monoanion<br>[AspMA] <sup>-</sup> | $C_4H_6NO_4^-$<br>132.10      |  |
| 15. | Glutamate monoanion<br>[GluMA] <sup>-</sup> | $C_5H_8NO_4^-$<br>146.12      |  |
| 16. | Serinate<br>[Ser] <sup>-</sup>              | $C_3H_6NO_3^-$<br>104.09      |  |

|     |                                                        |                                  |                                                                                       |
|-----|--------------------------------------------------------|----------------------------------|---------------------------------------------------------------------------------------|
| 17. | Threoninate<br>[Thr] <sup>-</sup>                      | $C_4H_8NO_3^-$<br>118.11         | 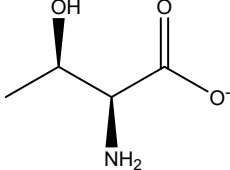   |
| 18. | Tryptophanate<br>[Try] <sup>-</sup>                    | $C_{11}H_{11}N_2O_2^-$<br>203.22 |    |
| 19. | Tyrosinate<br>[Tyro] <sup>-</sup>                      | $C_9H_{10}NO_3^-$<br>180.18      |    |
| 20. | Valinate<br>[Val] <sup>-</sup>                         | $C_5H_{10}NO_2^-$<br>116.14      |   |
| 21. | 2-Aminoimidazolate<br>[2AIm] <sup>-</sup>              | $C_4H_4N_3O_2^-$<br>126.10       |  |
| 22. | 2-methylimidazolate<br>[2MIm] <sup>-</sup>             | $C_5H_5N_2O_2^-$<br>125.11       |  |
| 23. | 4,5-Dichloroimidazolate<br>[45DCIm] <sup>-</sup>       | $C_4HCl_2N_2O_2^-$<br>179.96     |  |
| 24. | 5,6-Dimethylbenzimidazolate<br>[56DMBeIm] <sup>-</sup> | $C_{10}H_9N_2O_2^-$<br>189.19    |  |

|     |                                                        |                               |                                                                                       |
|-----|--------------------------------------------------------|-------------------------------|---------------------------------------------------------------------------------------|
| 25. | Benzimidazolate<br>[BeIm] <sup>-</sup>                 | $C_8H_5N_2O_2^-$<br>161.14    | 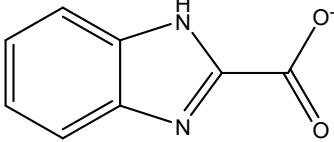   |
| 26. | Saccharinate<br>[Sac] <sup>-</sup>                     | $C_7H_4NO_3S^-$<br>182.17     |    |
| 27. | (E)-2-Methylbut-2-enoate<br>[2-Mbut] <sup>-</sup>      | $C_5H_7O_2^-$<br>99.11        |    |
| 28. | 2-(Bromomethyl)acrylate<br>[2-BrMAcr] <sup>-</sup>     | $C_4H_4BrO_2^-$<br>163.98     |    |
| 29. | 2-butyl octanoate<br>[2-BOA] <sup>-</sup>              | $C_{12}H_{23}O_2^-$<br>199.31 |   |
| 30. | Chloroacetate<br>[2-ClAce] <sup>-</sup>                | $C_2H_2ClO_2^-$<br>93.49      |  |
| 31. | 2-ethyl butyrate<br>[2-EBA] <sup>-</sup>               | $C_6H_{11}O_2^-$<br>115.15    |  |
| 32. | 2-ethyl hexanoate<br>[2-EHA] <sup>-</sup>              | $C_8H_{15}O_2^-$<br>143.21    |  |
| 33. | 2-hexyl octanoate<br>[2-HOA] <sup>-</sup>              | $C_{14}H_{27}O_2^-$<br>227.37 |  |
| 34. | 2-(hydroxymethyl)acrylate<br>[2-(OH)MAcr] <sup>-</sup> | $C_4H_5O_3^-$<br>101.08       |  |

|     |                                                              |                               |                                                                                       |
|-----|--------------------------------------------------------------|-------------------------------|---------------------------------------------------------------------------------------|
| 35. | 2,2-dimethylbutyrate<br>[22-DMB] <sup>-</sup>                | $C_6H_{11}O_2^-$<br>115.15    | 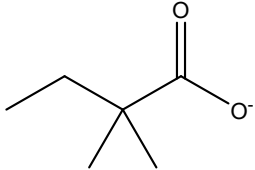   |
| 36. | 3-hydroxy-2-methylenebutyrate<br>[3-(OH)2-MBut] <sup>-</sup> | $C_5H_7O_3^-$<br>115.11       |    |
| 37. | 4-ethyl octanoate<br>[4-EOA] <sup>-</sup>                    | $C_{10}H_{19}O_2^-$<br>171.26 |    |
| 38. | Abietate<br>[Abt] <sup>-</sup>                               | $C_{20}H_{29}O_2^-$<br>301.45 |   |
| 39. | Acetate<br>[Ace] <sup>-</sup>                                | $C_2H_3O_2^-$<br>59.04        |  |
| 40. | Acetylsalicylate<br>[AceSal] <sup>-</sup>                    | $C_9H_7O_4^-$<br>179.15       |  |
| 41. | Acrylate<br>[Acryl] <sup>-</sup>                             | $C_3H_3O_2^-$<br>71.06        |  |
| 42. | Benzoate<br>[Benzoate] <sup>-</sup>                          | $C_7H_5O_2^-$<br>121.12       |  |



|     |                                                |                               |                                                                                       |
|-----|------------------------------------------------|-------------------------------|---------------------------------------------------------------------------------------|
| 43. | Butyrate<br>[But] <sup>-</sup>                 | $C_4H_7O_2^-$<br>87.10        | 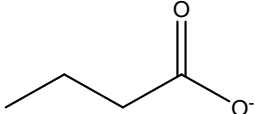   |
| 44. | Coumarine-3-carboxylate<br>[C3C] <sup>-</sup>  | $C_{10}H_5O_4^-$<br>189.15    |    |
| 45. | Crotonate<br>[Crotonate] <sup>-</sup>          | $C_4H_5O_2^-$<br>85.08        |    |
| 46. | Decanoate<br>[Dec] <sup>-</sup>                | $C_{10}H_{19}O_2^-$<br>171.26 |    |
| 47. | Formate<br>[For] <sup>-</sup>                  | $CHO_2^-$<br>45.02            |    |
| 48. | Gentisate<br>[Gen] <sup>-</sup>                | $C_7H_5O_4^-$<br>153.11       |   |
| 49. | Glycolate<br>[Glyco] <sup>-</sup>              | $C_2H_3O_3^-$<br>75.04        |  |
| 50. | Hexanoate<br>[Hex] <sup>-</sup>                | $C_6H_{11}O_2^-$<br>115.15    |  |
| 51. | Imidazole-2-carboxylate<br>[Im2C] <sup>-</sup> | $C_4H_3N_2O_2^-$<br>111.08    |  |
| 52. | Indole-3-acetate<br>[I3A] <sup>-</sup>         | $C_{10}H_8NO_2^-$<br>174.18   |  |

|     |                                           |                            |                                                                                       |
|-----|-------------------------------------------|----------------------------|---------------------------------------------------------------------------------------|
| 53. | Lactate<br>[Lac] <sup>-</sup>             | $C_3H_5O_3^-$<br>89.07     | 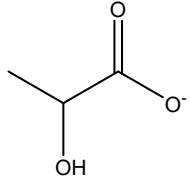   |
| 54. | Methyl carbonate<br>[MCb] <sup>-</sup>    | $C_2H_3O_3^-$<br>75.04     |    |
| 55. | N-methylcarbamate<br>[N-MCb] <sup>-</sup> | $C_2H_4NO_2^-$<br>74.06    |    |
| 56. | N-methyloxamate<br>[NMeO] <sup>-</sup>    | $C_3H_4NO_3^-$<br>102.07   |    |
| 57. | Octanoate<br>[Oct] <sup>-</sup>           | $C_8H_{15}O_2^-$<br>143.21 |    |
| 58. | Oxamate<br>[Oxa] <sup>-</sup>             | $C_2H_2NO_3^-$<br>88.04    |   |
| 59. | Propionate<br>[Prop] <sup>-</sup>         | $C_3H_5O_2^-$<br>73.07     |  |
| 60. | Salicylate<br>[Sal] <sup>-</sup>          | $C_7H_5O_3^-$<br>137.11    |  |
| 61. | Thiosalicylate<br>[ThioSal] <sup>-</sup>  | $C_7H_5O_2S^-$<br>153.18   |  |

|     |                                                                             |                                |                                                                                       |
|-----|-----------------------------------------------------------------------------|--------------------------------|---------------------------------------------------------------------------------------|
| 62. | Trifluoroacetate<br>[TFA] <sup>-</sup>                                      | $C_2F_3O_2^-$<br>113.02        | 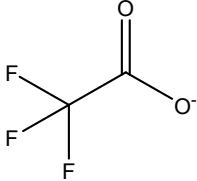   |
| 63. | 2,2,2-trifluoro-N-(trifluoromethylsulfonyl)acetamide<br>[TSAC] <sup>-</sup> | $C_3F_6NO_3S^-$<br>244.09      |    |
| 64. | Bis(pentafluoroethylsulfonyl)imide<br>[B(F <sub>5</sub> )SI] <sup>-</sup>   | $C_4F_{10}NO_4S_2^-$<br>380.15 |    |
| 65. | Bis(methanesulfonyl)amide<br>[MSA] <sup>-</sup>                             | $C_2H_6NO_4S_2^-$<br>172.19    |    |
| 66. | Bis(trifluoromethylsulfonyl)imide<br>[TFMI] <sup>-</sup>                    | $C_2F_6NO_4S_2^-$<br>280.14    |   |
| 67. | Dicyanamide<br>[DCN] <sup>-</sup>                                           | $C_2N_3^-$<br>66.04            |  |
| 68. | Hexafluoroantimonate<br>[SbF <sub>6</sub> ] <sup>-</sup>                    | $F_6Sb^-$<br>235.75            |  |
| 69. | Hexafluorophosphate<br>[PF <sub>6</sub> ] <sup>-</sup>                      | $F_6P^-$<br>144.96             |  |
| 70. | Nitrate<br>[NO <sub>3</sub> ] <sup>-</sup>                                  | $NO_3^-$<br>62.00              |  |
| 71. | Oxypentafluorotungstate<br>[WOF <sub>5</sub> ] <sup>-</sup>                 | $F_5OW^-$<br>294.83            |  |

|     |                                                                |                                                                                    |                                                                                       |
|-----|----------------------------------------------------------------|------------------------------------------------------------------------------------|---------------------------------------------------------------------------------------|
| 72. | Phenolate<br>[Phenolate] <sup>-</sup>                          | C <sub>6</sub> H <sub>5</sub> O <sup>-</sup><br>93.11                              | 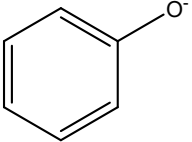   |
| 73. | Tetrafluoroborate<br>[BF <sub>4</sub> ] <sup>-</sup>           | BF <sub>4</sub> <sup>-</sup><br>86.80                                              |    |
| 74. | Thiocyanate<br>[SCN] <sup>-</sup>                              | CNS-<br>58.08                                                                      |    |
| 75. | Thiophenolate<br>[PhS] <sup>-</sup>                            | C <sub>6</sub> H <sub>5</sub> S <sup>-</sup><br>109.17                             |    |
| 76. | tri(trifluoromethylsulfonyl)methide<br>[TFMSM] <sup>-</sup>    | C <sub>4</sub> F <sub>9</sub> O <sub>6</sub> S <sub>3</sub> <sup>-</sup><br>411.20 |   |
| 77. | Tricynamide<br>[TCN] <sup>-</sup>                              | C <sub>4</sub> N <sub>3</sub> <sup>-</sup><br>90.07                                |  |
| 78. | Dibutyl phosphate<br>[DBPO <sub>4</sub> ] <sup>-</sup>         | C <sub>8</sub> H <sub>18</sub> O <sub>4</sub> P <sup>-</sup><br>209.20             |  |
| 79. | Diethylphosphate<br>[DEPO <sub>4</sub> ] <sup>-</sup>          | C <sub>4</sub> H <sub>10</sub> O <sub>4</sub> P <sup>-</sup><br>153.09             |  |
| 80. | Diisopropyl phosphate<br>[DIsoPrPO <sub>4</sub> ] <sup>-</sup> | C <sub>6</sub> H <sub>14</sub> O <sub>4</sub> P <sup>-</sup><br>181.15             |  |

|     |                                                                              |                                                                        |  |
|-----|------------------------------------------------------------------------------|------------------------------------------------------------------------|--|
| 81. | Dimethylphosphate<br>[DMPO <sub>4</sub> ] <sup>-</sup>                       | C <sub>2</sub> H <sub>6</sub> O <sub>4</sub> P <sup>-</sup><br>125.04  |  |
| 82. | 2-(2-methoxyethoxy) ethyl sulfate<br>[22-(ME)OHES] <sup>-</sup>              | C <sub>5</sub> H <sub>11</sub> O <sub>6</sub> S <sup>-</sup><br>199.20 |  |
| 83. | Benzenesulfonate<br>[BenS] <sup>-</sup>                                      | C <sub>6</sub> H <sub>5</sub> O <sub>3</sub> S <sup>-</sup><br>157.16  |  |
| 84. | Ethyl sulfate<br>[EtSO <sub>4</sub> ] <sup>-</sup>                           | C <sub>2</sub> H <sub>5</sub> O <sub>4</sub> S <sup>-</sup><br>125.12  |  |
| 85. | Hexane-1-sulfonate<br>[HSO <sub>3</sub> ] <sup>-</sup>                       | C <sub>6</sub> H <sub>13</sub> O <sub>3</sub> S <sup>-</sup><br>165.23 |  |
| 86. | Hydrogen sulfate<br>[HSO <sub>4</sub> ] <sup>-</sup>                         | HSO <sub>4</sub> <sup>-</sup><br>97.06                                 |  |
| 87. | Metanilate<br>[MetA] <sup>-</sup>                                            | C <sub>6</sub> H <sub>6</sub> NO <sub>3</sub> S <sup>-</sup><br>172.18 |  |
| 88. | Methyl sulfate<br>[MeSO <sub>4</sub> ] <sup>-</sup>                          | CH <sub>3</sub> O <sub>4</sub> S <sup>-</sup><br>111.09                |  |
| 89. | Methylsulfonate<br>[MeSO <sub>3</sub> ] <sup>-</sup>                         | CH <sub>3</sub> O <sub>3</sub> S <sup>-</sup><br>95.09                 |  |
| 90. | Nonafluorobutanesulfonate<br>[F <sub>9</sub> BSO <sub>3</sub> ] <sup>-</sup> | C <sub>4</sub> F <sub>9</sub> O <sub>3</sub> S <sup>-</sup><br>299.09  |  |

|     |                                                              |                                                                        |                                                                                      |
|-----|--------------------------------------------------------------|------------------------------------------------------------------------|--------------------------------------------------------------------------------------|
| 91. | Octane-1-sulfonate<br>[OctSO <sub>3</sub> ] <sup>-</sup>     | C <sub>8</sub> H <sub>17</sub> O <sub>3</sub> S <sup>-</sup><br>193.28 | 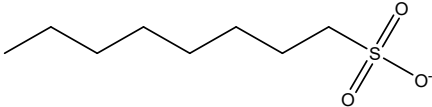  |
| 92. | Sulfamate<br>[NH <sub>2</sub> SO <sub>3</sub> ] <sup>-</sup> | H <sub>2</sub> NO <sub>3</sub> S <sup>-</sup><br>96.08                 |   |
| 93. | Taurinate<br>[Tau] <sup>-</sup>                              | C <sub>2</sub> H <sub>6</sub> NO <sub>3</sub> S <sup>-</sup><br>124.13 |   |
| 94. | Tosylate<br>[Tosy] <sup>-</sup>                              | C <sub>7</sub> H <sub>7</sub> O <sub>3</sub> S <sup>-</sup><br>171.19  |   |
| 95. | Triflate<br>[CF <sub>3</sub> SO <sub>3</sub> ] <sup>-</sup>  | CF <sub>3</sub> O <sub>3</sub> S <sup>-</sup><br>149.06                |  |

**Table S3:** COSMO-RS predicted logarithmic activity coefficients of PET in different ILs at 363.15 K

|             | [ACh]+ | [BzTMA]+ | [Ch]+ | [DEM-2-MeoEA]+ | [EDMPrA]+ | [MTOA]+ | [TeBA]+ | [TeEA]+ | [TeMA]+ | [TEMA]+ | [VBeTMA]+ |
|-------------|--------|----------|-------|----------------|-----------|---------|---------|---------|---------|---------|-----------|
| [Ala]-      | 2.19   | 1.35     | 2.16  | 0.88           | 0.84      | 0.15    | 0.15    | 0.37    | 1.07    | 0.59    | 1.09      |
| [Arg]-      | 2.31   | 1.49     | 2.37  | 1.16           | 1.17      | 0.25    | 0.38    | 0.81    | 1.74    | 1.02    | 1.23      |
| [Aspg]-     | 2.57   | 1.74     | 2.55  | 1.26           | 1.25      | 0.29    | 0.45    | 0.81    | 1.52    | 1.02    | 1.45      |
| [Cyst]-     | 2.41   | 1.40     | 2.45  | 0.96           | 0.95      | 0.06    | 0.10    | 0.50    | 1.58    | 0.75    | 1.10      |
| [Glumn]-    | 2.44   | 1.58     | 2.49  | 1.18           | 1.18      | 0.26    | 0.38    | 0.77    | 1.68    | 1.00    | 1.30      |
| [Gly]-      | 1.85   | 1.27     | 1.60  | 0.71           | 0.61      | 0.16    | 0.14    | 0.13    | 0.16    | 0.29    | 1.05      |
| [His]-      | 2.72   | 1.71     | 2.82  | 1.35           | 1.37      | 0.26    | 0.42    | 0.97    | 2.14    | 1.22    | 1.40      |
| [Isole]-    | 2.11   | 1.20     | 2.20  | 0.91           | 0.92      | 0.12    | 0.12    | 0.53    | 1.61    | 0.78    | 0.94      |
| [Leu]-      | 2.11   | 1.17     | 2.20  | 0.91           | 0.92      | 0.11    | 0.11    | 0.54    | 1.64    | 0.79    | 0.92      |
| [Lys]-      | 2.07   | 1.22     | 2.14  | 0.90           | 0.91      | 0.12    | 0.14    | 0.52    | 1.52    | 0.76    | 0.97      |
| [Met]-      | 2.10   | 1.18     | 2.16  | 0.84           | 0.84      | 0.03    | 0.04    | 0.45    | 1.55    | 0.69    | 0.91      |
| [Phe]-      | 2.05   | 1.11     | 2.13  | 0.84           | 0.85      | 0.01    | 0.04    | 0.49    | 1.62    | 0.74    | 0.86      |
| [Pro]-      | 2.10   | 1.25     | 2.14  | 0.85           | 0.85      | 0.12    | 0.10    | 0.40    | 1.34    | 0.65    | 0.99      |
| [AspMA]-    | 2.97   | 1.93     | 3.11  | 1.50           | 1.55      | 0.38    | 0.54    | 1.09    | 2.27    | 1.36    | 1.59      |
| [GluMA]-    | 2.80   | 1.81     | 2.95  | 1.45           | 1.49      | 0.38    | 0.53    | 1.08    | 2.29    | 1.34    | 1.49      |
| [Ser]-      | 2.57   | 1.76     | 2.56  | 1.26           | 1.24      | 0.35    | 0.47    | 0.78    | 1.42    | 1.00    | 1.47      |
| [Thr]-      | 2.44   | 1.44     | 2.51  | 1.02           | 1.02      | 0.12    | 0.17    | 0.56    | 1.65    | 0.82    | 1.13      |
| [Try]-      | 2.19   | 1.25     | 2.26  | 1.05           | 1.07      | 0.12    | 0.22    | 0.77    | 1.86    | 1.00    | 1.01      |
| [Tyro]-     | 2.57   | 1.58     | 2.70  | 1.33           | 1.38      | 0.29    | 0.43    | 1.04    | 2.25    | 1.29    | 1.30      |
| [Val]-      | 2.28   | 1.30     | 2.38  | 0.97           | 0.98      | 0.13    | 0.14    | 0.56    | 1.69    | 0.82    | 1.02      |
| [2Alm]-     | 2.32   | 1.47     | 2.19  | 0.91           | 0.85      | 0.06    | 0.10    | 0.35    | 0.85    | 0.56    | 1.17      |
| [2MIm]-     | 2.59   | 1.43     | 2.65  | 1.00           | 0.99      | 0.04    | 0.05    | 0.51    | 1.72    | 0.79    | 1.10      |
| [45DCIm]-   | 2.85   | 1.28     | 2.99  | 1.10           | 1.12      | -0.09   | -0.02   | 0.76    | 2.61    | 1.08    | 0.92      |
| [56DMBeIm]- | 2.10   | 1.03     | 2.16  | 0.81           | 0.81      | -0.07   | -0.06   | 0.46    | 1.69    | 0.72    | 0.77      |
| [BeIm]-     | 2.62   | 1.32     | 2.74  | 1.00           | 1.01      | -0.06   | -0.02   | 0.60    | 2.12    | 0.89    | 0.98      |
| [Sac]-      | 2.61   | 1.44     | 2.73  | 1.08           | 1.11      | -0.03   | 0.08    | 0.70    | 2.15    | 0.99    | 1.11      |
| [2-Mbut]-   | 2.11   | 1.22     | 2.14  | 0.83           | 0.81      | 0.10    | 0.07    | 0.38    | 1.34    | 0.62    | 0.96      |

|                              |      |      |      |      |      |       |       |       |       |       |      |
|------------------------------|------|------|------|------|------|-------|-------|-------|-------|-------|------|
| [2-BrMAcr]-                  | 2.42 | 1.26 | 2.49 | 0.90 | 0.89 | -0.04 | -0.03 | 0.48  | 1.85  | 0.76  | 0.96 |
| [2-BOA]-                     | 1.33 | 0.78 | 1.42 | 0.63 | 0.65 | 0.10  | 0.05  | 0.37  | 1.07  | 0.55  | 0.63 |
| [2-ClAce]-                   | 2.57 | 1.55 | 2.56 | 1.03 | 1.00 | 0.12  | 0.17  | 0.50  | 1.34  | 0.75  | 1.22 |
| [2-EBA]-                     | 1.99 | 1.14 | 2.07 | 0.85 | 0.86 | 0.14  | 0.11  | 0.47  | 1.45  | 0.71  | 0.91 |
| [2-EHA]-                     | 1.73 | 0.99 | 1.81 | 0.78 | 0.79 | 0.12  | 0.09  | 0.45  | 1.34  | 0.68  | 0.79 |
| [2-HOA]-                     | 1.12 | 0.65 | 1.20 | 0.53 | 0.55 | 0.08  | 0.03  | 0.30  | 0.90  | 0.47  | 0.52 |
| [2-(OH)MAcr]-                | 2.60 | 1.49 | 2.68 | 1.04 | 1.04 | 0.09  | 0.14  | 0.57  | 1.75  | 0.84  | 1.16 |
| [22-DMB]-                    | 2.07 | 1.17 | 2.15 | 0.89 | 0.90 | 0.15  | 0.13  | 0.51  | 1.52  | 0.75  | 0.93 |
| [3-(OH) <sub>2</sub> -MBut]- | 2.71 | 1.66 | 2.83 | 1.29 | 1.31 | 0.29  | 0.39  | 0.88  | 2.04  | 1.14  | 1.35 |
| [4-EOA]-                     | 1.53 | 0.89 | 1.62 | 0.69 | 0.71 | 0.09  | 0.05  | 0.40  | 1.21  | 0.60  | 0.70 |
| [Abt]-                       | 1.06 | 0.57 | 1.12 | 0.47 | 0.48 | 0.04  | 0.00  | 0.26  | 0.84  | 0.41  | 0.45 |
| [Ace]-                       | 1.65 | 1.16 | 1.33 | 0.61 | 0.48 | 0.17  | 0.12  | 0.02  | -0.21 | 0.15  | 0.98 |
| [AceSal]-                    | 2.20 | 1.22 | 2.27 | 0.90 | 0.91 | 0.01  | 0.06  | 0.54  | 1.73  | 0.79  | 0.94 |
| [Acryl]-                     | 2.12 | 1.33 | 1.99 | 0.80 | 0.73 | 0.12  | 0.10  | 0.25  | 0.70  | 0.45  | 1.07 |
| [Benzoate]-                  | 2.30 | 1.27 | 2.36 | 0.89 | 0.89 | 0.03  | 0.05  | 0.47  | 1.64  | 0.72  | 0.99 |
| [But]-                       | 2.08 | 1.24 | 2.10 | 0.84 | 0.82 | 0.15  | 0.12  | 0.38  | 1.20  | 0.61  | 1.00 |
| [C3C]-                       | 2.18 | 1.25 | 2.24 | 0.90 | 0.91 | 0.01  | 0.08  | 0.54  | 1.68  | 0.78  | 0.99 |
| [Crotonate]-                 | 2.03 | 1.22 | 1.99 | 0.77 | 0.72 | 0.10  | 0.07  | 0.27  | 0.98  | 0.49  | 0.98 |
| [Dec]-                       | 1.49 | 0.87 | 1.58 | 0.68 | 0.70 | 0.09  | 0.05  | 0.39  | 1.18  | 0.59  | 0.69 |
| [For]-                       | 1.18 | 1.10 | 0.44 | 0.43 | 0.21 | 0.17  | 0.13  | -0.24 | -1.63 | -0.21 | 0.99 |
| [Gen]-                       | 3.24 | 2.26 | 3.39 | 1.84 | 1.90 | 0.58  | 0.84  | 1.48  | 2.62  | 1.74  | 1.91 |
| [Glyco]-                     | 1.53 | 1.35 | 1.09 | 0.78 | 0.64 | 0.41  | 0.45  | 0.23  | -0.51 | 0.29  | 1.23 |
| [Hex]-                       | 1.93 | 1.12 | 2.01 | 0.83 | 0.84 | 0.13  | 0.10  | 0.44  | 1.40  | 0.68  | 0.89 |
| [Im2C]-                      | 2.18 | 1.41 | 2.08 | 0.89 | 0.84 | 0.13  | 0.18  | 0.39  | 0.95  | 0.59  | 1.15 |
| [I3A]-                       | 2.32 | 1.35 | 2.40 | 1.09 | 1.11 | 0.15  | 0.24  | 0.77  | 1.91  | 1.01  | 1.09 |
| [Lac]-                       | 1.94 | 1.43 | 1.77 | 0.92 | 0.85 | 0.36  | 0.39  | 0.42  | 0.51  | 0.57  | 1.23 |
| [MCb]-                       | 2.15 | 1.40 | 2.00 | 0.82 | 0.75 | 0.12  | 0.13  | 0.25  | 0.61  | 0.45  | 1.14 |
| [N-MCb]-                     | 1.74 | 1.19 | 1.50 | 0.64 | 0.54 | 0.15  | 0.11  | 0.08  | 0.13  | 0.23  | 0.99 |
| [NMeO]-                      | 2.13 | 1.32 | 2.07 | 0.80 | 0.75 | 0.08  | 0.09  | 0.28  | 0.98  | 0.50  | 1.06 |



|                           |      |      |      |      |      |       |       |      |      |      |      |
|---------------------------|------|------|------|------|------|-------|-------|------|------|------|------|
| [Oct]-                    | 1.71 | 0.99 | 1.79 | 0.76 | 0.78 | 0.11  | 0.07  | 0.43 | 1.32 | 0.66 | 0.79 |
| [Oxa]-                    | 2.28 | 1.63 | 2.01 | 1.02 | 0.93 | 0.21  | 0.31  | 0.46 | 0.47 | 0.62 | 1.36 |
| [Prop]-                   | 2.04 | 1.27 | 1.96 | 0.80 | 0.74 | 0.17  | 0.13  | 0.28 | 0.81 | 0.48 | 1.03 |
| [Sal]-                    | 2.65 | 1.76 | 2.73 | 1.33 | 1.35 | 0.33  | 0.47  | 0.92 | 1.91 | 1.16 | 1.46 |
| [ThioSal]-                | 2.33 | 1.26 | 2.39 | 0.91 | 0.91 | -0.03 | 0.02  | 0.52 | 1.77 | 0.78 | 0.97 |
| [TFA]-                    | 3.28 | 1.69 | 3.55 | 1.32 | 1.35 | 0.07  | 0.16  | 0.86 | 2.73 | 1.21 | 1.26 |
| [TSAC]-                   | 1.71 | 0.62 | 1.64 | 0.70 | 0.68 | -0.04 | 0.04  | 0.54 | 1.43 | 0.71 | 0.42 |
| [B(F <sub>5</sub> )SI]-   | 1.00 | 0.24 | 0.93 | 0.37 | 0.33 | -0.08 | -0.05 | 0.26 | 0.71 | 0.35 | 0.14 |
| [MSA]-                    | 2.77 | 1.61 | 2.90 | 1.17 | 1.20 | 0.04  | 0.17  | 0.75 | 2.12 | 1.03 | 1.25 |
| [TFMI]                    | 1.73 | 0.66 | 1.65 | 0.73 | 0.72 | -0.03 | 0.06  | 0.58 | 1.48 | 0.75 | 0.45 |
| [DCN]-                    | 3.40 | 1.74 | 3.64 | 1.21 | 1.22 | -0.15 | -0.08 | 0.66 | 2.52 | 1.03 | 1.26 |
| [SbF <sub>6</sub> ]-      | 3.27 | 1.34 | 3.38 | 1.35 | 1.39 | -0.07 | 0.07  | 1.06 | 3.27 | 1.43 | 0.92 |
| [PF <sub>6</sub> ]-       | 4.14 | 1.87 | 4.60 | 1.66 | 1.76 | -0.06 | 0.13  | 1.27 | 4.32 | 1.74 | 1.31 |
| [NO <sub>3</sub> ]-       | 2.57 | 1.83 | 2.17 | 1.07 | 0.97 | 0.11  | 0.21  | 0.41 | 0.14 | 0.59 | 1.47 |
| [WOF <sub>5</sub> ]-      | 3.62 | 1.58 | 3.86 | 1.50 | 1.57 | -0.04 | 0.12  | 1.17 | 3.72 | 1.58 | 1.11 |
| [Phenolate]-              | 2.60 | 1.39 | 2.69 | 1.02 | 1.02 | 0.05  | 0.08  | 0.57 | 1.91 | 0.86 | 1.06 |
| [BF <sub>4</sub> ]-       | 4.12 | 2.36 | 4.42 | 1.67 | 1.74 | 0.03  | 0.22  | 1.09 | 2.85 | 1.50 | 1.74 |
| [SCN]-                    | 3.30 | 1.90 | 3.29 | 1.22 | 1.21 | -0.13 | -0.03 | 0.61 | 1.58 | 0.92 | 1.41 |
| [PhS]-                    | 2.59 | 1.34 | 2.71 | 0.98 | 0.98 | -0.08 | -0.04 | 0.54 | 1.99 | 0.84 | 1.00 |
| [TFMSM]-                  | 1.19 | 0.41 | 1.06 | 0.52 | 0.51 | 0.00  | 0.08  | 0.44 | 0.97 | 0.54 | 0.27 |
| [TCN]-                    | 2.91 | 1.24 | 3.06 | 0.97 | 0.98 | -0.27 | -0.23 | 0.58 | 2.62 | 0.92 | 0.86 |
| [DBPO <sub>4</sub> ]-     | 1.60 | 0.88 | 1.69 | 0.68 | 0.70 | 0.04  | 0.03  | 0.40 | 1.28 | 0.60 | 0.68 |
| [DEPO <sub>4</sub> ]-     | 2.11 | 1.21 | 2.21 | 0.87 | 0.88 | 0.07  | 0.08  | 0.48 | 1.59 | 0.73 | 0.94 |
| [DIsoPrPO <sub>4</sub> ]- | 1.91 | 1.07 | 2.01 | 0.81 | 0.83 | 0.06  | 0.07  | 0.48 | 1.52 | 0.71 | 0.83 |
| [DMPO <sub>4</sub> ]-     | 2.33 | 1.39 | 2.38 | 0.93 | 0.92 | 0.09  | 0.12  | 0.45 | 1.48 | 0.70 | 1.10 |
| [22-(ME)OHES]-            | 2.19 | 1.20 | 2.28 | 0.93 | 0.96 | 0.02  | 0.11  | 0.62 | 1.80 | 0.86 | 0.92 |
| [BzS]-                    | 2.52 | 1.41 | 2.63 | 1.01 | 1.03 | 0.00  | 0.07  | 0.60 | 1.94 | 0.88 | 1.09 |
| [EtSO <sub>4</sub> ]-     | 2.80 | 1.59 | 2.94 | 1.13 | 1.15 | 0.05  | 0.14  | 0.67 | 2.05 | 0.96 | 1.22 |

|                                     |      |      |      |      |      |       |      |      |      |      |      |
|-------------------------------------|------|------|------|------|------|-------|------|------|------|------|------|
| [HSO <sub>3</sub> ]-                | 2.01 | 1.12 | 2.12 | 0.83 | 0.86 | 0.04  | 0.06 | 0.48 | 1.58 | 0.73 | 0.86 |
| [HSO <sub>4</sub> ]-                | 3.43 | 2.41 | 3.34 | 1.68 | 1.70 | 0.28  | 0.53 | 1.11 | 1.59 | 1.38 | 1.95 |
| [MetA]-                             | 2.94 | 1.80 | 3.08 | 1.39 | 1.43 | 0.12  | 0.32 | 0.99 | 2.36 | 1.28 | 1.44 |
| [MeSO <sub>4</sub> ]-               | 2.93 | 1.76 | 3.00 | 1.18 | 1.18 | 0.07  | 0.18 | 0.66 | 1.81 | 0.94 | 1.36 |
| [MeSO <sub>3</sub> ]-               | 2.17 | 1.46 | 2.00 | 0.84 | 0.77 | 0.11  | 0.15 | 0.26 | 0.56 | 0.45 | 1.18 |
| [F <sub>9</sub> BSO <sub>3</sub> ]- | 1.97 | 0.91 | 2.06 | 0.88 | 0.89 | 0.01  | 0.11 | 0.67 | 1.75 | 0.88 | 0.67 |
| [OctSO <sub>3</sub> ]-              | 1.73 | 0.95 | 1.84 | 0.73 | 0.75 | 0.02  | 0.03 | 0.42 | 1.39 | 0.64 | 0.73 |
| [NH <sub>2</sub> SO <sub>3</sub> ]- | 2.26 | 1.78 | 1.85 | 1.09 | 0.99 | 0.22  | 0.38 | 0.49 | 0.05 | 0.62 | 1.51 |
| [Tau]-                              | 2.39 | 1.56 | 2.34 | 1.02 | 0.99 | 0.15  | 0.25 | 0.52 | 1.19 | 0.73 | 1.27 |
| [Tosy]-                             | 2.28 | 1.25 | 2.37 | 0.90 | 0.92 | -0.02 | 0.03 | 0.53 | 1.77 | 0.78 | 0.96 |
| [CF <sub>3</sub> SO <sub>3</sub> ]- | 3.34 | 1.64 | 3.64 | 1.37 | 1.43 | 0.02  | 0.15 | 0.99 | 3.09 | 1.35 | 1.20 |

**Table S3 (continued...):** COSMO-RS predicted logarithmic activity coefficients of PET in different ILs at 363.15 K

|          | [DMIM]+ | [AMIM]+ | [BzBIM]+ | [BzMIM]+ | [BDMIM]+ | [BMIM]+ | [1-BIM]+ | [EDMIM]+ | [EMBzIM]+ | [EMIM]+ | [HMIM]+ |
|----------|---------|---------|----------|----------|----------|---------|----------|----------|-----------|---------|---------|
| [Ala]-   | 1.31    | 1.33    | 0.76     | 1.06     | 0.52     | 1.20    | 2.20     | 0.59     | 0.81      | 1.26    | 1.09    |
| [Arg]-   | 1.68    | 1.53    | 0.89     | 1.22     | 0.83     | 1.34    | 2.06     | 1.01     | 1.08      | 1.52    | 1.19    |
| [Aspg]-  | 1.76    | 1.74    | 1.05     | 1.43     | 0.93     | 1.55    | 2.52     | 1.04     | 1.23      | 1.67    | 1.38    |
| [Cyst]-  | 1.61    | 1.44    | 0.71     | 1.10     | 0.59     | 1.19    | 2.04     | 0.78     | 0.92      | 1.40    | 1.01    |
| [Glumn]- | 1.71    | 1.60    | 0.93     | 1.29     | 0.83     | 1.41    | 2.26     | 0.99     | 1.11      | 1.57    | 1.25    |
| [Gly]-   | 0.87    | 1.18    | 0.78     | 1.01     | 0.41     | 1.16    | 2.31     | 0.32     | 0.69      | 1.02    | 1.11    |
| [His]-   | 2.03    | 1.79    | 0.98     | 1.41     | 0.97     | 1.51    | 2.26     | 1.23     | 1.28      | 1.79    | 1.29    |
| [Isole]- | 1.45    | 1.24    | 0.63     | 0.92     | 0.53     | 1.07    | 1.76     | 0.74     | 0.78      | 1.26    | 0.92    |
| [Leu]-   | 1.45    | 1.22    | 0.60     | 0.90     | 0.52     | 1.04    | 1.71     | 0.75     | 0.77      | 1.25    | 0.89    |
| [Lys]-   | 1.40    | 1.24    | 0.65     | 0.94     | 0.54     | 1.08    | 1.80     | 0.72     | 0.78      | 1.24    | 0.95    |
| [Met]-   | 1.43    | 1.22    | 0.58     | 0.91     | 0.48     | 1.01    | 1.71     | 0.70     | 0.76      | 1.22    | 0.86    |
| [Phe]-   | 1.44    | 1.18    | 0.53     | 0.87     | 0.49     | 0.96    | 1.57     | 0.73     | 0.75      | 1.21    | 0.79    |
| [Pro]-   | 1.35    | 1.25    | 0.68     | 0.96     | 0.48     | 1.11    | 1.99     | 0.62     | 0.75      | 1.23    | 0.99    |

|                              |      |      |      |      |      |      |      |      |      |      |      |
|------------------------------|------|------|------|------|------|------|------|------|------|------|------|
| [AspMA]-                     | 2.22 | 1.99 | 1.13 | 1.58 | 1.11 | 1.71 | 2.61 | 1.35 | 1.44 | 1.98 | 1.47 |
| [GluMA]-                     | 2.13 | 1.87 | 1.07 | 1.48 | 1.06 | 1.61 | 2.41 | 1.32 | 1.36 | 1.89 | 1.39 |
| [Ser]-                       | 1.72 | 1.75 | 1.07 | 1.44 | 0.91 | 1.58 | 2.63 | 0.99 | 1.21 | 1.66 | 1.43 |
| [Thr]-                       | 1.60 | 1.44 | 0.74 | 1.11 | 0.62 | 1.22 | 2.11 | 0.80 | 0.92 | 1.41 | 1.06 |
| [Try]-                       | 1.65 | 1.36 | 0.67 | 1.02 | 0.71 | 1.10 | 1.60 | 0.99 | 0.97 | 1.40 | 0.91 |
| [Tyro]-                      | 2.01 | 1.69 | 0.91 | 1.31 | 0.97 | 1.41 | 2.01 | 1.27 | 1.24 | 1.74 | 1.19 |
| [Val]-                       | 1.54 | 1.33 | 0.67 | 1.00 | 0.57 | 1.13 | 1.89 | 0.78 | 0.84 | 1.34 | 0.98 |
| [2Alm]-                      | 1.32 | 1.44 | 0.77 | 1.15 | 0.56 | 1.26 | 2.32 | 0.60 | 0.89 | 1.31 | 1.12 |
| [2MIm]-                      | 1.68 | 1.48 | 0.67 | 1.09 | 0.57 | 1.19 | 2.04 | 0.79 | 0.92 | 1.45 | 1.00 |
| [45DCIm]-                    | 2.01 | 1.41 | 0.42 | 0.95 | 0.59 | 0.95 | 1.35 | 1.05 | 0.93 | 1.51 | 0.64 |
| [56DMBeIm]-                  | 1.44 | 1.13 | 0.42 | 0.79 | 0.43 | 0.86 | 1.38 | 0.71 | 0.71 | 1.16 | 0.67 |
| [BeIm]-                      | 1.82 | 1.42 | 0.53 | 1.01 | 0.57 | 1.06 | 1.68 | 0.90 | 0.92 | 1.45 | 0.81 |
| [Sac]-                       | 1.90 | 1.53 | 0.64 | 1.13 | 0.68 | 1.15 | 1.84 | 1.01 | 1.02 | 1.54 | 0.90 |
| [2-Mbut]-                    | 1.37 | 1.25 | 0.65 | 0.96 | 0.47 | 1.08 | 1.92 | 0.63 | 0.75 | 1.22 | 0.95 |
| [2-BrMAcr]-                  | 1.74 | 1.40 | 0.57 | 1.01 | 0.52 | 1.06 | 1.76 | 0.83 | 0.88 | 1.41 | 0.83 |
| [2-BOA]-                     | 0.98 | 0.85 | 0.45 | 0.61 | 0.35 | 0.77 | 1.28 | 0.51 | 0.50 | 0.89 | 0.69 |
| [2-ClAce]-                   | 1.58 | 1.54 | 0.79 | 1.20 | 0.62 | 1.29 | 2.32 | 0.75 | 0.98 | 1.45 | 1.11 |
| [2-EBA]-                     | 1.35 | 1.19 | 0.63 | 0.89 | 0.49 | 1.04 | 1.76 | 0.68 | 0.73 | 1.20 | 0.91 |
| [2-EHA]-                     | 1.22 | 1.05 | 0.55 | 0.77 | 0.44 | 0.93 | 1.54 | 0.63 | 0.64 | 1.08 | 0.82 |
| [2-HOA]-                     | 0.83 | 0.72 | 0.37 | 0.50 | 0.29 | 0.66 | 1.10 | 0.43 | 0.42 | 0.76 | 0.59 |
| [2-(OH)MAcr]-                | 1.72 | 1.52 | 0.73 | 1.16 | 0.63 | 1.24 | 2.14 | 0.84 | 0.97 | 1.49 | 1.04 |
| [22-DMB]-                    | 1.40 | 1.22 | 0.64 | 0.91 | 0.51 | 1.06 | 1.78 | 0.71 | 0.76 | 1.24 | 0.93 |
| [3-(OH) <sub>2</sub> -MBut]- | 1.96 | 1.73 | 0.94 | 1.35 | 0.89 | 1.46 | 2.29 | 1.13 | 1.21 | 1.73 | 1.26 |
| [4-EOA]-                     | 1.10 | 0.95 | 0.49 | 0.69 | 0.39 | 0.85 | 1.42 | 0.56 | 0.56 | 0.98 | 0.75 |
| [Abt]-                       | 0.77 | 0.64 | 0.30 | 0.44 | 0.24 | 0.58 | 0.96 | 0.38 | 0.37 | 0.68 | 0.51 |
| [Ace]-                       | 0.67 | 1.07 | 0.76 | 0.95 | 0.33 | 1.09 | 2.29 | 0.19 | 0.60 | 0.89 | 1.08 |
| [AceSal]-                    | 1.55 | 1.28 | 0.58 | 0.96 | 0.54 | 1.01 | 1.67 | 0.80 | 0.83 | 1.29 | 0.83 |
| [Acryl]-                     | 1.19 | 1.30 | 0.75 | 1.06 | 0.46 | 1.17 | 2.25 | 0.49 | 0.78 | 1.19 | 1.07 |
| [Benzoate]-                  | 1.57 | 1.34 | 0.62 | 1.00 | 0.52 | 1.08 | 1.85 | 0.75 | 0.84 | 1.33 | 0.90 |

|                         |      |      |       |      |      |      |      |       |      |      |      |
|-------------------------|------|------|-------|------|------|------|------|-------|------|------|------|
| [But]-                  | 1.30 | 1.25 | 0.70  | 0.97 | 0.48 | 1.12 | 2.03 | 0.59  | 0.74 | 1.21 | 1.01 |
| [C3C]-                  | 1.56 | 1.32 | 0.63  | 1.01 | 0.57 | 1.06 | 1.76 | 0.81  | 0.87 | 1.32 | 0.87 |
| [Crotonate]-            | 1.22 | 1.22 | 0.68  | 0.97 | 0.43 | 1.09 | 2.06 | 0.51  | 0.72 | 1.15 | 0.99 |
| [Dec]-                  | 1.07 | 0.92 | 0.48  | 0.67 | 0.38 | 0.83 | 1.39 | 0.55  | 0.55 | 0.96 | 0.74 |
| [For]-                  | 0.05 | 0.91 | 0.80  | 0.94 | 0.24 | 1.07 | 2.49 | -0.12 | 0.50 | 0.60 | 1.12 |
| [Gen]-                  | 2.62 | 2.36 | 1.44  | 1.93 | 1.49 | 2.05 | 2.94 | 1.75  | 1.82 | 2.37 | 1.79 |
| [Glyco]-                | 0.64 | 1.23 | 1.05  | 1.18 | 0.60 | 1.36 | 2.65 | 0.35  | 0.82 | 1.02 | 1.39 |
| [Hex]-                  | 1.31 | 1.16 | 0.62  | 0.87 | 0.47 | 1.03 | 1.77 | 0.65  | 0.70 | 1.17 | 0.91 |
| [Im2C]-                 | 1.36 | 1.42 | 0.81  | 1.16 | 0.59 | 1.25 | 2.26 | 0.66  | 0.91 | 1.31 | 1.12 |
| [I3A]-                  | 1.74 | 1.45 | 0.73  | 1.11 | 0.75 | 1.19 | 1.77 | 1.02  | 1.02 | 1.48 | 0.99 |
| [Lac]-                  | 1.12 | 1.38 | 0.99  | 1.20 | 0.66 | 1.37 | 2.50 | 0.59  | 0.91 | 1.25 | 1.32 |
| [MCb]-                  | 1.17 | 1.35 | 0.79  | 1.11 | 0.49 | 1.22 | 2.40 | 0.49  | 0.81 | 1.21 | 1.12 |
| [N-MCb]-                | 0.81 | 1.11 | 0.74  | 0.95 | 0.36 | 1.10 | 2.25 | 0.27  | 0.63 | 0.96 | 1.07 |
| [NMeO]-                 | 1.27 | 1.30 | 0.72  | 1.05 | 0.47 | 1.14 | 2.17 | 0.54  | 0.78 | 1.20 | 1.02 |
| [Oct]-                  | 1.20 | 1.04 | 0.55  | 0.77 | 0.43 | 0.93 | 1.56 | 0.61  | 0.63 | 1.07 | 0.82 |
| [Oxa]-                  | 1.30 | 1.57 | 0.97  | 1.34 | 0.72 | 1.45 | 2.65 | 0.68  | 1.05 | 1.40 | 1.32 |
| [Prop]-                 | 1.16 | 1.24 | 0.74  | 1.00 | 0.45 | 1.15 | 2.17 | 0.49  | 0.73 | 1.16 | 1.06 |
| [Sal]-                  | 1.98 | 1.83 | 1.07  | 1.47 | 1.00 | 1.59 | 2.49 | 1.19  | 1.31 | 1.80 | 1.39 |
| [ThioSal]-              | 1.65 | 1.36 | 0.59  | 1.01 | 0.55 | 1.06 | 1.74 | 0.82  | 0.88 | 1.36 | 0.85 |
| [TFA]-                  | 2.28 | 1.77 | 0.70  | 1.26 | 0.77 | 1.31 | 2.10 | 1.16  | 1.16 | 1.81 | 1.00 |
| [TSAC]-                 | 1.04 | 0.68 | 0.12  | 0.42 | 0.34 | 0.44 | 0.51 | 0.62  | 0.46 | 0.78 | 0.24 |
| [B(F <sub>5</sub> )SI]- | 0.54 | 0.34 | -0.01 | 0.16 | 0.14 | 0.20 | 0.15 | 0.32  | 0.22 | 0.41 | 0.08 |
| [MSA]-                  | 1.93 | 1.64 | 0.75  | 1.25 | 0.76 | 1.29 | 2.12 | 1.03  | 1.11 | 1.62 | 1.05 |
| [TFMI]                  | 1.09 | 0.73 | 0.15  | 0.46 | 0.38 | 0.48 | 0.55 | 0.67  | 0.50 | 0.83 | 0.27 |
| [DCN]-                  | 2.38 | 1.88 | 0.63  | 1.31 | 0.68 | 1.31 | 2.19 | 1.10  | 1.17 | 1.87 | 0.95 |
| [SbF <sub>6</sub> ]-    | 2.27 | 1.44 | 0.31  | 0.92 | 0.68 | 0.89 | 0.98 | 1.27  | 0.97 | 1.64 | 0.50 |
| [PF <sub>6</sub> ]-     | 3.04 | 1.99 | 0.52  | 1.30 | 0.90 | 1.26 | 1.60 | 1.59  | 1.33 | 2.18 | 0.76 |
| [NO <sub>3</sub> ]-     | 1.32 | 1.72 | 0.93  | 1.44 | 0.70 | 1.50 | 2.91 | 0.66  | 1.12 | 1.48 | 1.30 |
| [WOF <sub>5</sub> ]-    | 2.62 | 1.70 | 0.44  | 1.11 | 0.80 | 1.08 | 1.32 | 1.43  | 1.15 | 1.90 | 0.65 |

|                                     |      |      |      |      |      |      |      |      |      |      |      |
|-------------------------------------|------|------|------|------|------|------|------|------|------|------|------|
| [Phenolate]-                        | 1.74 | 1.45 | 0.64 | 1.07 | 0.59 | 1.15 | 1.88 | 0.85 | 0.93 | 1.45 | 0.93 |
| [BF <sub>4</sub> ]-                 | 2.83 | 2.36 | 0.88 | 1.72 | 1.02 | 1.70 | 2.73 | 1.46 | 1.55 | 2.33 | 1.24 |
| [SCN]-                              | 2.12 | 1.97 | 0.73 | 1.45 | 0.74 | 1.45 | 2.56 | 1.01 | 1.25 | 1.85 | 1.10 |
| [PhS]-                              | 1.79 | 1.44 | 0.56 | 1.03 | 0.56 | 1.09 | 1.83 | 0.86 | 0.91 | 1.45 | 0.85 |
| [TFMSM]-                            | 0.70 | 0.46 | 0.07 | 0.28 | 0.28 | 0.30 | 0.25 | 0.47 | 0.33 | 0.53 | 0.15 |
| [TCN]-                              | 2.11 | 1.44 | 0.31 | 0.93 | 0.48 | 0.88 | 1.34 | 0.99 | 0.89 | 1.52 | 0.52 |
| [DBPO <sub>4</sub> ]-               | 1.11 | 0.92 | 0.43 | 0.67 | 0.37 | 0.78 | 1.33 | 0.56 | 0.56 | 0.95 | 0.67 |
| [DEPO <sub>4</sub> ]-               | 1.44 | 1.24 | 0.60 | 0.92 | 0.50 | 1.04 | 1.80 | 0.70 | 0.76 | 1.24 | 0.89 |
| [DIsoPrPO <sub>4</sub> ]-           | 1.33 | 1.11 | 0.53 | 0.81 | 0.46 | 0.93 | 1.57 | 0.68 | 0.69 | 1.14 | 0.79 |
| [DMPO <sub>4</sub> ]-               | 1.50 | 1.39 | 0.71 | 1.07 | 0.55 | 1.17 | 2.11 | 0.70 | 0.86 | 1.34 | 1.02 |
| [22-(ME)OHES]-                      | 1.52 | 1.22 | 0.53 | 0.91 | 0.56 | 0.96 | 1.54 | 0.82 | 0.82 | 1.25 | 0.77 |
| [BzS]-                              | 1.77 | 1.47 | 0.65 | 1.10 | 0.62 | 1.15 | 1.93 | 0.90 | 0.96 | 1.47 | 0.92 |
| [EtSO <sub>4</sub> ]-               | 1.88 | 1.61 | 0.72 | 1.21 | 0.68 | 1.26 | 2.17 | 0.95 | 1.04 | 1.58 | 1.02 |
| [HSO <sub>3</sub> ]-                | 1.38 | 1.15 | 0.53 | 0.84 | 0.47 | 0.96 | 1.65 | 0.69 | 0.71 | 1.17 | 0.81 |
| [HSO <sub>4</sub> ]-                | 2.33 | 2.40 | 1.28 | 1.94 | 1.25 | 2.02 | 3.38 | 1.41 | 1.70 | 2.25 | 1.70 |
| [MetA]-                             | 2.21 | 1.88 | 0.93 | 1.46 | 0.98 | 1.52 | 2.33 | 1.29 | 1.34 | 1.88 | 1.24 |
| [MeSO <sub>4</sub> ]-               | 1.91 | 1.75 | 0.81 | 1.35 | 0.74 | 1.39 | 2.45 | 0.96 | 1.14 | 1.67 | 1.14 |
| [MeSO <sub>3</sub> ]-               | 1.15 | 1.38 | 0.81 | 1.15 | 0.51 | 1.25 | 2.49 | 0.49 | 0.84 | 1.21 | 1.15 |
| [F <sub>9</sub> BSO <sub>3</sub> ]- | 1.37 | 1.00 | 0.33 | 0.67 | 0.50 | 0.74 | 1.09 | 0.80 | 0.68 | 1.09 | 0.52 |
| [OctSO <sub>3</sub> ]-              | 1.19 | 0.98 | 0.44 | 0.71 | 0.39 | 0.82 | 1.41 | 0.60 | 0.60 | 1.01 | 0.69 |
| [NH <sub>2</sub> SO <sub>3</sub> ]- | 1.17 | 1.67 | 1.08 | 1.47 | 0.81 | 1.59 | 2.98 | 0.68 | 1.14 | 1.43 | 1.47 |
| [Tau]-                              | 1.46 | 1.51 | 0.87 | 1.23 | 0.68 | 1.34 | 2.41 | 0.74 | 0.99 | 1.41 | 1.20 |
| [Tosy]-                             | 1.58 | 1.31 | 0.56 | 0.97 | 0.53 | 1.02 | 1.74 | 0.79 | 0.84 | 1.31 | 0.82 |
| [CF <sub>3</sub> SO <sub>3</sub> ]- | 2.40 | 1.75 | 0.61 | 1.22 | 0.80 | 1.24 | 1.87 | 1.28 | 1.17 | 1.84 | 0.88 |

**Table S3 (continued...):** COSMO-RS predicted logarithmic activity coefficients of PET in different ILs at 363.15 K

|             | [OMIM]+ | [PMIM]+ | [DMEIM]+ | [DIsoPIM]+ | [AQunz]+ | [BMPip]+ | [4AB124Tz]+ | [EMPip]+ | [EMBzTz]+ | [1-EQ]+ | [1-MQ]+ |
|-------------|---------|---------|----------|------------|----------|----------|-------------|----------|-----------|---------|---------|
| [Ala]-      | 0.97    | 1.22    | 0.59     | 0.82       | 1.61     | 0.62     | 2.48        | 0.58     | 0.63      | 0.79    | 1.20    |
| [Arg]-      | 1.05    | 1.41    | 1.01     | 1.04       | 1.74     | 0.90     | 2.26        | 1.00     | 0.92      | 1.06    | 1.40    |
| [Aspg]-     | 1.20    | 1.60    | 1.04     | 1.16       | 2.04     | 1.00     | 2.82        | 1.01     | 1.06      | 1.21    | 1.62    |
| [Cyst]-     | 0.86    | 1.28    | 0.78     | 0.81       | 1.78     | 0.63     | 2.28        | 0.72     | 0.74      | 0.90    | 1.33    |
| [Glumn]-    | 1.09    | 1.47    | 0.99     | 1.06       | 1.86     | 0.90     | 2.51        | 0.97     | 0.95      | 1.10    | 1.48    |
| [Gly]-      | 1.01    | 1.11    | 0.32     | 0.76       | 1.46     | 0.52     | 2.68        | 0.31     | 0.49      | 0.67    | 1.07    |
| [His]-      | 1.10    | 1.62    | 1.22     | 1.18       | 2.07     | 1.02     | 2.46        | 1.19     | 1.12      | 1.26    | 1.66    |
| [Isole]-    | 0.80    | 1.14    | 0.74     | 0.78       | 1.44     | 0.62     | 1.90        | 0.75     | 0.63      | 0.76    | 1.10    |
| [Leu]-      | 0.77    | 1.12    | 0.74     | 0.76       | 1.42     | 0.61     | 1.84        | 0.75     | 0.62      | 0.75    | 1.08    |
| [Lys]-      | 0.83    | 1.14    | 0.72     | 0.77       | 1.44     | 0.63     | 2.00        | 0.73     | 0.63      | 0.77    | 1.11    |
| [Met]-      | 0.73    | 1.09    | 0.69     | 0.68       | 1.48     | 0.53     | 1.90        | 0.66     | 0.61      | 0.75    | 1.11    |
| [Phe]-      | 0.66    | 1.05    | 0.73     | 0.67       | 1.42     | 0.53     | 1.73        | 0.70     | 0.62      | 0.73    | 1.07    |
| [Pro]-      | 0.88    | 1.15    | 0.62     | 0.76       | 1.49     | 0.58     | 2.23        | 0.62     | 0.59      | 0.74    | 1.12    |
| [AspMA]-    | 1.27    | 1.82    | 1.34     | 1.32       | 2.30     | 1.18     | 2.88        | 1.33     | 1.28      | 1.40    | 1.83    |
| [GluMA]-    | 1.21    | 1.72    | 1.31     | 1.27       | 2.13     | 1.14     | 2.63        | 1.31     | 1.22      | 1.33    | 1.72    |
| [Ser]-      | 1.26    | 1.62    | 0.99     | 1.19       | 2.03     | 1.01     | 2.95        | 0.99     | 1.03      | 1.18    | 1.61    |
| [Thr]-      | 0.91    | 1.30    | 0.79     | 0.85       | 1.73     | 0.70     | 2.39        | 0.79     | 0.76      | 0.89    | 1.30    |
| [Try]-      | 0.75    | 1.22    | 0.99     | 0.86       | 1.57     | 0.74     | 1.69        | 0.95     | 0.84      | 0.94    | 1.24    |
| [Tyro]-     | 1.02    | 1.54    | 1.27     | 1.14       | 1.92     | 1.01     | 2.13        | 1.24     | 1.11      | 1.22    | 1.56    |
| [Val]-      | 0.84    | 1.21    | 0.78     | 0.82       | 1.57     | 0.66     | 2.06        | 0.78     | 0.68      | 0.82    | 1.19    |
| [2Alm]-     | 0.97    | 1.29    | 0.60     | 0.82       | 1.79     | 0.63     | 2.70        | 0.56     | 0.68      | 0.86    | 1.31    |
| [2MIm]-     | 0.83    | 1.29    | 0.79     | 0.81       | 1.82     | 0.63     | 2.31        | 0.75     | 0.73      | 0.89    | 1.33    |
| [45DCIm]-   | 0.44    | 1.17    | 1.04     | 0.67       | 1.77     | 0.61     | 1.45        | 1.00     | 0.79      | 0.89    | 1.27    |
| [56DMBeIm]- | 0.53    | 0.98    | 0.71     | 0.58       | 1.38     | 0.45     | 1.52        | 0.67     | 0.56      | 0.68    | 1.01    |
| [BeIm]-     | 0.63    | 1.21    | 0.90     | 0.71       | 1.78     | 0.58     | 1.87        | 0.84     | 0.75      | 0.88    | 1.29    |
| [Sac]-      | 0.70    | 1.31    | 1.00     | 0.78       | 1.88     | 0.68     | 2.11        | 0.93     | 0.91      | 1.00    | 1.41    |
| [2-Mbut]-   | 0.83    | 1.13    | 0.63     | 0.74       | 1.51     | 0.54     | 2.14        | 0.60     | 0.60      | 0.75    | 1.12    |

|                              |      |      |       |      |      |      |      |       |      |      |      |
|------------------------------|------|------|-------|------|------|------|------|-------|------|------|------|
| [2-BrMAcr]-                  | 0.66 | 1.19 | 0.83  | 0.71 | 1.76 | 0.51 | 1.90 | 0.71  | 0.73 | 0.88 | 1.30 |
| [2-BOA]-                     | 0.62 | 0.81 | 0.51  | 0.59 | 0.91 | 0.43 | 1.30 | 0.53  | 0.39 | 0.50 | 0.73 |
| [2-ClAce]-                   | 0.94 | 1.36 | 0.75  | 0.88 | 1.90 | 0.71 | 2.66 | 0.72  | 0.80 | 0.94 | 1.39 |
| [2-EBA]-                     | 0.81 | 1.10 | 0.67  | 0.76 | 1.36 | 0.58 | 1.88 | 0.68  | 0.58 | 0.72 | 1.05 |
| [2-EHA]-                     | 0.72 | 0.99 | 0.63  | 0.69 | 1.17 | 0.53 | 1.61 | 0.64  | 0.51 | 0.63 | 0.92 |
| [2-HOA]-                     | 0.53 | 0.70 | 0.42  | 0.50 | 0.75 | 0.36 | 1.11 | 0.44  | 0.31 | 0.41 | 0.61 |
| [2-(OH)MAcr]-                | 0.87 | 1.34 | 0.84  | 0.85 | 1.87 | 0.69 | 2.44 | 0.80  | 0.82 | 0.94 | 1.38 |
| [22-DMB]-                    | 0.82 | 1.13 | 0.71  | 0.79 | 1.40 | 0.61 | 1.89 | 0.72  | 0.60 | 0.74 | 1.07 |
| [3-(OH) <sub>2</sub> -MBut]- | 1.08 | 1.57 | 1.12  | 1.13 | 2.01 | 0.97 | 2.50 | 1.10  | 1.05 | 1.17 | 1.58 |
| [4-EOA]-                     | 0.67 | 0.90 | 0.56  | 0.62 | 1.05 | 0.46 | 1.50 | 0.58  | 0.45 | 0.56 | 0.82 |
| [Abt]-                       | 0.45 | 0.62 | 0.38  | 0.44 | 0.68 | 0.30 | 0.95 | 0.39  | 0.26 | 0.36 | 0.54 |
| [Ace]-                       | 1.00 | 1.02 | 0.20  | 0.72 | 1.32 | 0.45 | 2.62 | 0.18  | 0.40 | 0.59 | 0.97 |
| [AceSal]-                    | 0.68 | 1.12 | 0.79  | 0.70 | 1.56 | 0.57 | 1.90 | 0.74  | 0.72 | 0.81 | 1.17 |
| [Acryl]-                     | 0.94 | 1.18 | 0.49  | 0.77 | 1.63 | 0.54 | 2.58 | 0.45  | 0.60 | 0.76 | 1.19 |
| [Benzoate]-                  | 0.76 | 1.18 | 0.75  | 0.74 | 1.65 | 0.56 | 2.07 | 0.69  | 0.70 | 0.82 | 1.22 |
| [But]-                       | 0.91 | 1.15 | 0.59  | 0.79 | 1.48 | 0.58 | 2.24 | 0.59  | 0.58 | 0.74 | 1.11 |
| [C3C]-                       | 0.72 | 1.16 | 0.81  | 0.73 | 1.61 | 0.58 | 2.02 | 0.74  | 0.76 | 0.85 | 1.22 |
| [Crotonate]-                 | 0.88 | 1.11 | 0.51  | 0.72 | 1.50 | 0.51 | 2.35 | 0.47  | 0.56 | 0.71 | 1.10 |
| [Dec]-                       | 0.66 | 0.88 | 0.55  | 0.61 | 1.02 | 0.46 | 1.46 | 0.57  | 0.44 | 0.55 | 0.80 |
| [For]-                       | 1.05 | 0.91 | -0.12 | 0.67 | 1.16 | 0.37 | 2.94 | -0.14 | 0.28 | 0.48 | 0.85 |
| [Gen]-                       | 1.55 | 2.19 | 1.75  | 1.69 | 2.67 | 1.53 | 3.18 | 1.71  | 1.68 | 1.79 | 2.22 |
| [Glyco]-                     | 1.31 | 1.24 | 0.35  | 1.01 | 1.42 | 0.73 | 3.02 | 0.34  | 0.62 | 0.81 | 1.14 |
| [Hex]-                       | 0.81 | 1.08 | 0.64  | 0.74 | 1.33 | 0.56 | 1.92 | 0.65  | 0.56 | 0.70 | 1.02 |
| [Im2C]-                      | 0.98 | 1.28 | 0.65  | 0.86 | 1.74 | 0.64 | 2.59 | 0.58  | 0.74 | 0.90 | 1.32 |
| [I3A]-                       | 0.83 | 1.31 | 1.01  | 0.92 | 1.70 | 0.77 | 1.90 | 0.97  | 0.89 | 1.00 | 1.33 |
| [Lac]-                       | 1.22 | 1.33 | 0.59  | 1.02 | 1.60 | 0.77 | 2.81 | 0.59  | 0.73 | 0.90 | 1.26 |
| [MCb]-                       | 0.99 | 1.22 | 0.49  | 0.79 | 1.68 | 0.58 | 2.79 | 0.45  | 0.63 | 0.79 | 1.23 |
| [N-MCb]-                     | 0.98 | 1.05 | 0.27  | 0.71 | 1.37 | 0.46 | 2.60 | 0.25  | 0.44 | 0.62 | 1.01 |
| [NMeO]-                      | 0.89 | 1.16 | 0.54  | 0.73 | 1.63 | 0.53 | 2.54 | 0.48  | 0.63 | 0.77 | 1.20 |

|                           |      |      |      |      |      |      |      |      |      |      |      |
|---------------------------|------|------|------|------|------|------|------|------|------|------|------|
| [Oct]-                    | 0.73 | 0.98 | 0.61 | 0.68 | 1.17 | 0.51 | 1.66 | 0.63 | 0.50 | 0.62 | 0.91 |
| [Oxa]-                    | 1.15 | 1.44 | 0.69 | 1.01 | 1.92 | 0.79 | 3.05 | 0.63 | 0.86 | 1.03 | 1.48 |
| [Prop]-                   | 0.96 | 1.15 | 0.49 | 0.79 | 1.50 | 0.56 | 2.43 | 0.48 | 0.55 | 0.72 | 1.11 |
| [Sal]-                    | 1.21 | 1.67 | 1.19 | 1.22 | 2.12 | 1.04 | 2.75 | 1.14 | 1.16 | 1.29 | 1.70 |
| [ThioSal]-                | 0.68 | 1.18 | 0.82 | 0.72 | 1.69 | 0.55 | 1.93 | 0.73 | 0.73 | 0.87 | 1.26 |
| [TFA]-                    | 0.78 | 1.51 | 1.15 | 0.93 | 2.17 | 0.85 | 2.36 | 1.14 | 1.01 | 1.10 | 1.57 |
| [TSAC]-                   | 0.11 | 0.58 | 0.62 | 0.33 | 0.86 | 0.40 | 0.60 | 0.67 | 0.44 | 0.44 | 0.59 |
| [B(F <sub>3</sub> )SI]-   | 0.00 | 0.29 | 0.31 | 0.19 | 0.43 | 0.17 | 0.07 | 0.33 | 0.15 | 0.20 | 0.28 |
| [MSA]-                    | 0.84 | 1.42 | 1.03 | 0.87 | 2.01 | 0.80 | 2.46 | 0.98 | 0.98 | 1.07 | 1.51 |
| [TFMI]                    | 0.13 | 0.62 | 0.66 | 0.36 | 0.92 | 0.43 | 0.67 | 0.70 | 0.49 | 0.48 | 0.64 |
| [DCN]-                    | 0.69 | 1.54 | 1.10 | 0.81 | 2.47 | 0.67 | 2.48 | 0.96 | 0.98 | 1.15 | 1.74 |
| [SbF <sub>6</sub> ]-      | 0.25 | 1.19 | 1.26 | 0.64 | 1.78 | 0.77 | 1.13 | 1.33 | 0.89 | 0.91 | 1.25 |
| [PF <sub>6</sub> ]-       | 0.45 | 1.62 | 1.58 | 0.88 | 2.48 | 0.99 | 1.83 | 1.62 | 1.21 | 1.25 | 1.75 |
| [NO <sub>3</sub> ]-       | 1.08 | 1.52 | 0.66 | 0.95 | 2.20 | 0.79 | 3.47 | 0.61 | 0.92 | 1.07 | 1.62 |
| [WOF <sub>5</sub> ]-      | 0.38 | 1.40 | 1.42 | 0.78 | 2.10 | 0.89 | 1.50 | 1.47 | 1.07 | 1.09 | 1.49 |
| [Phenolate]-              | 0.77 | 1.26 | 0.85 | 0.79 | 1.79 | 0.65 | 2.09 | 0.81 | 0.76 | 0.89 | 1.31 |
| [BF <sub>4</sub> ]-       | 0.90 | 1.96 | 1.45 | 1.12 | 2.98 | 1.12 | 3.20 | 1.42 | 1.36 | 1.48 | 2.15 |
| [SCN]-                    | 0.81 | 1.63 | 1.00 | 0.87 | 2.59 | 0.74 | 2.98 | 0.88 | 1.03 | 1.21 | 1.84 |
| [PhS]-                    | 0.67 | 1.23 | 0.85 | 0.70 | 1.81 | 0.57 | 2.06 | 0.79 | 0.75 | 0.88 | 1.31 |
| [TFMSM]-                  | 0.05 | 0.40 | 0.47 | 0.25 | 0.58 | 0.32 | 0.34 | 0.51 | 0.34 | 0.32 | 0.40 |
| [TCN]-                    | 0.29 | 1.13 | 0.98 | 0.52 | 1.94 | 0.42 | 1.47 | 0.84 | 0.74 | 0.90 | 1.35 |
| [DBPO <sub>4</sub> ]-     | 0.57 | 0.85 | 0.56 | 0.54 | 1.07 | 0.43 | 1.47 | 0.57 | 0.46 | 0.54 | 0.81 |
| [DEPO <sub>4</sub> ]-     | 0.76 | 1.11 | 0.70 | 0.70 | 1.47 | 0.57 | 2.04 | 0.69 | 0.64 | 0.75 | 1.11 |
| [DIsoPrPO <sub>4</sub> ]- | 0.68 | 1.01 | 0.67 | 0.65 | 1.29 | 0.53 | 1.74 | 0.68 | 0.57 | 0.67 | 0.98 |
| [DMPO <sub>4</sub> ]-     | 0.88 | 1.23 | 0.70 | 0.77 | 1.70 | 0.62 | 2.44 | 0.67 | 0.71 | 0.84 | 1.26 |
| [22-(ME)OHES]-            | 0.62 | 1.07 | 0.82 | 0.65 | 1.47 | 0.61 | 1.78 | 0.81 | 0.72 | 0.78 | 1.10 |
| [BzS]-                    | 0.74 | 1.27 | 0.89 | 0.76 | 1.82 | 0.64 | 2.22 | 0.83 | 0.84 | 0.94 | 1.35 |
| [EtSO <sub>4</sub> ]-     | 0.82 | 1.39 | 0.94 | 0.83 | 1.99 | 0.75 | 2.53 | 0.91 | 0.91 | 1.01 | 1.46 |



|                                     |      |      |      |      |      |      |      |      |      |      |      |
|-------------------------------------|------|------|------|------|------|------|------|------|------|------|------|
| [HSO <sub>3</sub> ]-                | 0.68 | 1.04 | 0.68 | 0.64 | 1.36 | 0.54 | 1.88 | 0.69 | 0.59 | 0.69 | 1.02 |
| [HSO <sub>4</sub> ]-                | 1.40 | 2.14 | 1.41 | 1.45 | 2.89 | 1.33 | 3.88 | 1.36 | 1.52 | 1.66 | 2.26 |
| [MetA]-                             | 1.02 | 1.67 | 1.29 | 1.12 | 2.24 | 1.01 | 2.60 | 1.23 | 1.20 | 1.31 | 1.75 |
| [MeSO <sub>4</sub> ]-               | 0.92 | 1.51 | 0.95 | 0.91 | 2.19 | 0.81 | 2.89 | 0.91 | 0.99 | 1.10 | 1.61 |
| [MeSO <sub>3</sub> ]-               | 1.01 | 1.24 | 0.49 | 0.78 | 1.73 | 0.60 | 2.96 | 0.45 | 0.67 | 0.82 | 1.27 |
| [F <sub>9</sub> BSO <sub>3</sub> ]- | 0.37 | 0.88 | 0.80 | 0.56 | 1.19 | 0.56 | 1.21 | 0.83 | 0.62 | 0.64 | 0.87 |
| [OctSO <sub>3</sub> ]-              | 0.59 | 0.89 | 0.60 | 0.55 | 1.15 | 0.46 | 1.60 | 0.61 | 0.49 | 0.58 | 0.87 |
| [NH <sub>2</sub> SO <sub>3</sub> ]- | 1.28 | 1.55 | 0.68 | 1.09 | 2.02 | 0.90 | 3.48 | 0.65 | 0.94 | 1.11 | 1.58 |
| [Tau]-                              | 1.04 | 1.37 | 0.74 | 0.91 | 1.83 | 0.76 | 2.80 | 0.72 | 0.82 | 0.96 | 1.39 |
| [Tosy]-                             | 0.67 | 1.13 | 0.79 | 0.67 | 1.61 | 0.56 | 2.00 | 0.74 | 0.72 | 0.81 | 1.19 |
| [CF <sub>3</sub> SO <sub>3</sub> ]- | 0.64 | 1.48 | 1.27 | 0.87 | 2.15 | 0.86 | 2.12 | 1.27 | 1.06 | 1.11 | 1.56 |

**Table S3 (continued...):** COSMO-RS predicted logarithmic activity coefficients of PET in different ILs at 363.15 K

|          | [4AO124Tz]+ | [1-OQ]+ | [4AP124Tz]+ | [3-MQunz]+ | [4APh124Tz]+ | [DEBS]+ | [DEMS]+ | [Qunz]+ | [TES]+ | [2EOMIM]+ | [3SP2VPy]+ |
|----------|-------------|---------|-------------|------------|--------------|---------|---------|---------|--------|-----------|------------|
| [Ala]-   | 1.72        | 0.51    | 2.27        | 1.05       | 1.59         | 0.77    | 1.06    | 1.39    | 0.88   | 2.01      | 2.26       |
| [Arg]-   | 1.61        | 0.66    | 2.08        | 1.26       | 1.53         | 1.01    | 1.40    | 1.58    | 1.19   | 2.03      | 2.20       |
| [Aspg]-  | 1.93        | 0.76    | 2.57        | 1.43       | 1.87         | 1.13    | 1.47    | 1.81    | 1.27   | 2.39      | 2.65       |
| [Cyst]-  | 1.48        | 0.45    | 2.05        | 1.13       | 1.48         | 0.77    | 1.23    | 1.54    | 0.98   | 2.07      | 2.26       |
| [Glumn]- | 1.75        | 0.67    | 2.30        | 1.31       | 1.67         | 1.03    | 1.42    | 1.66    | 1.20   | 2.18      | 2.38       |
| [Gly]-   | 1.87        | 0.53    | 2.47        | 0.94       | 1.74         | 0.68    | 0.72    | 1.25    | 0.65   | 1.98      | 2.34       |
| [His]-   | 1.66        | 0.71    | 2.23        | 1.48       | 1.64         | 1.16    | 1.69    | 1.87    | 1.42   | 2.31      | 2.46       |
| [Isole]- | 1.34        | 0.40    | 1.75        | 0.98       | 1.21         | 0.74    | 1.18    | 1.29    | 0.96   | 1.74      | 1.86       |
| [Leu]-   | 1.28        | 0.38    | 1.68        | 0.96       | 1.16         | 0.73    | 1.18    | 1.26    | 0.95   | 1.71      | 1.83       |
| [Lys]-   | 1.42        | 0.43    | 1.85        | 0.97       | 1.28         | 0.74    | 1.14    | 1.28    | 0.93   | 1.76      | 1.91       |
| [Met]-   | 1.28        | 0.35    | 1.73        | 0.95       | 1.23         | 0.66    | 1.11    | 1.30    | 0.87   | 1.75      | 1.90       |
| [Phe]-   | 1.15        | 0.31    | 1.56        | 0.92       | 1.10         | 0.66    | 1.15    | 1.25    | 0.90   | 1.66      | 1.79       |
| [Pro]-   | 1.59        | 0.44    | 2.06        | 0.98       | 1.43         | 0.73    | 1.09    | 1.31    | 0.89   | 1.84      | 2.03       |

|                              |      |      |      |      |      |      |      |      |      |      |      |
|------------------------------|------|------|------|------|------|------|------|------|------|------|------|
| [AspMA]-                     | 1.95 | 0.83 | 2.60 | 1.63 | 1.87 | 1.32 | 1.85 | 2.05 | 1.57 | 2.54 | 2.67 |
| [GluMA]-                     | 1.82 | 0.79 | 2.39 | 1.54 | 1.73 | 1.26 | 1.78 | 1.92 | 1.51 | 2.36 | 2.46 |
| [Ser]-                       | 2.03 | 0.79 | 2.69 | 1.43 | 1.92 | 1.15 | 1.45 | 1.80 | 1.27 | 2.41 | 2.65 |
| [Thr]-                       | 1.61 | 0.47 | 2.17 | 1.10 | 1.50 | 0.84 | 1.28 | 1.49 | 1.04 | 2.06 | 2.26 |
| [Try]-                       | 1.12 | 0.45 | 1.52 | 1.12 | 1.12 | 0.86 | 1.37 | 1.42 | 1.12 | 1.76 | 1.85 |
| [Tyro]-                      | 1.46 | 0.67 | 1.93 | 1.41 | 1.43 | 1.14 | 1.69 | 1.75 | 1.42 | 2.10 | 2.18 |
| [Val]-                       | 1.42 | 0.43 | 1.88 | 1.05 | 1.31 | 0.79 | 1.25 | 1.38 | 1.01 | 1.88 | 2.02 |
| [2Alm]-                      | 1.73 | 0.50 | 2.42 | 1.10 | 1.69 | 0.80 | 1.07 | 1.51 | 0.89 | 2.21 | 2.51 |
| [2MIm]-                      | 1.44 | 0.41 | 2.05 | 1.12 | 1.42 | 0.81 | 1.33 | 1.55 | 1.04 | 2.13 | 2.30 |
| [45DCIm]-                    | 0.69 | 0.16 | 1.19 | 1.05 | 0.79 | 0.76 | 1.61 | 1.49 | 1.19 | 1.94 | 2.01 |
| [56DMBeIm]-                  | 0.92 | 0.21 | 1.33 | 0.85 | 0.92 | 0.59 | 1.14 | 1.19 | 0.86 | 1.60 | 1.71 |
| [BeIm]-                      | 1.06 | 0.28 | 1.61 | 1.07 | 1.12 | 0.75 | 1.42 | 1.50 | 1.07 | 1.98 | 2.10 |
| [Sac]-                       | 1.26 | 0.36 | 1.85 | 1.18 | 1.31 | 0.83 | 1.49 | 1.62 | 1.15 | 2.06 | 2.21 |
| [2-Mbut]-                    | 1.48 | 0.41 | 1.95 | 0.99 | 1.39 | 0.71 | 1.09 | 1.33 | 0.87 | 1.84 | 2.02 |
| [2-BrMAcr]-                  | 1.15 | 0.31 | 1.66 | 1.12 | 1.25 | 0.68 | 1.28 | 1.56 | 0.97 | 1.95 | 2.08 |
| [2-BOA]-                     | 1.02 | 0.29 | 1.24 | 0.69 | 0.85 | 0.53 | 0.83 | 0.87 | 0.69 | 1.15 | 1.20 |
| [2-ClAce]-                   | 1.70 | 0.49 | 2.37 | 1.17 | 1.65 | 0.89 | 1.29 | 1.60 | 1.04 | 2.26 | 2.53 |
| [2-EBA]-                     | 1.36 | 0.41 | 1.74 | 0.95 | 1.23 | 0.72 | 1.11 | 1.23 | 0.91 | 1.67 | 1.80 |
| [2-EHA]-                     | 1.20 | 0.35 | 1.50 | 0.85 | 1.05 | 0.65 | 1.01 | 1.08 | 0.83 | 1.45 | 1.54 |
| [2-HOA]-                     | 0.88 | 0.23 | 1.06 | 0.58 | 0.71 | 0.45 | 0.70 | 0.73 | 0.58 | 0.97 | 1.02 |
| [2-(OH)MAcr]-                | 1.56 | 0.45 | 2.18 | 1.16 | 1.51 | 0.85 | 1.37 | 1.59 | 1.08 | 2.16 | 2.36 |
| [22-DMB]-                    | 1.36 | 0.41 | 1.74 | 0.97 | 1.23 | 0.74 | 1.15 | 1.26 | 0.94 | 1.71 | 1.84 |
| [3-(OH) <sub>2</sub> -MBut]- | 1.68 | 0.67 | 2.26 | 1.40 | 1.62 | 1.11 | 1.62 | 1.79 | 1.35 | 2.28 | 2.42 |
| [4-EOA]-                     | 1.14 | 0.31 | 1.41 | 0.76 | 0.97 | 0.58 | 0.58 | 0.98 | 0.75 | 1.31 | 1.38 |
| [Abt]-                       | 0.73 | 0.17 | 0.89 | 0.52 | 0.60 | 0.39 | 0.39 | 0.66 | 0.52 | 0.89 | 0.94 |
| [Ace]-                       | 1.87 | 0.52 | 2.43 | 0.88 | 1.74 | 0.62 | 0.62 | 1.15 | 0.55 | 1.89 | 2.26 |
| [AceSal]-                    | 1.23 | 0.33 | 1.70 | 0.99 | 1.21 | 0.71 | 0.71 | 1.35 | 0.96 | 1.77 | 1.91 |
| [Acryl]-                     | 1.74 | 0.48 | 2.34 | 1.03 | 1.67 | 0.73 | 0.73 | 1.40 | 0.79 | 2.05 | 2.35 |
| [Benzoate]-                  | 1.35 | 0.37 | 1.85 | 1.05 | 1.34 | 0.73 | 0.73 | 1.43 | 0.96 | 1.91 | 2.08 |

|                        |       |       |       |      |       |      |      |      |      |      |      |
|------------------------|-------|-------|-------|------|-------|------|------|------|------|------|------|
| [But]-                 | 1.60  | 0.46  | 2.07  | 0.99 | 1.46  | 0.74 | 0.74 | 1.31 | 0.87 | 1.86 | 2.05 |
| [C3C]-                 | 1.34  | 0.37  | 1.82  | 1.04 | 1.32  | 0.73 | 0.73 | 1.41 | 0.97 | 1.82 | 1.98 |
| [Crotonate]-           | 1.63  | 0.44  | 2.15  | 0.96 | 1.53  | 0.68 | 0.68 | 1.31 | 0.78 | 1.89 | 2.13 |
| [Dec]-                 | 1.12  | 0.31  | 1.38  | 0.74 | 0.94  | 0.57 | 0.57 | 0.95 | 0.73 | 1.27 | 1.34 |
| [For]-                 | 2.05  | 0.54  | 2.72  | 0.78 | 1.94  | 0.55 | 0.55 | 1.00 | 0.28 | 1.89 | 2.44 |
| [Gen]-                 | 2.19  | 1.12  | 2.88  | 2.03 | 2.16  | 1.69 | 1.69 | 2.45 | 1.96 | 2.86 | 2.97 |
| [Glyco]-               | 2.24  | 0.81  | 2.84  | 1.10 | 2.08  | 0.88 | 0.88 | 1.30 | 0.71 | 2.04 | 2.47 |
| [Hex]-                 | 1.41  | 0.40  | 1.78  | 0.93 | 1.24  | 0.70 | 0.70 | 1.21 | 0.88 | 1.65 | 1.78 |
| [Im2C]-                | 1.74  | 0.55  | 2.35  | 1.15 | 1.72  | 0.81 | 0.81 | 1.52 | 0.91 | 2.11 | 2.40 |
| [I3A]-                 | 1.26  | 0.50  | 1.71  | 1.19 | 1.27  | 0.91 | 0.91 | 1.53 | 1.17 | 1.90 | 2.01 |
| [Lac]-                 | 2.06  | 0.74  | 2.62  | 1.17 | 1.90  | 0.93 | 0.93 | 1.44 | 0.91 | 2.08 | 2.39 |
| [MCb]-                 | 1.88  | 0.51  | 2.54  | 1.05 | 1.78  | 0.75 | 0.75 | 1.44 | 0.80 | 2.13 | 2.47 |
| [N-MCb]-               | 1.85  | 0.51  | 2.41  | 0.89 | 1.71  | 0.63 | 0.63 | 1.19 | 0.60 | 1.89 | 2.24 |
| [NMeO]-                | 1.71  | 0.45  | 2.31  | 1.01 | 1.64  | 0.70 | 0.70 | 1.40 | 0.80 | 2.01 | 2.30 |
| [Oct]-                 | 1.25  | 0.35  | 1.56  | 0.83 | 1.08  | 0.64 | 0.64 | 1.08 | 0.82 | 1.45 | 1.54 |
| [Oxa]-                 | 2.01  | 0.68  | 2.75  | 1.29 | 1.98  | 0.96 | 0.96 | 1.68 | 0.97 | 2.38 | 2.76 |
| [Prop]-                | 1.71  | 0.50  | 2.23  | 0.99 | 1.59  | 0.73 | 0.73 | 1.31 | 0.80 | 1.94 | 2.19 |
| [Sal]-                 | 1.90  | 0.79  | 2.50  | 1.52 | 1.85  | 1.21 | 1.21 | 1.92 | 1.41 | 2.38 | 2.55 |
| [ThioSal]-             | 1.20  | 0.34  | 1.70  | 1.08 | 1.26  | 0.71 | 0.71 | 1.48 | 0.97 | 1.90 | 2.05 |
| [TFA]-                 | 1.36  | 0.38  | 2.02  | 1.30 | 1.34  | 1.03 | 1.03 | 1.82 | 1.42 | 2.41 | 2.57 |
| [TSAC]-                | 0.15  | -0.01 | 0.44  | 0.49 | 0.12  | 0.46 | 0.46 | 0.68 | 0.72 | 1.06 | 1.04 |
| [B(F <sub>5</sub> SI)- | -0.17 | -0.08 | -0.02 | 0.27 | -0.12 | 0.23 | 0.23 | 0.36 | 0.39 | 0.59 | 0.70 |
| [MSA]-                 | 1.51  | 0.45  | 2.17  | 1.24 | 1.50  | 0.92 | 0.92 | 1.70 | 1.20 | 2.24 | 2.43 |
| [TFMI]                 | 0.19  | 0.02  | 0.50  | 0.53 | 0.16  | 0.48 | 0.48 | 0.73 | 0.75 | 1.08 | 1.01 |
| [DCN]-                 | 1.25  | 0.29  | 2.07  | 1.40 | 1.44  | 0.87 | 0.87 | 2.07 | 1.28 | 2.62 | 2.80 |
| [SbF <sub>6</sub> ]-   | 0.34  | 0.05  | 0.85  | 1.00 | 0.37  | 0.90 | 0.90 | 1.44 | 1.47 | 1.99 | 1.88 |
| [PF <sub>6</sub> ]-    | 0.70  | 0.17  | 1.42  | 1.37 | 0.78  | 1.16 | 1.16 | 2.01 | 1.82 | 2.61 | 2.47 |
| [NO <sub>3</sub> ]-    | 2.07  | 0.57  | 3.04  | 1.31 | 2.07  | 0.96 | 0.96 | 1.84 | 0.98 | 2.67 | 3.10 |
| [WOF <sub>5</sub> ]-   | 0.57  | 0.14  | 1.17  | 1.19 | 0.62  | 1.02 | 2.19 | 1.71 | 1.62 | 2.26 | 2.15 |

|                                     |      |      |      |      |       |      |      |      |      |      |      |
|-------------------------------------|------|------|------|------|-------|------|------|------|------|------|------|
| [Phenolate]-                        | 1.28 | 0.38 | 1.84 | 1.10 | 1.29  | 0.81 | 1.38 | 1.52 | 1.07 | 2.05 | 2.20 |
| [BF <sub>4</sub> ]-                 | 1.59 | 0.45 | 2.64 | 1.67 | 1.68  | 1.33 | 2.29 | 2.43 | 1.77 | 3.16 | 3.36 |
| [SCN]-                              | 1.49 | 0.38 | 2.48 | 1.44 | 1.70  | 0.94 | 1.62 | 2.13 | 1.23 | 2.82 | 3.07 |
| [PhS]-                              | 1.22 | 0.30 | 1.80 | 1.08 | 1.26  | 0.74 | 1.38 | 1.53 | 1.04 | 2.04 | 2.20 |
| [TFMSM]-                            | 0.00 | 0.00 | 0.22 | 0.34 | -0.04 | 0.35 | 0.66 | 0.45 | 0.53 | 0.71 | 0.59 |
| [TCN]-                              | 0.58 | 0.05 | 1.17 | 1.09 | 0.82  | 0.57 | 1.51 | 1.64 | 1.05 | 2.03 | 2.12 |
| [DBPO <sub>4</sub> ]-               | 1.06 | 0.25 | 1.37 | 0.71 | 0.91  | 0.53 | 0.91 | 0.95 | 0.72 | 1.30 | 1.41 |
| [DEPO <sub>4</sub> ]-               | 1.42 | 0.37 | 1.87 | 0.94 | 1.29  | 0.70 | 1.15 | 1.29 | 0.91 | 1.76 | 1.92 |
| [DiIsoPrPO <sub>4</sub> ]-          | 1.22 | 0.31 | 1.60 | 0.86 | 1.09  | 0.64 | 1.08 | 1.15 | 0.86 | 1.55 | 1.68 |
| [DMPO <sub>4</sub> ]-               | 1.65 | 0.45 | 2.22 | 1.06 | 1.54  | 0.77 | 1.19 | 1.45 | 0.95 | 2.02 | 2.25 |
| [22-(ME)OHES]-                      | 1.14 | 0.30 | 1.59 | 0.91 | 1.07  | 0.70 | 1.22 | 1.24 | 0.95 | 1.69 | 1.83 |
| [BzS]-                              | 1.38 | 0.37 | 1.97 | 1.12 | 1.39  | 0.80 | 1.39 | 1.56 | 1.07 | 2.04 | 2.24 |
| [EtSO <sub>4</sub> ]-               | 1.55 | 0.42 | 2.23 | 1.19 | 1.51  | 0.88 | 1.48 | 1.67 | 1.15 | 2.25 | 2.46 |
| [HSO <sub>3</sub> ]-                | 1.30 | 0.31 | 1.72 | 0.86 | 1.15  | 0.65 | 1.11 | 1.19 | 0.87 | 1.63 | 1.78 |
| [HSO <sub>4</sub> ]-                | 2.33 | 0.88 | 3.39 | 1.90 | 2.33  | 1.50 | 1.97 | 2.51 | 1.70 | 3.20 | 3.48 |
| [MetA]-                             | 1.65 | 0.62 | 2.31 | 1.51 | 1.67  | 1.16 | 1.80 | 1.98 | 1.46 | 2.45 | 2.63 |
| [MeSO <sub>4</sub> ]-               | 1.74 | 0.49 | 2.53 | 1.30 | 1.72  | 0.96 | 1.51 | 1.82 | 1.19 | 2.48 | 2.74 |
| [MeSO <sub>3</sub> ]-               | 1.96 | 0.52 | 2.69 | 1.05 | 1.86  | 0.76 | 0.94 | 1.46 | 0.79 | 2.19 | 2.58 |
| [F <sub>9</sub> BSO <sub>3</sub> ]- | 0.64 | 0.15 | 1.02 | 0.75 | 0.57  | 0.66 | 1.21 | 1.01 | 0.95 | 1.38 | 1.46 |
| [OctSO <sub>3</sub> ]-              | 1.13 | 0.25 | 1.48 | 0.74 | 0.97  | 0.56 | 0.96 | 1.01 | 0.75 | 1.40 | 1.53 |
| [NH <sub>2</sub> SO <sub>3</sub> ]- | 2.26 | 0.76 | 3.14 | 1.36 | 2.21  | 1.06 | 1.05 | 1.75 | 1.00 | 2.55 | 3.02 |
| [Tau]-                              | 1.89 | 0.58 | 2.55 | 1.17 | 1.79  | 0.90 | 1.19 | 1.57 | 1.00 | 2.23 | 2.55 |
| [Tosy]-                             | 1.28 | 0.31 | 1.79 | 0.99 | 1.25  | 0.70 | 1.24 | 1.38 | 0.95 | 1.84 | 2.02 |
| [CF <sub>3</sub> SO <sub>3</sub> ]- | 1.12 | 0.30 | 1.78 | 1.27 | 1.12  | 1.01 | 1.94 | 1.79 | 1.47 | 2.33 | 2.41 |

**Table S3 (continued...):** COSMO-RS predicted logarithmic activity coefficients of PET in different ILs at 363.15 K

|             | [4SB3MIM]+ | [CMBIM]+ | [CMMIM]+ | [EUMIM]+ | [(OH)MIM]+ | [M33CEIM]+ | [VCBIM]+ | [DM(2OHE)A]+ | [TE(3SP)A]+ |
|-------------|------------|----------|----------|----------|------------|------------|----------|--------------|-------------|
| [Ala]-      | 2.29       | 2.72     | 3.66     | 2.09     | 3.21       | 2.49       | 1.84     | 3.09         | 2.12        |
| [Arg]-      | 2.24       | 2.51     | 3.29     | 2.03     | 3.00       | 2.44       | 1.84     | 2.83         | 2.09        |
| [Aspg]-     | 2.65       | 3.04     | 4.14     | 2.45     | 3.70       | 2.89       | 2.15     | 3.46         | 2.46        |
| [Cyst]-     | 2.31       | 2.54     | 3.64     | 2.08     | 3.30       | 2.56       | 1.81     | 2.98         | 2.09        |
| [Glumn]-    | 2.41       | 2.74     | 3.67     | 2.22     | 3.32       | 2.63       | 1.96     | 3.11         | 2.24        |
| [Gly]-      | 2.31       | 2.93     | 3.82     | 2.09     | 3.15       | 2.43       | 1.87     | 3.19         | 2.13        |
| [His]-      | 2.53       | 2.69     | 3.74     | 2.33     | 3.50       | 2.79       | 2.04     | 3.15         | 2.34        |
| [Isole]-    | 1.95       | 2.15     | 2.85     | 1.75     | 2.63       | 2.14       | 1.58     | 2.51         | 1.82        |
| [Leu]-      | 1.93       | 2.09     | 2.80     | 1.71     | 2.59       | 2.11       | 1.55     | 2.46         | 1.79        |
| [Lys]-      | 1.98       | 2.25     | 2.93     | 1.76     | 2.66       | 2.15       | 1.60     | 2.55         | 1.85        |
| [Met]-      | 1.96       | 2.15     | 2.95     | 1.74     | 2.68       | 2.16       | 1.55     | 2.48         | 1.79        |
| [Phe]-      | 1.87       | 1.96     | 2.71     | 1.66     | 2.50       | 2.05       | 1.47     | 2.30         | 1.71        |
| [Pro]-      | 2.08       | 2.45     | 3.21     | 1.90     | 2.89       | 2.27       | 1.69     | 2.77         | 1.93        |
| [AspMA]-    | 2.75       | 2.99     | 4.19     | 2.64     | 3.92       | 3.06       | 2.24     | 3.57         | 2.56        |
| [GluMA]-    | 2.55       | 2.75     | 3.76     | 2.44     | 3.54       | 2.83       | 2.10     | 3.27         | 2.38        |
| [Ser]-      | 2.67       | 3.12     | 4.22     | 2.51     | 3.77       | 2.92       | 2.18     | 3.59         | 2.50        |
| [Thr]-      | 2.32       | 2.60     | 3.61     | 2.12     | 3.27       | 2.56       | 1.83     | 3.06         | 2.16        |
| [Try]-      | 1.95       | 1.92     | 2.68     | 1.73     | 2.53       | 2.12       | 1.56     | 2.30         | 1.79        |
| [Tyro]-     | 2.28       | 2.31     | 3.19     | 2.12     | 3.05       | 2.51       | 1.86     | 2.77         | 2.11        |
| [Val]-      | 2.11       | 2.31     | 3.15     | 1.90     | 2.89       | 2.32       | 1.69     | 2.73         | 1.96        |
| [2Alm]-     | 2.50       | 2.94     | 4.18     | 2.27     | 3.61       | 2.72       | 1.95     | 3.40         | 2.29        |
| [2MIm]-     | 2.38       | 2.53     | 3.77     | 2.15     | 3.44       | 2.65       | 1.82     | 3.11         | 2.17        |
| [45DCIm]-   | 2.20       | 1.77     | 2.95     | 1.86     | 2.83       | 2.44       | 1.57     | 2.49         | 1.99        |
| [56DMBeIm]- | 1.82       | 1.76     | 2.61     | 1.57     | 2.41       | 1.99       | 1.38     | 2.20         | 1.65        |
| [BeIm]-     | 2.22       | 2.11     | 3.33     | 1.96     | 3.13       | 2.48       | 1.65     | 2.72         | 2.00        |
| [Sac]-      | 2.29       | 2.29     | 3.46     | 2.10     | 3.24       | 2.56       | 1.74     | 2.81         | 2.07        |
| [2-Mbut]-   | 2.08       | 2.35     | 3.20     | 1.89     | 2.89       | 2.27       | 1.66     | 2.70         | 1.90        |

|                              |      |      |      |      |      |      |      |      |      |
|------------------------------|------|------|------|------|------|------|------|------|------|
| [2-BrMAcr]-                  | 2.16 | 2.17 | 3.31 | 1.93 | 3.11 | 2.43 | 1.66 | 2.62 | 1.90 |
| [2-BOA]-                     | 1.29 | 1.49 | 1.76 | 1.15 | 1.68 | 1.40 | 1.12 | 1.65 | 1.22 |
| [2-ClAce]-                   | 2.58 | 2.86 | 4.20 | 2.36 | 3.77 | 2.83 | 1.99 | 3.43 | 2.37 |
| [2-EBA]-                     | 1.89 | 2.11 | 2.75 | 1.70 | 2.53 | 2.06 | 1.55 | 2.44 | 1.76 |
| [2-EHA]-                     | 1.63 | 1.83 | 2.29 | 1.46 | 2.14 | 1.78 | 1.36 | 2.09 | 1.53 |
| [2-HOA]-                     | 1.09 | 1.28 | 1.48 | 0.97 | 1.43 | 1.20 | 0.96 | 1.41 | 1.04 |
| [2-(OH)MAcr]-                | 2.43 | 2.62 | 3.84 | 2.24 | 3.51 | 2.70 | 1.88 | 3.17 | 2.23 |
| [22-DMB]-                    | 1.94 | 2.13 | 2.81 | 1.74 | 2.59 | 2.11 | 1.58 | 2.49 | 1.80 |
| [3-(OH) <sub>2</sub> -MBut]- | 2.50 | 2.67 | 3.78 | 2.34 | 3.52 | 2.77 | 2.01 | 3.21 | 2.32 |
| [4-EOA]-                     | 1.46 | 1.69 | 2.05 | 1.32 | 1.93 | 1.60 | 1.24 | 1.88 | 1.38 |
| [Abt]-                       | 1.03 | 1.14 | 1.36 | 0.88 | 1.30 | 1.11 | 0.88 | 1.29 | 0.96 |
| [Ace]-                       | 2.23 | 2.88 | 3.70 | 2.02 | 2.99 | 2.31 | 1.82 | 3.09 | 2.06 |
| [AceSal]-                    | 1.98 | 2.06 | 2.93 | 1.81 | 2.70 | 2.18 | 1.54 | 2.45 | 1.80 |
| [Acryl]-                     | 2.36 | 2.80 | 3.88 | 2.15 | 3.36 | 2.54 | 1.87 | 3.17 | 2.15 |
| [Benzoate]-                  | 2.15 | 2.27 | 3.28 | 1.95 | 3.01 | 2.37 | 1.67 | 2.70 | 1.94 |
| [But]-                       | 2.11 | 2.47 | 3.26 | 1.92 | 2.91 | 2.29 | 1.71 | 2.80 | 1.96 |
| [C3C]-                       | 2.03 | 2.17 | 3.03 | 1.88 | 2.78 | 2.23 | 1.59 | 2.50 | 1.84 |
| [Crotonate]-                 | 2.15 | 2.56 | 3.44 | 1.97 | 3.02 | 2.33 | 1.73 | 2.87 | 1.97 |
| [Dec]-                       | 1.42 | 1.65 | 1.98 | 1.28 | 1.87 | 1.55 | 1.21 | 1.83 | 1.34 |
| [For]-                       | 2.33 | 3.21 | 4.00 | 2.08 | 2.87 | 2.29 | 1.91 | 3.30 | 2.14 |
| [Gen]-                       | 3.04 | 3.24 | 4.52 | 2.96 | 4.30 | 3.38 | 2.53 | 3.83 | 2.82 |
| [Glyco]-                     | 2.39 | 3.23 | 3.84 | 2.21 | 3.00 | 2.41 | 2.05 | 3.31 | 2.23 |
| [Hex]-                       | 1.86 | 2.13 | 2.72 | 1.68 | 2.50 | 2.03 | 1.53 | 2.42 | 1.73 |
| [Im2C]-                      | 2.39 | 2.81 | 3.88 | 2.19 | 3.40 | 2.59 | 1.91 | 3.13 | 2.17 |
| [I3A]-                       | 2.10 | 2.11 | 2.99 | 1.90 | 2.80 | 2.30 | 1.67 | 2.52 | 1.92 |
| [Lac]-                       | 2.37 | 3.00 | 3.76 | 2.21 | 3.18 | 2.50 | 1.99 | 3.23 | 2.21 |
| [MCb]-                       | 2.46 | 3.00 | 4.11 | 2.26 | 3.53 | 2.66 | 1.95 | 3.37 | 2.26 |
| [N-MCb]-                     | 2.21 | 2.85 | 3.65 | 2.00 | 3.00 | 2.32 | 1.80 | 3.05 | 2.04 |
| [NMeO]-                      | 2.29 | 2.74 | 3.75 | 2.11 | 3.27 | 2.49 | 1.82 | 3.06 | 2.09 |

|                           |      |      |      |      |      |      |      |      |      |
|---------------------------|------|------|------|------|------|------|------|------|------|
| [Oct]-                    | 1.62 | 1.86 | 2.31 | 1.47 | 2.15 | 1.77 | 1.36 | 2.09 | 1.52 |
| [Oxa]-                    | 2.71 | 3.26 | 4.54 | 2.51 | 3.87 | 2.92 | 2.17 | 3.66 | 2.49 |
| [Prop]-                   | 2.23 | 2.67 | 3.55 | 2.02 | 3.09 | 2.39 | 1.80 | 3.01 | 2.06 |
| [Sal]-                    | 2.59 | 2.88 | 3.95 | 2.47 | 3.66 | 2.85 | 2.12 | 3.31 | 2.39 |
| [ThioSal]-                | 2.11 | 2.15 | 3.20 | 1.90 | 2.97 | 2.35 | 1.63 | 2.58 | 1.89 |
| [TFA]-                    | 2.73 | 2.59 | 4.16 | 2.47 | 4.02 | 3.09 | 2.01 | 3.43 | 2.52 |
| [TSAC]-                   | 1.23 | 0.74 | 1.36 | 1.01 | 1.16 | 1.28 | 0.85 | 1.31 | 1.12 |
| [B(F <sub>5</sub> )SI]-   | 0.82 | 0.41 | 0.78 | 0.49 | 0.67 | 0.80 | 0.56 | 0.73 | 0.76 |
| [MSA]-                    | 2.50 | 2.62 | 3.91 | 2.31 | 3.61 | 2.79 | 1.90 | 3.21 | 2.29 |
| [TFMI]                    | 1.19 | 0.70 | 1.35 | 1.05 | 1.13 | 1.28 | 0.83 | 1.32 | 1.08 |
| [DCN]-                    | 2.90 | 2.80 | 4.86 | 2.62 | 4.73 | 3.39 | 2.10 | 3.67 | 2.57 |
| [SbF <sub>6</sub> ]-      | 2.19 | 1.30 | 2.39 | 1.88 | 2.21 | 2.43 | 1.48 | 2.35 | 2.02 |
| [PF <sub>6</sub> ]-       | 2.80 | 1.93 | 3.66 | 2.56 | 3.67 | 3.27 | 1.90 | 3.30 | 2.56 |
| [NO <sub>3</sub> ]-       | 3.05 | 3.59 | 5.50 | 2.87 | 4.69 | 3.36 | 2.34 | 4.29 | 2.80 |
| [WOF <sub>5</sub> ]-      | 2.47 | 1.65 | 2.95 | 2.20 | 2.86 | 2.79 | 1.70 | 2.75 | 2.27 |
| [Phenolate]-              | 2.30 | 2.32 | 3.54 | 2.06 | 3.28 | 2.56 | 1.74 | 2.92 | 2.10 |
| [BF <sub>4</sub> ]-       | 3.50 | 3.36 | 6.13 | 3.30 | 6.01 | 4.13 | 2.50 | 4.72 | 3.21 |
| [SCN]-                    | 3.12 | 3.19 | 5.66 | 2.88 | 5.30 | 3.62 | 2.26 | 4.20 | 2.77 |
| [PhS]-                    | 2.29 | 2.32 | 3.55 | 2.03 | 3.32 | 2.56 | 1.72 | 2.87 | 2.06 |
| [TFMSM]-                  | 0.74 | 0.28 | 0.71 | 0.68 | 0.48 | 0.78 | 0.52 | 0.82 | 0.66 |
| [TCN]-                    | 2.25 | 1.87 | 3.33 | 1.92 | 3.23 | 2.61 | 1.59 | 2.54 | 1.96 |
| [DBPO <sub>4</sub> ]-     | 1.48 | 1.67 | 2.11 | 1.32 | 1.95 | 1.62 | 1.21 | 1.88 | 1.39 |
| [DEPO <sub>4</sub> ]-     | 1.98 | 2.24 | 2.98 | 1.81 | 2.72 | 2.18 | 1.58 | 2.57 | 1.84 |
| [DIsoPrPO <sub>4</sub> ]- | 1.76 | 1.95 | 2.55 | 1.58 | 2.35 | 1.93 | 1.42 | 2.24 | 1.64 |
| [DMPO <sub>4</sub> ]-     | 2.29 | 2.63 | 3.62 | 2.11 | 3.24 | 2.52 | 1.80 | 3.03 | 2.11 |
| [22-(ME)OHES]-            | 1.92 | 1.95 | 2.79 | 1.72 | 2.56 | 2.10 | 1.45 | 2.38 | 1.77 |
| [BzS]-                    | 2.30 | 2.42 | 3.56 | 2.10 | 3.29 | 2.56 | 1.76 | 2.88 | 2.09 |
| [EtSO <sub>4</sub> ]-     | 2.53 | 2.70 | 4.05 | 2.34 | 3.74 | 2.84 | 1.92 | 3.32 | 2.32 |

|                                     |      |      |      |      |      |      |      |      |      |
|-------------------------------------|------|------|------|------|------|------|------|------|------|
| [HSO <sub>3</sub> ]-                | 1.85 | 2.09 | 2.76 | 1.67 | 2.54 | 2.04 | 1.47 | 2.39 | 1.73 |
| [HSO <sub>4</sub> ]-                | 3.50 | 3.90 | 6.05 | 3.40 | 5.54 | 3.96 | 2.73 | 4.81 | 3.22 |
| [MetA]-                             | 2.69 | 2.80 | 4.10 | 2.49 | 3.86 | 3.00 | 2.10 | 3.35 | 2.46 |
| [MeSO <sub>4</sub> ]-               | 2.79 | 3.03 | 4.65 | 2.60 | 4.25 | 3.13 | 2.10 | 3.73 | 2.55 |
| [MeSO <sub>3</sub> ]-               | 2.53 | 3.15 | 4.29 | 2.34 | 3.65 | 2.73 | 2.00 | 3.50 | 2.33 |
| [F <sub>9</sub> BSO <sub>3</sub> ]- | 1.61 | 1.39 | 2.15 | 1.38 | 2.05 | 1.75 | 1.18 | 1.89 | 1.51 |
| [OctSO <sub>3</sub> ]-              | 1.60 | 1.80 | 2.33 | 1.42 | 2.14 | 1.76 | 1.28 | 2.04 | 1.50 |
| [NH <sub>2</sub> SO <sub>3</sub> ]- | 2.93 | 3.68 | 4.99 | 2.72 | 4.12 | 3.11 | 2.35 | 4.07 | 2.71 |
| [Tau]-                              | 2.54 | 3.02 | 4.11 | 2.32 | 3.59 | 2.75 | 2.01 | 3.41 | 2.35 |
| [Tosy]-                             | 2.08 | 2.21 | 3.16 | 1.88 | 2.91 | 2.30 | 1.60 | 2.60 | 1.89 |
| [CF <sub>3</sub> SO <sub>3</sub> ]- | 2.61 | 2.30 | 3.83 | 2.37 | 3.74 | 2.97 | 1.88 | 3.19 | 2.39 |

**Table S3 (continued...):** COSMO-RS predicted logarithmic activity coefficients of PET in different ILs at 363.15 K

|          | [2ETeG]+ | [TMGH]+ | [BAMDMG]+ | [C(NH <sub>2</sub> ) <sub>3</sub> ]+ | [HMG]+ | [TeMDBG]+ | [TeMDOG]+ | [C <sub>2</sub> (OH)DMIM]+ | [APrMIM]+ | [MAEIM]+ |
|----------|----------|---------|-----------|--------------------------------------|--------|-----------|-----------|----------------------------|-----------|----------|
| [Ala]-   | 1.07     | 0.84    | 0.23      | 5.16                                 | 0.70   | 0.29      | 0.12      | 1.40                       | 1.28      | 1.44     |
| [Arg]-   | 1.25     | 1.26    | 0.38      | 4.10                                 | 1.03   | 0.53      | 0.27      | 1.63                       | 1.48      | 1.65     |
| [Aspg]-  | 1.44     | 1.28    | 0.44      | 5.93                                 | 1.10   | 0.61      | 0.31      | 1.78                       | 1.63      | 1.82     |
| [Cyst]-  | 1.06     | 1.08    | 0.17      | 4.67                                 | 0.80   | 0.26      | 0.05      | 1.56                       | 1.37      | 1.57     |
| [Glumn]- | 1.30     | 1.26    | 0.38      | 4.98                                 | 1.02   | 0.53      | 0.27      | 1.69                       | 1.53      | 1.72     |
| [Gly]-   | 1.02     | 0.44    | 0.24      | 5.86                                 | 0.52   | 0.27      | 0.13      | 1.15                       | 1.09      | 1.19     |
| [His]-   | 1.41     | 1.56    | 0.41      | 4.70                                 | 1.21   | 0.59      | 0.29      | 1.92                       | 1.73      | 1.94     |
| [Isole]- | 0.96     | 1.04    | 0.19      | 3.42                                 | 0.76   | 0.26      | 0.09      | 1.42                       | 1.26      | 1.43     |
| [Leu]-   | 0.94     | 1.05    | 0.18      | 3.30                                 | 0.75   | 0.24      | 0.08      | 1.41                       | 1.25      | 1.42     |
| [Lys]-   | 0.96     | 0.99    | 0.19      | 3.69                                 | 0.75   | 0.27      | 0.09      | 1.38                       | 1.23      | 1.40     |
| [Met]-   | 0.89     | 0.99    | 0.11      | 3.57                                 | 0.70   | 0.18      | 0.01      | 1.37                       | 1.20      | 1.38     |
| [Phe]-   | 0.86     | 1.04    | 0.10      | 3.20                                 | 0.71   | 0.17      | 0.00      | 1.37                       | 1.20      | 1.37     |
| [Pro]-   | 0.97     | 0.90    | 0.18      | 4.39                                 | 0.68   | 0.24      | 0.08      | 1.36                       | 1.23      | 1.41     |



|                              |      |      |      |      |      |      |       |      |      |      |
|------------------------------|------|------|------|------|------|------|-------|------|------|------|
| [AspMA]-                     | 1.62 | 1.72 | 0.53 | 6.04 | 1.36 | 0.72 | 0.40  | 2.10 | 1.92 | 2.17 |
| [GluMA]-                     | 1.53 | 1.68 | 0.52 | 5.17 | 1.31 | 0.69 | 0.40  | 2.01 | 1.84 | 2.06 |
| [Ser]-                       | 1.48 | 1.25 | 0.48 | 6.32 | 1.09 | 0.62 | 0.36  | 1.78 | 1.65 | 1.84 |
| [Thr]-                       | 1.10 | 1.13 | 0.22 | 5.03 | 0.84 | 0.31 | 0.10  | 1.58 | 1.41 | 1.62 |
| [Try]-                       | 1.04 | 1.29 | 0.24 | 2.91 | 0.94 | 0.36 | 0.13  | 1.56 | 1.37 | 1.54 |
| [Tyro]-                      | 1.35 | 1.61 | 0.43 | 3.78 | 1.22 | 0.59 | 0.31  | 1.88 | 1.69 | 1.89 |
| [Val]-                       | 1.03 | 1.10 | 0.21 | 3.88 | 0.81 | 0.28 | 0.10  | 1.51 | 1.34 | 1.53 |
| [2Alm]-                      | 1.13 | 0.83 | 0.19 | 6.32 | 0.73 | 0.27 | 0.06  | 1.45 | 1.33 | 1.50 |
| [2MIm]-                      | 1.07 | 1.16 | 0.15 | 5.07 | 0.83 | 0.23 | 0.02  | 1.62 | 1.43 | 1.66 |
| [45DCIm]-                    | 0.93 | 1.57 | 0.01 | 2.24 | 0.94 | 0.13 | -0.09 | 1.82 | 1.51 | 1.79 |
| [56DMBeIm]-                  | 0.79 | 1.05 | 0.03 | 2.87 | 0.67 | 0.09 | -0.08 | 1.36 | 1.17 | 1.34 |
| [BeIm]-                      | 0.98 | 1.33 | 0.06 | 3.84 | 0.85 | 0.15 | -0.07 | 1.67 | 1.43 | 1.67 |
| [Sac]-                       | 1.05 | 1.43 | 0.09 | 4.54 | 0.94 | 0.24 | -0.02 | 1.74 | 1.50 | 1.75 |
| [2-Mbut]-                    | 0.95 | 0.91 | 0.17 | 4.22 | 0.67 | 0.21 | 0.06  | 1.37 | 1.23 | 1.40 |
| [2-BrMAcr]-                  | 0.93 | 1.18 | 0.06 | 3.74 | 0.77 | 0.13 | -0.05 | 1.58 | 1.34 | 1.57 |
| [2-BOA]-                     | 0.67 | 0.69 | 0.13 | 1.90 | 0.52 | 0.16 | 0.05  | 0.98 | 0.89 | 0.98 |
| [2-ClAce]-                   | 1.18 | 1.09 | 0.23 | 6.28 | 0.84 | 0.32 | 0.10  | 1.63 | 1.46 | 1.67 |
| [2-EBA]-                     | 0.93 | 0.95 | 0.20 | 3.24 | 0.70 | 0.24 | 0.10  | 1.35 | 1.20 | 1.36 |
| [2-EHA]-                     | 0.83 | 0.87 | 0.17 | 2.58 | 0.64 | 0.21 | 0.08  | 1.21 | 1.09 | 1.22 |
| [2-HOA]-                     | 0.58 | 0.57 | 0.10 | 1.58 | 0.43 | 0.12 | 0.03  | 0.84 | 0.76 | 0.83 |
| [2-(OH)MAcr]-                | 1.13 | 1.22 | 0.20 | 5.44 | 0.87 | 0.29 | 0.08  | 1.67 | 1.48 | 1.71 |
| [22-DMB]-                    | 0.96 | 1.00 | 0.21 | 3.27 | 0.73 | 0.26 | 0.11  | 1.39 | 1.24 | 1.41 |
| [3-(OH) <sub>2</sub> -MBut]- | 1.38 | 1.49 | 0.41 | 5.08 | 1.14 | 0.55 | 0.29  | 1.87 | 1.69 | 1.91 |
| [4-EOA]-                     | 0.73 | 0.77 | 0.13 | 2.39 | 0.57 | 0.16 | 0.04  | 1.09 | 0.98 | 1.10 |
| [Abt]-                       | 0.52 | 0.53 | 0.07 | 1.30 | 0.38 | 0.08 | 0.00  | 0.78 | 0.69 | 0.76 |
| [Ace]-                       | 0.96 | 0.27 | 0.24 | 5.71 | 0.41 | 0.24 | 0.13  | 1.02 | 0.99 | 1.06 |
| [AceSal]-                    | 0.91 | 1.14 | 0.11 | 3.83 | 0.77 | 0.20 | 0.00  | 1.46 | 1.28 | 1.48 |
| [Acryl]-                     | 1.04 | 0.71 | 0.21 | 5.89 | 0.61 | 0.25 | 0.09  | 1.33 | 1.22 | 1.37 |
| [Benzoate]-                  | 0.96 | 1.09 | 0.13 | 4.21 | 0.75 | 0.20 | 0.02  | 1.49 | 1.31 | 1.52 |

|                        |      |       |       |       |      |       |       |      |      |      |
|------------------------|------|-------|-------|-------|------|-------|-------|------|------|------|
| [But]-                 | 0.99 | 0.85  | 0.22  | 4.30  | 0.67 | 0.26  | 0.11  | 1.35 | 1.23 | 1.39 |
| [C3C]-                 | 0.94 | 1.14  | 0.12  | 4.14  | 0.78 | 0.23  | 0.01  | 1.47 | 1.29 | 1.49 |
| [Crotonate]-           | 0.95 | 0.75  | 0.18  | 4.92  | 0.59 | 0.21  | 0.06  | 1.29 | 1.17 | 1.33 |
| [Dec]-                 | 0.72 | 0.75  | 0.13  | 2.30  | 0.56 | 0.16  | 0.04  | 1.07 | 0.96 | 1.07 |
| [For]-                 | 0.95 | -0.25 | 0.26  | 7.15  | 0.22 | 0.25  | 0.13  | 0.73 | 0.79 | 0.76 |
| [Gen]-                 | 1.99 | 2.12  | 0.79  | 6.41  | 1.73 | 1.04  | 0.64  | 2.45 | 2.26 | 2.51 |
| [Glyco]-               | 1.27 | 0.31  | 0.52  | 6.32  | 0.61 | 0.57  | 0.39  | 1.09 | 1.12 | 1.14 |
| [Hex]-                 | 0.90 | 0.91  | 0.18  | 3.35  | 0.68 | 0.23  | 0.08  | 1.31 | 1.18 | 1.33 |
| [Im2C]-                | 1.12 | 0.87  | 0.25  | 5.75  | 0.74 | 0.33  | 0.12  | 1.43 | 1.30 | 1.47 |
| [I3A]-                 | 1.12 | 1.34  | 0.27  | 3.46  | 0.97 | 0.39  | 0.16  | 1.63 | 1.44 | 1.63 |
| [Lac]-                 | 1.26 | 0.71  | 0.46  | 5.80  | 0.75 | 0.52  | 0.34  | 1.34 | 1.29 | 1.39 |
| [MCb]-                 | 1.08 | 0.69  | 0.22  | 6.63  | 0.63 | 0.27  | 0.09  | 1.36 | 1.25 | 1.41 |
| [N-MCb]-               | 0.96 | 0.38  | 0.22  | 5.67  | 0.45 | 0.24  | 0.11  | 1.07 | 1.03 | 1.12 |
| [NMeO]-                | 0.99 | 0.78  | 0.17  | 5.75  | 0.62 | 0.22  | 0.05  | 1.35 | 1.22 | 1.39 |
| [Oct]-                 | 0.81 | 0.85  | 0.15  | 2.73  | 0.62 | 0.19  | 0.06  | 1.19 | 1.07 | 1.21 |
| [Oxa]-                 | 1.33 | 0.83  | 0.35  | 7.42  | 0.83 | 0.47  | 0.22  | 1.52 | 1.42 | 1.56 |
| [Prop]-                | 1.02 | 0.71  | 0.24  | 4.97  | 0.62 | 0.27  | 0.12  | 1.30 | 1.19 | 1.34 |
| [Sal]-                 | 1.49 | 1.50  | 0.49  | 5.61  | 1.20 | 0.64  | 0.36  | 1.90 | 1.74 | 1.95 |
| [ThioSal]-             | 0.95 | 1.17  | 0.09  | 3.84  | 0.78 | 0.18  | -0.03 | 1.53 | 1.32 | 1.53 |
| [TFA]-                 | 1.25 | 1.75  | 0.18  | 5.21  | 1.12 | 0.33  | 0.06  | 2.09 | 1.78 | 2.12 |
| [TSAC]-                | 0.44 | 0.94  | -0.06 | 1.06  | 0.57 | 0.09  | -0.06 | 1.05 | 0.92 | 1.04 |
| [B(F <sub>5</sub> SI)- | 0.28 | 0.46  | -0.05 | -0.14 | 0.27 | -0.01 | -0.10 | 0.66 | 0.52 | 0.55 |
| [MSA]-                 | 1.19 | 1.45  | 0.16  | 5.53  | 1.01 | 0.33  | 0.06  | 1.81 | 1.59 | 1.85 |
| [TFMI]                 | 0.46 | 0.99  | -0.05 | 1.26  | 0.61 | 0.11  | -0.04 | 1.06 | 0.96 | 1.07 |
| [DCN]-                 | 1.18 | 1.64  | -0.01 | 5.62  | 1.04 | 0.13  | -0.15 | 2.11 | 1.76 | 2.13 |
| [SbF <sub>6</sub> ]-   | 0.84 | 1.95  | -0.08 | 0.27  | 1.14 | 0.18  | -0.08 | 2.02 | 1.72 | 2.04 |
| [PF <sub>6</sub> ]-    | 1.18 | 2.47  | -0.03 | 0.48  | 1.44 | 0.28  | -0.06 | 2.52 | 2.13 | 2.60 |
| [NO <sub>3</sub> ]-    | 1.36 | 0.84  | 0.24  | 10.70 | 0.84 | 0.38  | 0.11  | 1.65 | 1.53 | 1.71 |
| [WOF <sub>5</sub> ]-   | 1.04 | 2.20  | -0.02 | 0.89  | 1.29 | 0.25  | -0.04 | 2.26 | 1.92 | 2.30 |

|                                     |      |      |       |       |      |       |       |      |      |      |
|-------------------------------------|------|------|-------|-------|------|-------|-------|------|------|------|
| [Phenolate]-                        | 1.05 | 1.25 | 0.16  | 4.49  | 0.85 | 0.24  | 0.04  | 1.65 | 1.43 | 1.67 |
| [BF <sub>4</sub> ]-                 | 1.56 | 2.10 | 0.13  | 7.72  | 1.43 | 0.42  | 0.04  | 2.58 | 2.22 | 2.67 |
| [SCN]-                              | 1.32 | 1.44 | 0.03  | 8.12  | 1.03 | 0.19  | -0.11 | 2.04 | 1.77 | 2.09 |
| [PhS]-                              | 1.00 | 1.27 | 0.04  | 4.40  | 0.83 | 0.13  | -0.08 | 1.65 | 1.41 | 1.66 |
| [TFMSM]-                            | 0.28 | 0.67 | -0.06 | 0.66  | 0.43 | 0.10  | -0.02 | 0.69 | 0.67 | 0.73 |
| [TCN]-                              | 0.78 | 1.50 | -0.19 | 2.61  | 0.83 | -0.06 | -0.28 | 1.81 | 1.45 | 1.77 |
| [DBPO <sub>4</sub> ]-               | 0.68 | 0.80 | 0.08  | 2.67  | 0.56 | 0.13  | 0.00  | 1.10 | 0.97 | 1.10 |
| [DEPO <sub>4</sub> ]-               | 0.91 | 1.02 | 0.14  | 4.07  | 0.71 | 0.21  | 0.04  | 1.40 | 1.24 | 1.43 |
| [DiIsoPrPO <sub>4</sub> ]-          | 0.82 | 0.96 | 0.12  | 3.25  | 0.67 | 0.18  | 0.03  | 1.30 | 1.14 | 1.30 |
| [DMPO <sub>4</sub> ]-               | 1.03 | 1.02 | 0.18  | 5.33  | 0.75 | 0.26  | 0.07  | 1.50 | 1.34 | 1.54 |
| [22-(ME)OHES]-                      | 0.89 | 1.18 | 0.09  | 3.63  | 0.80 | 0.23  | 0.02  | 1.44 | 1.26 | 1.45 |
| [BzS]-                              | 1.03 | 1.29 | 0.10  | 4.82  | 0.87 | 0.23  | 0.00  | 1.66 | 1.44 | 1.68 |
| [EtSO <sub>4</sub> ]-               | 1.15 | 1.38 | 0.15  | 5.93  | 0.95 | 0.29  | 0.04  | 1.79 | 1.57 | 1.83 |
| [HSO <sub>3</sub> ]-                | 0.84 | 0.99 | 0.10  | 3.73  | 0.68 | 0.17  | 0.01  | 1.34 | 1.18 | 1.35 |
| [HSO <sub>4</sub> ]-                | 1.89 | 1.74 | 0.47  | 11.09 | 1.49 | 0.74  | 0.33  | 2.37 | 2.18 | 2.47 |
| [MetA]-                             | 1.41 | 1.69 | 0.29  | 5.48  | 1.24 | 0.51  | 0.16  | 2.04 | 1.80 | 2.07 |
| [MeSO <sub>4</sub> ]-               | 1.27 | 1.36 | 0.18  | 7.35  | 0.99 | 0.34  | 0.07  | 1.87 | 1.65 | 1.92 |
| [MeSO <sub>3</sub> ]-               | 1.11 | 0.68 | 0.21  | 7.29  | 0.64 | 0.29  | 0.09  | 1.36 | 1.26 | 1.42 |
| [F <sub>9</sub> BSO <sub>3</sub> ]- | 0.74 | 1.16 | 0.05  | 2.54  | 0.75 | 0.20  | 0.00  | 1.33 | 1.15 | 1.32 |
| [OctSO <sub>3</sub> ]-              | 0.72 | 0.86 | 0.07  | 3.05  | 0.59 | 0.13  | -0.01 | 1.17 | 1.03 | 1.17 |
| [NH <sub>2</sub> SO <sub>3</sub> ]- | 1.47 | 0.75 | 0.38  | 8.87  | 0.89 | 0.55  | 0.24  | 1.55 | 1.49 | 1.59 |
| [Tau]-                              | 1.22 | 0.99 | 0.27  | 6.26  | 0.84 | 0.39  | 0.15  | 1.55 | 1.42 | 1.60 |
| [Tosy]-                             | 0.91 | 1.15 | 0.07  | 4.20  | 0.76 | 0.18  | -0.03 | 1.50 | 1.29 | 1.51 |
| [CF <sub>3</sub> SO <sub>3</sub> ]- | 1.19 | 1.92 | 0.10  | 4.61  | 1.19 | 0.31  | 0.02  | 2.14 | 1.83 | 2.17 |

**Table S3 (continued...):** COSMO-RS predicted logarithmic activity coefficients of PET in different ILs at 363.15 K

|             | [BzTPhP]+ | [TeBP]+ | [TeEP]+ | [TEMP]+ | [TMBP]+ | [TMEOH]+ | [TMEP]+ | [TBMP]+ | [THTeDP]+ | [A34DMPy]+ | [A35DMPy]+ |
|-------------|-----------|---------|---------|---------|---------|----------|---------|---------|-----------|------------|------------|
| [Ala]-      | 0.40      | 0.13    | 0.31    | 0.52    | 0.91    | 1.81     | 0.82    | 0.42    | 0.01      | 0.71       | 0.63       |
| [Arg]-      | 0.54      | 0.35    | 0.70    | 0.89    | 1.14    | 2.01     | 1.24    | 0.61    | 0.10      | 0.98       | 0.91       |
| [Aspg]-     | 0.66      | 0.41    | 0.74    | 0.94    | 1.28    | 2.17     | 1.24    | 0.70    | 0.12      | 1.10       | 1.02       |
| [Cyst]-     | 0.38      | 0.07    | 0.39    | 0.60    | 0.92    | 1.97     | 1.00    | 0.34    | -0.06     | 0.77       | 0.69       |
| [Glumn]-    | 0.57      | 0.34    | 0.68    | 0.87    | 1.17    | 2.09     | 1.22    | 0.62    | 0.10      | 0.99       | 0.92       |
| [Gly]-      | 0.43      | 0.12    | 0.16    | 0.33    | 0.79    | 1.44     | 0.45    | 0.42    | 0.00      | 0.61       | 0.52       |
| [His]-      | 0.62      | 0.38    | 0.83    | 1.05    | 1.30    | 2.35     | 1.48    | 0.66    | 0.12      | 1.14       | 1.07       |
| [Isole]-    | 0.30      | 0.10    | 0.41    | 0.62    | 0.88    | 1.84     | 1.03    | 0.36    | 0.01      | 0.69       | 0.63       |
| [Leu]-      | 0.28      | 0.09    | 0.41    | 0.62    | 0.86    | 1.84     | 1.03    | 0.34    | 0.00      | 0.68       | 0.61       |
| [Lys]-      | 0.32      | 0.12    | 0.41    | 0.61    | 0.88    | 1.79     | 0.98    | 0.38    | -0.01     | 0.69       | 0.62       |
| [Met]-      | 0.27      | 0.02    | 0.33    | 0.53    | 0.79    | 1.76     | 0.93    | 0.26    | -0.08     | 0.64       | 0.57       |
| [Phe]-      | 0.24      | 0.01    | 0.36    | 0.56    | 0.77    | 1.75     | 0.97    | 0.24    | -0.08     | 0.64       | 0.57       |
| [Pro]-      | 0.33      | 0.07    | 0.31    | 0.53    | 0.86    | 1.79     | 0.89    | 0.36    | -0.02     | 0.66       | 0.58       |
| [AspMA]-    | 0.71      | 0.50    | 0.96    | 1.19    | 1.49    | 2.60     | 1.63    | 0.80    | 0.22      | 1.27       | 1.19       |
| [GluMA]-    | 0.67      | 0.49    | 0.94    | 1.16    | 1.42    | 2.48     | 1.61    | 0.77    | 0.23      | 1.22       | 1.14       |
| [Ser]-      | 0.67      | 0.43    | 0.72    | 0.92    | 1.30    | 2.20     | 1.22    | 0.74    | 0.18      | 1.09       | 1.00       |
| [Thr]-      | 0.37      | 0.14    | 0.45    | 0.67    | 1.00    | 2.06     | 1.08    | 0.41    | 0.00      | 0.78       | 0.70       |
| [Try]-      | 0.38      | 0.19    | 0.63    | 0.81    | 0.96    | 1.90     | 1.22    | 0.41    | 0.02      | 0.85       | 0.80       |
| [Tyro]-     | 0.57      | 0.40    | 0.88    | 1.09    | 1.26    | 2.29     | 1.53    | 0.64    | 0.18      | 1.12       | 1.05       |
| [Val]-      | 0.34      | 0.12    | 0.44    | 0.66    | 0.93    | 1.97     | 1.07    | 0.38    | 0.01      | 0.74       | 0.67       |
| [2Alm]-     | 0.40      | 0.07    | 0.30    | 0.50    | 0.93    | 1.82     | 0.77    | 0.38    | -0.08     | 0.74       | 0.65       |
| [2MIm]-     | 0.33      | 0.03    | 0.38    | 0.61    | 0.94    | 2.12     | 1.06    | 0.31    | -0.06     | 0.76       | 0.67       |
| [45DCIm]-   | 0.13      | -0.05   | 0.52    | 0.76    | 0.88    | 2.38     | 1.39    | 0.15    | -0.11     | 0.73       | 0.66       |
| [56DMBeIm]- | 0.15      | -0.08   | 0.31    | 0.51    | 0.69    | 1.75     | 0.95    | 0.14    | -0.13     | 0.57       | 0.51       |
| [BeIm]-     | 0.22      | -0.05   | 0.41    | 0.65    | 0.87    | 2.16     | 1.18    | 0.19    | -0.12     | 0.73       | 0.65       |
| [Sac]-      | 0.31      | 0.04    | 0.53    | 0.75    | 0.97    | 2.19     | 1.27    | 0.28    | -0.12     | 0.83       | 0.75       |
| [2-Mbut]-   | 0.34      | 0.05    | 0.29    | 0.50    | 0.82    | 1.77     | 0.87    | 0.33    | -0.02     | 0.66       | 0.58       |

|                              |      |       |       |      |      |      |       |      |       |      |      |
|------------------------------|------|-------|-------|------|------|------|-------|------|-------|------|------|
| [2-BrMAcr]-                  | 0.30 | -0.05 | 0.34  | 0.56 | 0.79 | 1.97 | 1.03  | 0.19 | -0.11 | 0.73 | 0.65 |
| [2-BOA]-                     | 0.18 | 0.04  | 0.27  | 0.44 | 0.62 | 1.26 | 0.73  | 0.25 | 0.01  | 0.48 | 0.44 |
| [2-ClAce]-                   | 0.42 | 0.14  | 0.42  | 0.64 | 1.02 | 2.09 | 1.00  | 0.43 | 0.00  | 0.81 | 0.72 |
| [2-EBA]-                     | 0.31 | 0.09  | 0.36  | 0.57 | 0.83 | 1.75 | 0.95  | 0.36 | 0.02  | 0.66 | 0.60 |
| [2-EHA]-                     | 0.25 | 0.07  | 0.34  | 0.54 | 0.75 | 1.56 | 0.89  | 0.31 | 0.02  | 0.60 | 0.54 |
| [2-HOA]-                     | 0.13 | 0.02  | 0.22  | 0.37 | 0.52 | 1.07 | 0.62  | 0.21 | 0.00  | 0.40 | 0.36 |
| [2-(OH)MAcr]-                | 0.38 | 0.11  | 0.45  | 0.68 | 1.00 | 2.16 | 1.12  | 0.38 | -0.01 | 0.80 | 0.72 |
| [22-DMB]-                    | 0.32 | 0.11  | 0.39  | 0.61 | 0.86 | 1.81 | 0.99  | 0.37 | 0.03  | 0.69 | 0.62 |
| [3-(OH) <sub>2</sub> -MBut]- | 0.57 | 0.36  | 0.75  | 0.98 | 1.25 | 2.34 | 1.40  | 0.63 | 0.16  | 1.07 | 0.99 |
| [4-EOA]-                     | 0.20 | 0.03  | 0.29  | 0.47 | 0.68 | 1.41 | 0.80  | 0.26 | -0.01 | 0.53 | 0.47 |
| [Abt]-                       | 0.09 | -0.01 | 0.18  | 0.32 | 0.45 | 0.99 | 0.56  | 0.16 | -0.02 | 0.35 | 0.32 |
| [Ace]-                       | 0.43 | 0.10  | 0.07  | 0.23 | 0.71 | 1.26 | 0.29  | 0.40 | 0.01  | 0.55 | 0.46 |
| [AceSal]-                    | 0.28 | 0.03  | 0.40  | 0.60 | 0.83 | 1.85 | 1.04  | 0.26 | -0.08 | 0.69 | 0.62 |
| [Acryl]-                     | 0.41 | 0.08  | 0.22  | 0.41 | 0.83 | 1.68 | 0.65  | 0.37 | -0.02 | 0.67 | 0.58 |
| [Benzoate]-                  | 0.32 | 0.02  | 0.35  | 0.56 | 0.84 | 1.90 | 0.98  | 0.28 | -0.06 | 0.70 | 0.63 |
| [But]-                       | 0.37 | 0.10  | 0.30  | 0.51 | 0.85 | 1.76 | 0.84  | 0.39 | 0.01  | 0.67 | 0.59 |
| [C3C]-                       | 0.33 | 0.05  | 0.41  | 0.61 | 0.85 | 1.83 | 1.02  | 0.29 | -0.09 | 0.72 | 0.65 |
| [Crotonate]-                 | 0.36 | 0.05  | 0.21  | 0.41 | 0.79 | 1.66 | 0.71  | 0.33 | -0.03 | 0.62 | 0.54 |
| [Dec]-                       | 0.19 | 0.03  | 0.29  | 0.47 | 0.67 | 1.37 | 0.79  | 0.26 | -0.01 | 0.51 | 0.46 |
| [For]-                       | 0.47 | 0.11  | -0.08 | 0.03 | 0.61 | 0.76 | -0.19 | 0.42 | 0.01  | 0.46 | 0.37 |
| [Gen]-                       | 1.00 | 0.79  | 1.35  | 1.57 | 1.83 | 2.89 | 2.00  | 1.10 | 0.40  | 1.66 | 1.58 |
| [Glyco]-                     | 0.70 | 0.42  | 0.34  | 0.46 | 0.95 | 1.21 | 0.36  | 0.73 | 0.21  | 0.80 | 0.73 |
| [Hex]-                       | 0.30 | 0.07  | 0.34  | 0.55 | 0.82 | 1.70 | 0.92  | 0.34 | 0.01  | 0.64 | 0.57 |
| [Im2C]-                      | 0.48 | 0.15  | 0.36  | 0.54 | 0.91 | 1.74 | 0.79  | 0.43 | -0.01 | 0.79 | 0.70 |
| [I3A]-                       | 0.43 | 0.22  | 0.63  | 0.83 | 1.01 | 2.00 | 1.24  | 0.45 | 0.05  | 0.90 | 0.84 |
| [Lac]-                       | 0.63 | 0.37  | 0.44  | 0.61 | 1.02 | 1.62 | 0.73  | 0.67 | 0.18  | 0.86 | 0.78 |
| [MCb]-                       | 0.42 | 0.10  | 0.23  | 0.43 | 0.88 | 1.72 | 0.66  | 0.40 | -0.02 | 0.68 | 0.59 |
| [N-MCb]-                     | 0.41 | 0.09  | 0.10  | 0.27 | 0.73 | 1.35 | 0.39  | 0.39 | -0.01 | 0.56 | 0.48 |
| [NMeO]-                      | 0.38 | 0.06  | 0.23  | 0.43 | 0.82 | 1.72 | 0.72  | 0.34 | -0.05 | 0.65 | 0.57 |

|                           |       |       |      |      |      |      |      |       |       |      |      |
|---------------------------|-------|-------|------|------|------|------|------|-------|-------|------|------|
| [Oct]-                    | 0.24  | 0.05  | 0.32 | 0.52 | 0.75 | 1.54 | 0.87 | 0.30  | 0.00  | 0.58 | 0.52 |
| [Oxa]-                    | 0.59  | 0.28  | 0.46 | 0.64 | 1.08 | 1.80 | 0.78 | 0.58  | 0.06  | 0.92 | 0.83 |
| [Prop]-                   | 0.40  | 0.11  | 0.24 | 0.44 | 0.84 | 1.67 | 0.70 | 0.41  | 0.02  | 0.66 | 0.58 |
| [Sal]-                    | 0.70  | 0.43  | 0.82 | 1.03 | 1.33 | 2.30 | 1.41 | 0.72  | 0.18  | 1.17 | 1.09 |
| [ThioSal]-                | 0.30  | -0.01 | 0.38 | 0.59 | 0.82 | 1.91 | 1.03 | 0.23  | -0.11 | 0.73 | 0.65 |
| [TFA]-                    | 0.32  | 0.13  | 0.65 | 0.93 | 1.18 | 2.78 | 1.56 | 0.39  | 0.00  | 0.93 | 0.84 |
| [TSAC]-                   | -0.08 | 0.02  | 0.39 | 0.51 | 0.52 | 1.40 | 0.86 | 0.09  | -0.01 | 0.37 | 0.34 |
| [B(F <sub>3</sub> )SI]-   | -0.12 | -0.05 | 0.18 | 0.25 | 0.23 | 0.82 | 0.43 | -0.01 | -0.03 | 0.19 | 0.17 |
| [MSA]-                    | 0.37  | 0.13  | 0.59 | 0.82 | 1.11 | 2.32 | 1.31 | 0.39  | -0.07 | 0.89 | 0.81 |
| [TFMI]                    | -0.06 | 0.03  | 0.42 | 0.55 | 0.55 | 1.40 | 0.90 | 0.11  | -0.01 | 0.41 | 0.38 |
| [DCN]-                    | 0.27  | -0.12 | 0.45 | 0.73 | 1.05 | 2.74 | 1.39 | 0.16  | -0.21 | 0.89 | 0.79 |
| [SbF <sub>6</sub> ]-      | -0.01 | 0.03  | 0.74 | 1.01 | 1.04 | 2.79 | 1.79 | 0.18  | -0.05 | 0.75 | 0.69 |
| [PF <sub>6</sub> ]-       | 0.11  | 0.07  | 0.91 | 1.24 | 1.36 | 3.52 | 2.21 | 0.28  | -0.07 | 1.02 | 0.93 |
| [NO <sub>3</sub> ]-       | 0.51  | 0.17  | 0.40 | 0.60 | 1.14 | 1.99 | 0.77 | 0.49  | -0.01 | 0.89 | 0.78 |
| [WOF <sub>5</sub> ]-      | 0.08  | 0.07  | 0.84 | 1.13 | 1.19 | 3.10 | 1.99 | 0.25  | -0.04 | 0.90 | 0.82 |
| [Phenolate]-              | 0.32  | 0.06  | 0.43 | 0.66 | 0.94 | 2.14 | 1.13 | 0.31  | -0.03 | 0.76 | 0.68 |
| [BF <sub>4</sub> ]-       | 0.39  | 0.16  | 0.86 | 1.18 | 1.57 | 3.42 | 1.91 | 0.47  | -0.05 | 1.19 | 1.07 |
| [SCN]-                    | 0.34  | -0.07 | 0.45 | 0.71 | 1.13 | 2.57 | 1.21 | 0.23  | -0.21 | 0.94 | 0.82 |
| [PhS]-                    | 0.24  | -0.07 | 0.37 | 0.60 | 0.86 | 2.13 | 1.12 | 0.19  | -0.16 | 0.72 | 0.64 |
| [TFMSM]-                  | -0.10 | 0.06  | 0.33 | 0.41 | 0.39 | 0.93 | 0.63 | 0.10  | 0.03  | 0.28 | 0.26 |
| [TCN]-                    | 0.05  | -0.26 | 0.33 | 0.58 | 0.71 | 2.34 | 1.26 | -0.07 | -0.28 | 0.66 | 0.58 |
| [DBPO <sub>4</sub> ]-     | 0.15  | 0.01  | 0.28 | 0.46 | 0.65 | 1.43 | 0.80 | 0.21  | -0.05 | 0.48 | 0.43 |
| [DEPO <sub>4</sub> ]-     | 0.28  | 0.05  | 0.35 | 0.56 | 0.84 | 1.83 | 0.98 | 0.30  | -0.04 | 0.64 | 0.57 |
| [DIsoPrPO <sub>4</sub> ]- | 0.22  | 0.04  | 0.35 | 0.55 | 0.77 | 1.69 | 0.95 | 0.27  | -0.03 | 0.59 | 0.53 |
| [DMPO <sub>4</sub> ]-     | 0.36  | 0.09  | 0.35 | 0.57 | 0.92 | 1.95 | 0.96 | 0.37  | -0.03 | 0.71 | 0.63 |
| [22-(ME)OHES]-            | 0.22  | 0.08  | 0.47 | 0.66 | 0.85 | 1.87 | 1.09 | 0.28  | -0.06 | 0.66 | 0.60 |
| [BzS]-                    | 0.32  | 0.04  | 0.45 | 0.67 | 0.94 | 2.11 | 1.15 | 0.29  | -0.10 | 0.77 | 0.70 |
| [EtSO <sub>4</sub> ]-     | 0.34  | 0.10  | 0.51 | 0.75 | 1.07 | 2.34 | 1.26 | 0.36  | -0.05 | 0.83 | 0.74 |

|                                     |      |      |      |      |      |      |      |      |       |      |      |
|-------------------------------------|------|------|------|------|------|------|------|------|-------|------|------|
| [HSO <sub>3</sub> ]-                | 0.21 | 0.03 | 0.35 | 0.55 | 0.79 | 1.76 | 0.97 | 0.26 | -0.06 | 0.59 | 0.53 |
| [HSO <sub>4</sub> ]-                | 0.76 | 0.47 | 1.00 | 1.26 | 1.72 | 2.87 | 1.64 | 0.83 | 0.12  | 1.43 | 1.32 |
| [MetA]-                             | 0.54 | 0.27 | 0.83 | 1.06 | 1.32 | 2.52 | 1.56 | 0.56 | -0.02 | 1.14 | 1.06 |
| [MeSO <sub>4</sub> ]-               | 0.41 | 0.14 | 0.53 | 0.77 | 1.15 | 2.41 | 1.23 | 0.42 | -0.04 | 0.90 | 0.81 |
| [MeSO <sub>3</sub> ]-               | 0.43 | 0.12 | 0.24 | 0.43 | 0.91 | 1.72 | 0.65 | 0.42 | -0.04 | 0.69 | 0.60 |
| [F <sub>9</sub> BSO <sub>3</sub> ]- | 0.06 | 0.08 | 0.51 | 0.67 | 0.74 | 1.73 | 1.08 | 0.22 | 0.00  | 0.56 | 0.52 |
| [OctSO <sub>3</sub> ]-              | 0.15 | 0.00 | 0.30 | 0.48 | 0.69 | 1.54 | 0.86 | 0.21 | -0.06 | 0.50 | 0.45 |
| [NH <sub>2</sub> SO <sub>3</sub> ]- | 0.65 | 0.33 | 0.52 | 0.69 | 1.21 | 1.78 | 0.74 | 0.67 | 0.04  | 0.99 | 0.89 |
| [Tau]-                              | 0.48 | 0.21 | 0.46 | 0.65 | 1.06 | 1.96 | 0.95 | 0.50 | -0.01 | 0.83 | 0.75 |
| [Tosy]-                             | 0.26 | 0.01 | 0.38 | 0.59 | 0.83 | 1.92 | 1.04 | 0.24 | -0.11 | 0.67 | 0.60 |
| [CF <sub>3</sub> SO <sub>3</sub> ]- | 0.23 | 0.11 | 0.73 | 1.01 | 1.18 | 2.86 | 1.71 | 0.34 | -0.02 | 0.93 | 0.85 |

**Table S3 (continued...):** COSMO-RS predicted logarithmic activity coefficients of PET in different ILs at 363.15 K

|          | [B-3-MPy]+ | [B-4-MPy]+ | [BPy]+ | [EPy]+ | [HPy]+ | [OPy]+ | [DMPyrr]+ | [DprPyrr]+ | [12MeoEMPyrr]+ |
|----------|------------|------------|--------|--------|--------|--------|-----------|------------|----------------|
| [Ala]-   | 0.88       | 0.97       | 1.26   | 1.34   | 1.14   | 0.91   | 0.69      | 0.36       | 0.98           |
| [Arg]-   | 1.08       | 1.15       | 1.40   | 1.60   | 1.24   | 1.01   | 1.25      | 0.71       | 1.26           |
| [Aspg]-  | 1.22       | 1.31       | 1.61   | 1.76   | 1.43   | 1.17   | 1.14      | 0.78       | 1.36           |
| [Cyst]-  | 0.88       | 0.96       | 1.27   | 1.52   | 1.08   | 0.82   | 0.99      | 0.41       | 1.07           |
| [Glumn]- | 1.11       | 1.19       | 1.46   | 1.66   | 1.30   | 1.05   | 1.19      | 0.70       | 1.28           |
| [Gly]-   | 0.83       | 0.94       | 1.21   | 1.08   | 1.17   | 0.94   | 0.14      | 0.25       | 0.78           |
| [His]-   | 1.22       | 1.28       | 1.57   | 1.90   | 1.34   | 1.08   | 1.52      | 0.82       | 1.46           |
| [Isole]- | 0.80       | 0.87       | 1.11   | 1.34   | 0.96   | 0.74   | 1.06      | 0.41       | 1.02           |
| [Leu]-   | 0.78       | 0.85       | 1.08   | 1.33   | 0.92   | 0.71   | 1.08      | 0.41       | 1.02           |
| [Lys]-   | 0.81       | 0.88       | 1.13   | 1.32   | 0.99   | 0.78   | 1.00      | 0.42       | 1.01           |
| [Met]-   | 0.74       | 0.81       | 1.07   | 1.32   | 0.91   | 0.69   | 0.97      | 0.33       | 0.94           |
| [Phe]-   | 0.71       | 0.77       | 1.01   | 1.30   | 0.83   | 0.62   | 1.04      | 0.35       | 0.95           |
| [Pro]-   | 0.81       | 0.89       | 1.16   | 1.31   | 1.04   | 0.82   | 0.84      | 0.34       | 0.96           |

|                              |      |      |      |      |      |      |       |      |      |
|------------------------------|------|------|------|------|------|------|-------|------|------|
| [AspMA]-                     | 1.37 | 1.45 | 1.77 | 2.08 | 1.52 | 1.24 | 1.65  | 0.97 | 1.64 |
| [GluMA]-                     | 1.30 | 1.37 | 1.66 | 1.98 | 1.44 | 1.17 | 1.66  | 0.94 | 1.58 |
| [Ser]-                       | 1.24 | 1.33 | 1.64 | 1.74 | 1.48 | 1.21 | 1.08  | 0.77 | 1.37 |
| [Thr]-                       | 0.90 | 0.98 | 1.28 | 1.51 | 1.11 | 0.86 | 1.07  | 0.48 | 1.14 |
| [Try]-                       | 0.88 | 0.93 | 1.15 | 1.49 | 0.94 | 0.73 | 1.31  | 0.59 | 1.15 |
| [Tyro]-                      | 1.16 | 1.21 | 1.46 | 1.83 | 1.23 | 0.99 | 1.63  | 0.85 | 1.45 |
| [Val]-                       | 0.85 | 0.92 | 1.18 | 1.43 | 1.02 | 0.78 | 1.10  | 0.44 | 1.09 |
| [2Alm]-                      | 0.91 | 1.01 | 1.34 | 1.41 | 1.19 | 0.93 | 0.59  | 0.36 | 1.01 |
| [2MIm]-                      | 0.87 | 0.95 | 1.27 | 1.56 | 1.05 | 0.79 | 1.07  | 0.39 | 1.13 |
| [45DCIm]-                    | 0.70 | 0.73 | 1.03 | 1.66 | 0.69 | 0.44 | 1.67  | 0.47 | 1.27 |
| [56DMBeIm]-                  | 0.62 | 0.67 | 0.92 | 1.26 | 0.71 | 0.51 | 1.07  | 0.28 | 0.91 |
| [BeIm]-                      | 0.77 | 0.82 | 1.13 | 1.58 | 0.86 | 0.61 | 1.33  | 0.39 | 1.14 |
| [Sac]-                       | 0.85 | 0.90 | 1.23 | 1.67 | 0.95 | 0.69 | 1.39  | 0.52 | 1.21 |
| [2-Mbut]-                    | 0.79 | 0.87 | 1.13 | 1.31 | 0.99 | 0.77 | 0.82  | 0.31 | 0.93 |
| [2-BrMAcr]-                  | 0.77 | 0.84 | 1.14 | 1.55 | 0.89 | 0.63 | 1.10  | 0.31 | 1.00 |
| [2-BOA]-                     | 0.59 | 0.64 | 0.79 | 0.92 | 0.71 | 0.55 | 0.73  | 0.26 | 0.70 |
| [2-ClAce]-                   | 0.94 | 1.03 | 1.36 | 1.55 | 1.17 | 0.90 | 0.89  | 0.47 | 1.15 |
| [2-EBA]-                     | 0.78 | 0.86 | 1.08 | 1.27 | 0.95 | 0.74 | 0.95  | 0.37 | 0.96 |
| [2-EHA]-                     | 0.70 | 0.77 | 0.96 | 1.13 | 0.84 | 0.66 | 0.90  | 0.34 | 0.87 |
| [2-HOA]-                     | 0.50 | 0.55 | 0.68 | 0.78 | 0.61 | 0.47 | 0.62  | 0.21 | 0.59 |
| [2-(OH)MAcr]-                | 0.91 | 0.98 | 1.31 | 1.60 | 1.09 | 0.83 | 1.12  | 0.47 | 1.18 |
| [22-DMB]-                    | 0.81 | 0.88 | 1.10 | 1.30 | 0.96 | 0.75 | 1.00  | 0.40 | 1.00 |
| [3-(OH) <sub>2</sub> -MBut]- | 1.16 | 1.23 | 1.52 | 1.82 | 1.30 | 1.04 | 1.43  | 0.76 | 1.41 |
| [4-EOA]-                     | 0.64 | 0.69 | 0.88 | 1.03 | 0.78 | 0.60 | 0.81  | 0.28 | 0.78 |
| [Abt]-                       | 0.43 | 0.48 | 0.59 | 0.70 | 0.52 | 0.39 | 0.56  | 0.16 | 0.53 |
| [Ace]-                       | 0.78 | 0.90 | 1.14 | 0.93 | 1.13 | 0.92 | -0.10 | 0.16 | 0.65 |
| [AceSal]-                    | 0.74 | 0.80 | 1.07 | 1.39 | 0.87 | 0.65 | 1.11  | 0.39 | 1.01 |
| [Acryl]-                     | 0.84 | 0.94 | 1.23 | 1.27 | 1.12 | 0.88 | 0.44  | 0.28 | 0.88 |
| [Benzoate]-                  | 0.79 | 0.86 | 1.14 | 1.43 | 0.95 | 0.71 | 1.01  | 0.35 | 1.00 |



|                        |      |      |      |      |      |      |       |      |      |
|------------------------|------|------|------|------|------|------|-------|------|------|
| [But]-                 | 0.83 | 0.92 | 1.17 | 1.28 | 1.06 | 0.84 | 0.76  | 0.33 | 0.94 |
| [C3C]-                 | 0.78 | 0.84 | 1.12 | 1.42 | 0.92 | 0.69 | 1.07  | 0.41 | 1.01 |
| [Crotonate]-           | 0.78 | 0.87 | 1.15 | 1.23 | 1.04 | 0.82 | 0.58  | 0.26 | 0.85 |
| [Dec]-                 | 0.62 | 0.68 | 0.86 | 1.00 | 0.76 | 0.59 | 0.80  | 0.28 | 0.76 |
| [For]-                 | 0.75 | 0.88 | 1.11 | 0.59 | 1.18 | 0.97 | -0.85 | 0.07 | 0.43 |
| [Gen]-                 | 1.73 | 1.80 | 2.12 | 2.47 | 1.84 | 1.53 | 2.02  | 1.34 | 1.97 |
| [Glyco]-               | 1.06 | 1.18 | 1.39 | 1.02 | 1.43 | 1.22 | -0.13 | 0.45 | 0.80 |
| [Hex]-                 | 0.77 | 0.84 | 1.07 | 1.24 | 0.95 | 0.75 | 0.91  | 0.35 | 0.93 |
| [Im2C]-                | 0.93 | 1.02 | 1.32 | 1.41 | 1.18 | 0.94 | 0.63  | 0.40 | 0.97 |
| [I3A]-                 | 0.95 | 1.00 | 1.24 | 1.58 | 1.03 | 0.80 | 1.32  | 0.61 | 1.19 |
| [Lac]-                 | 1.06 | 1.17 | 1.41 | 1.29 | 1.36 | 1.14 | 0.44  | 0.52 | 0.99 |
| [MCb]-                 | 0.87 | 0.97 | 1.29 | 1.29 | 1.18 | 0.93 | 0.42  | 0.31 | 0.91 |
| [N-MCb]-               | 0.78 | 0.89 | 1.15 | 1.01 | 1.12 | 0.91 | 0.08  | 0.19 | 0.70 |
| [NMeO]-                | 0.80 | 0.90 | 1.20 | 1.30 | 1.08 | 0.84 | 0.58  | 0.29 | 0.89 |
| [Oct]-                 | 0.70 | 0.76 | 0.96 | 1.13 | 0.85 | 0.67 | 0.88  | 0.32 | 0.85 |
| [Oxa]-                 | 1.09 | 1.19 | 1.51 | 1.48 | 1.38 | 1.10 | 0.48  | 0.54 | 1.09 |
| [Prop]-                | 0.84 | 0.94 | 1.20 | 1.22 | 1.11 | 0.88 | 0.51  | 0.30 | 0.88 |
| [Sal]-                 | 1.27 | 1.35 | 1.65 | 1.90 | 1.44 | 1.18 | 1.38  | 0.83 | 1.44 |
| [ThioSal]-             | 0.78 | 0.84 | 1.13 | 1.49 | 0.90 | 0.66 | 1.10  | 0.36 | 1.01 |
| [TFA]-                 | 0.96 | 1.03 | 1.38 | 1.94 | 1.04 | 0.75 | 1.73  | 0.65 | 1.51 |
| [TSAC]-                | 0.33 | 0.33 | 0.47 | 0.84 | 0.26 | 0.13 | 1.05  | 0.36 | 0.82 |
| [B(F <sub>5</sub> SI)- | 0.16 | 0.16 | 0.22 | 0.44 | 0.08 | 0.00 | 0.53  | 0.14 | 0.41 |
| [MSA]-                 | 0.95 | 1.01 | 1.36 | 1.75 | 1.10 | 0.83 | 1.40  | 0.61 | 1.32 |
| [TFMI]                 | 0.36 | 0.36 | 0.51 | 0.89 | 0.29 | 0.16 | 1.09  | 0.39 | 0.84 |
| [DCN]-                 | 0.92 | 0.99 | 1.44 | 2.09 | 1.04 | 0.70 | 1.52  | 0.44 | 1.37 |
| [SbF <sub>6</sub> ]-   | 0.65 | 0.65 | 0.96 | 1.78 | 0.53 | 0.29 | 2.23  | 0.69 | 1.58 |
| [PF <sub>6</sub> ]-    | 0.91 | 0.93 | 1.35 | 2.39 | 0.82 | 0.49 | 2.70  | 0.87 | 1.95 |
| [NO <sub>3</sub> ]-    | 1.06 | 1.17 | 1.58 | 1.58 | 1.37 | 1.05 | 0.38  | 0.52 | 1.17 |
| [WOF <sub>5</sub> ]-   | 0.80 | 0.81 | 1.16 | 2.06 | 0.69 | 0.42 | 2.45  | 0.79 | 1.75 |

|                                     |      |      |      |      |      |      |      |      |      |
|-------------------------------------|------|------|------|------|------|------|------|------|------|
| [Phenolate]-                        | 0.84 | 0.91 | 1.21 | 1.56 | 0.98 | 0.73 | 1.20 | 0.43 | 1.15 |
| [BF <sub>4</sub> ]-                 | 1.21 | 1.28 | 1.80 | 2.53 | 1.31 | 0.91 | 1.98 | 0.89 | 1.92 |
| [SCN]-                              | 1.01 | 1.09 | 1.59 | 2.05 | 1.20 | 0.84 | 1.15 | 0.48 | 1.37 |
| [PhS]-                              | 0.78 | 0.84 | 1.17 | 1.59 | 0.91 | 0.66 | 1.23 | 0.37 | 1.10 |
| [TFMSM]-                            | 0.24 | 0.23 | 0.32 | 0.57 | 0.16 | 0.08 | 0.76 | 0.32 | 0.60 |
| [TCN]-                              | 0.60 | 0.63 | 0.99 | 1.73 | 0.60 | 0.33 | 1.53 | 0.27 | 1.12 |
| [DBPO <sub>4</sub> ]-               | 0.57 | 0.62 | 0.82 | 1.01 | 0.69 | 0.52 | 0.85 | 0.28 | 0.77 |
| [DEPO <sub>4</sub> ]-               | 0.75 | 0.82 | 1.09 | 1.32 | 0.93 | 0.71 | 1.01 | 0.37 | 0.99 |
| [DIsoPrPO <sub>4</sub> ]-           | 0.68 | 0.74 | 0.97 | 1.21 | 0.82 | 0.63 | 1.00 | 0.35 | 0.92 |
| [DMPO <sub>4</sub> ]-               | 0.84 | 0.92 | 1.23 | 1.44 | 1.07 | 0.83 | 0.92 | 0.39 | 1.05 |
| [22-(ME)OHES]-                      | 0.70 | 0.75 | 1.01 | 1.33 | 0.81 | 0.60 | 1.21 | 0.47 | 1.06 |
| [BzS]-                              | 0.83 | 0.89 | 1.22 | 1.59 | 0.97 | 0.72 | 1.23 | 0.46 | 1.14 |
| [EtSO <sub>4</sub> ]-               | 0.90 | 0.97 | 1.33 | 1.71 | 1.08 | 0.81 | 1.32 | 0.54 | 1.28 |
| [HSO <sub>3</sub> ]-                | 0.68 | 0.74 | 1.00 | 1.25 | 0.85 | 0.64 | 1.03 | 0.36 | 0.95 |
| [HSO <sub>4</sub> ]-                | 1.55 | 1.65 | 2.12 | 2.39 | 1.78 | 1.40 | 1.43 | 1.07 | 1.84 |
| [MetA]-                             | 1.19 | 1.25 | 1.60 | 2.02 | 1.31 | 1.01 | 1.64 | 0.82 | 1.53 |
| [MeSO <sub>4</sub> ]-               | 1.00 | 1.08 | 1.47 | 1.80 | 1.21 | 0.91 | 1.21 | 0.58 | 1.34 |
| [MeSO <sub>3</sub> ]-               | 0.88 | 0.98 | 1.32 | 1.30 | 1.21 | 0.96 | 0.40 | 0.34 | 0.93 |
| [F <sub>9</sub> BSO <sub>3</sub> ]- | 0.56 | 0.58 | 0.77 | 1.15 | 0.54 | 0.36 | 1.24 | 0.48 | 1.00 |
| [OctSO <sub>3</sub> ]-              | 0.59 | 0.64 | 0.86 | 1.08 | 0.72 | 0.55 | 0.91 | 0.30 | 0.83 |
| [NH <sub>2</sub> SO <sub>3</sub> ]- | 1.19 | 1.31 | 1.66 | 1.49 | 1.54 | 1.24 | 0.34 | 0.64 | 1.16 |
| [Tau]-                              | 0.99 | 1.08 | 1.41 | 1.50 | 1.26 | 1.01 | 0.83 | 0.52 | 1.13 |
| [Tosy]-                             | 0.73 | 0.79 | 1.08 | 1.42 | 0.87 | 0.64 | 1.12 | 0.38 | 1.02 |
| [CF <sub>3</sub> SO <sub>3</sub> ]- | 0.91 | 0.95 | 1.31 | 1.99 | 0.93 | 0.64 | 1.99 | 0.71 | 1.58 |

**Table S3 (continued...):** COSMO-RS predicted logarithmic activity coefficients of PET in different ILs at 363.15 K

|             | [BEPyrr]+ | [EMPyrr]+ | [HMPyrr]+ | [M12MThEPyrr]+ | [tBTMGH]+ | [ETBDH]+ | [ITBDH]+ | [MTBDH]+ |
|-------------|-----------|-----------|-----------|----------------|-----------|----------|----------|----------|
| [Ala]-      | 0.39      | 0.55      | 0.65      | 1.08           | 0.05      | 0.01     | -0.08    | 0.05     |
| [Arg]-      | 0.74      | 1.04      | 0.87      | 1.28           | 0.49      | 0.50     | 0.42     | 0.57     |
| [Aspg]-     | 0.81      | 0.99      | 1.00      | 1.44           | 0.52      | 0.51     | 0.43     | 0.55     |
| [Cyst]-     | 0.44      | 0.75      | 0.62      | 1.13           | 0.15      | 0.14     | 0.04     | 0.20     |
| [Glumn]-    | 0.72      | 0.99      | 0.89      | 1.34           | 0.45      | 0.45     | 0.37     | 0.51     |
| [Gly]-      | 0.28      | 0.17      | 0.62      | 0.92           | -0.08     | -0.17    | -0.24    | -0.19    |
| [His]-      | 0.85      | 1.25      | 0.96      | 1.50           | 0.60      | 0.62     | 0.53     | 0.71     |
| [Isole]-    | 0.44      | 0.81      | 0.58      | 1.04           | 0.16      | 0.17     | 0.08     | 0.26     |
| [Leu]-      | 0.43      | 0.82      | 0.57      | 1.03           | 0.17      | 0.18     | 0.09     | 0.27     |
| [Lys]-      | 0.45      | 0.77      | 0.61      | 1.04           | 0.17      | 0.17     | 0.09     | 0.24     |
| [Met]-      | 0.36      | 0.72      | 0.50      | 0.98           | 0.09      | 0.10     | 0.01     | 0.18     |
| [Phe]-      | 0.37      | 0.78      | 0.48      | 0.97           | 0.14      | 0.17     | 0.07     | 0.26     |
| [Pro]-      | 0.37      | 0.64      | 0.59      | 1.03           | 0.03      | 0.01     | -0.08    | 0.08     |
| [AspMA]-    | 1.00      | 1.39      | 1.13      | 1.70           | 0.71      | 0.74     | 0.63     | 0.83     |
| [GluMA]-    | 0.96      | 1.38      | 1.08      | 1.61           | 0.70      | 0.73     | 0.63     | 0.83     |
| [Ser]-      | 0.79      | 0.95      | 1.02      | 1.47           | 0.48      | 0.45     | 0.37     | 0.49     |
| [Thr]-      | 0.51      | 0.83      | 0.70      | 1.21           | 0.19      | 0.18     | 0.10     | 0.25     |
| [Try]-      | 0.62      | 1.05      | 0.66      | 1.15           | 0.44      | 0.48     | 0.39     | 0.59     |
| [Tyro]-     | 0.88      | 1.35      | 0.93      | 1.45           | 0.67      | 0.72     | 0.62     | 0.84     |
| [Val]-      | 0.47      | 0.84      | 0.63      | 1.12           | 0.18      | 0.18     | 0.09     | 0.27     |
| [2Alm]-     | 0.40      | 0.50      | 0.67      | 1.14           | 0.06      | 0.00     | -0.07    | 0.03     |
| [2MIm]-     | 0.43      | 0.80      | 0.61      | 1.21           | 0.11      | 0.10     | 0.00     | 0.18     |
| [45DCIm]-   | 0.50      | 1.21      | 0.48      | 1.28           | 0.28      | 0.35     | 0.25     | 0.50     |
| [56DMBeIm]- | 0.31      | 0.77      | 0.39      | 0.93           | 0.10      | 0.13     | 0.04     | 0.23     |
| [BeIm]-     | 0.43      | 0.96      | 0.51      | 1.18           | 0.17      | 0.21     | 0.11     | 0.33     |
| [Sac]-      | 0.55      | 1.05      | 0.62      | 1.28           | 0.30      | 0.34     | 0.24     | 0.46     |
| [2-Mbut]-   | 0.34      | 0.61      | 0.54      | 1.00           | 0.03      | 0.01     | -0.08    | 0.08     |

|                              |      |       |      |      |       |       |       |       |
|------------------------------|------|-------|------|------|-------|-------|-------|-------|
| [2-BrMAcr]-                  | 0.34 | 0.79  | 0.45 | 1.05 | 0.10  | 0.13  | 0.01  | 0.23  |
| [2-BOA]-                     | 0.28 | 0.57  | 0.39 | 0.68 | 0.06  | 0.08  | 0.00  | 0.15  |
| [2-ClAce]-                   | 0.50 | 0.72  | 0.72 | 1.28 | 0.16  | 0.14  | 0.05  | 0.19  |
| [2-EBA]-                     | 0.39 | 0.72  | 0.55 | 0.98 | 0.10  | 0.10  | 0.00  | 0.18  |
| [2-EHA]-                     | 0.35 | 0.70  | 0.49 | 0.87 | 0.10  | 0.11  | 0.02  | 0.20  |
| [2-HOA]-                     | 0.22 | 0.48  | 0.32 | 0.56 | 0.04  | 0.06  | -0.02 | 0.12  |
| [2-(OH)MAcr]-                | 0.50 | 0.86  | 0.68 | 1.26 | 0.19  | 0.20  | 0.10  | 0.27  |
| [22-DMB]-                    | 0.42 | 0.77  | 0.58 | 1.02 | 0.13  | 0.13  | 0.04  | 0.22  |
| [3-(OH) <sub>2</sub> -MBut]- | 0.78 | 1.17  | 0.92 | 1.46 | 0.52  | 0.53  | 0.43  | 0.62  |
| [4-EOA]-                     | 0.30 | 0.62  | 0.43 | 0.77 | 0.06  | 0.07  | -0.02 | 0.15  |
| [Abt]-                       | 0.18 | 0.43  | 0.26 | 0.49 | 0.03  | 0.05  | -0.02 | 0.11  |
| [Ace]-                       | 0.19 | -0.01 | 0.56 | 0.81 | -0.17 | -0.28 | -0.34 | -0.30 |
| [AceSal]-                    | 0.42 | 0.83  | 0.52 | 1.07 | 0.18  | 0.22  | 0.12  | 0.31  |
| [Acryl]-                     | 0.31 | 0.37  | 0.59 | 1.02 | -0.03 | -0.09 | -0.17 | -0.07 |
| [Benzoate]-                  | 0.38 | 0.74  | 0.53 | 1.08 | 0.11  | 0.12  | 0.01  | 0.20  |
| [But]-                       | 0.36 | 0.58  | 0.59 | 1.01 | 0.03  | -0.01 | -0.10 | 0.05  |
| [C3C]-                       | 0.43 | 0.81  | 0.55 | 1.08 | 0.20  | 0.23  | 0.13  | 0.32  |
| [Crotonate]-                 | 0.28 | 0.44  | 0.54 | 0.96 | -0.05 | -0.09 | -0.18 | -0.05 |
| [Dec]-                       | 0.30 | 0.61  | 0.42 | 0.75 | 0.06  | 0.07  | -0.01 | 0.15  |
| [For]-                       | 0.10 | -0.48 | 0.55 | 0.66 | -0.27 | -0.43 | -0.47 | -0.53 |
| [Gen]-                       | 1.36 | 1.77  | 1.46 | 2.02 | 1.12  | 1.17  | 1.05  | 1.27  |
| [Glyco]-                     | 0.47 | 0.09  | 0.86 | 0.97 | 0.16  | 0.05  | 0.00  | -0.01 |
| [Hex]-                       | 0.37 | 0.70  | 0.54 | 0.96 | 0.07  | 0.07  | -0.03 | 0.15  |
| [Im2C]-                      | 0.43 | 0.53  | 0.67 | 1.09 | 0.14  | 0.10  | 0.02  | 0.13  |
| [I3A]-                       | 0.63 | 1.05  | 0.70 | 1.21 | 0.43  | 0.47  | 0.37  | 0.57  |
| [Lac]-                       | 0.54 | 0.46  | 0.84 | 1.11 | 0.22  | 0.16  | 0.08  | 0.15  |
| [MCb]-                       | 0.34 | 0.36  | 0.65 | 1.07 | -0.02 | -0.08 | -0.16 | -0.07 |
| [N-MCb]-                     | 0.22 | 0.10  | 0.56 | 0.85 | -0.14 | -0.23 | -0.30 | -0.24 |
| [NMeO]-                      | 0.32 | 0.45  | 0.58 | 1.02 | -0.01 | -0.05 | -0.14 | -0.02 |

|                           |      |      |      |      |       |       |       |       |
|---------------------------|------|------|------|------|-------|-------|-------|-------|
| [Oct]-                    | 0.34 | 0.67 | 0.48 | 0.85 | 0.07  | 0.08  | -0.01 | 0.16  |
| [Oxa]-                    | 0.57 | 0.50 | 0.85 | 1.24 | 0.25  | 0.19  | 0.11  | 0.18  |
| [Prop]-                   | 0.32 | 0.42 | 0.60 | 0.99 | -0.02 | -0.08 | -0.17 | -0.05 |
| [Sal]-                    | 0.86 | 1.17 | 1.01 | 1.51 | 0.59  | 0.61  | 0.50  | 0.68  |
| [ThioSal]-                | 0.39 | 0.81 | 0.50 | 1.07 | 0.16  | 0.18  | 0.07  | 0.27  |
| [TFA]-                    | 0.68 | 1.31 | 0.76 | 1.59 | 0.38  | 0.43  | 0.32  | 0.56  |
| [TSAC]-                   | 0.37 | 0.81 | 0.30 | 0.79 | 0.25  | 0.32  | 0.27  | 0.42  |
| [B(F <sub>5</sub> )SI]-   | 0.14 | 0.40 | 0.09 | 0.38 | 0.12  | 0.16  | 0.13  | 0.22  |
| [MSA]-                    | 0.64 | 1.09 | 0.76 | 1.41 | 0.34  | 0.37  | 0.27  | 0.47  |
| [TFMI]                    | 0.40 | 0.85 | 0.34 | 0.82 | 0.29  | 0.35  | 0.31  | 0.46  |
| [DCN]-                    | 0.48 | 1.09 | 0.58 | 1.48 | 0.16  | 0.18  | 0.06  | 0.30  |
| [SbF <sub>6</sub> ]-      | 0.71 | 1.66 | 0.59 | 1.57 | 0.46  | 0.56  | 0.48  | 0.76  |
| [PF <sub>6</sub> ]-       | 0.90 | 1.99 | 0.80 | 1.97 | 0.58  | 0.68  | 0.58  | 0.89  |
| [NO <sub>3</sub> ]-       | 0.55 | 0.46 | 0.86 | 1.39 | 0.16  | 0.09  | 0.02  | 0.07  |
| [WOF <sub>5</sub> ]-      | 0.81 | 1.81 | 0.70 | 1.74 | 0.54  | 0.65  | 0.55  | 0.85  |
| [Phenolate]-              | 0.46 | 0.90 | 0.60 | 1.21 | 0.18  | 0.19  | 0.09  | 0.29  |
| [BF <sub>4</sub> ]-       | 0.93 | 1.58 | 1.02 | 2.08 | 0.51  | 0.53  | 0.43  | 0.65  |
| [SCN]-                    | 0.54 | 0.91 | 0.70 | 1.54 | 0.17  | 0.15  | 0.05  | 0.23  |
| [PhS]-                    | 0.40 | 0.89 | 0.51 | 1.16 | 0.13  | 0.15  | 0.05  | 0.26  |
| [TFMSM]-                  | 0.32 | 0.61 | 0.25 | 0.56 | 0.25  | 0.29  | 0.27  | 0.37  |
| [TCN]-                    | 0.30 | 1.04 | 0.29 | 1.14 | 0.08  | 0.13  | 0.02  | 0.29  |
| [DBPO <sub>4</sub> ]-     | 0.30 | 0.64 | 0.40 | 0.78 | 0.08  | 0.10  | 0.03  | 0.18  |
| [DEPO <sub>4</sub> ]-     | 0.39 | 0.76 | 0.55 | 1.04 | 0.10  | 0.11  | 0.02  | 0.19  |
| [DIsoPrPO <sub>4</sub> ]- | 0.37 | 0.75 | 0.49 | 0.94 | 0.12  | 0.15  | 0.06  | 0.23  |
| [DMPO <sub>4</sub> ]-     | 0.42 | 0.70 | 0.63 | 1.15 | 0.10  | 0.08  | -0.01 | 0.14  |
| [22-(ME)OHES]-            | 0.50 | 0.93 | 0.57 | 1.09 | 0.26  | 0.30  | 0.22  | 0.40  |
| [BzS]-                    | 0.49 | 0.93 | 0.60 | 1.22 | 0.22  | 0.24  | 0.14  | 0.34  |
| [EtSO <sub>4</sub> ]-     | 0.58 | 1.01 | 0.72 | 1.37 | 0.26  | 0.27  | 0.18  | 0.36  |

|                                     |      |      |      |      |      |       |       |       |
|-------------------------------------|------|------|------|------|------|-------|-------|-------|
| [HSO <sub>3</sub> ]-                | 0.38 | 0.77 | 0.51 | 0.98 | 0.11 | 0.13  | 0.05  | 0.22  |
| [HSO <sub>4</sub> ]-                | 1.11 | 1.33 | 1.31 | 2.00 | 0.72 | 0.71  | 0.61  | 0.76  |
| [MetA]-                             | 0.85 | 1.33 | 0.94 | 1.59 | 0.58 | 0.62  | 0.51  | 0.73  |
| [MeSO <sub>4</sub> ]-               | 0.62 | 0.96 | 0.80 | 1.47 | 0.27 | 0.26  | 0.17  | 0.33  |
| [MeSO <sub>3</sub> ]-               | 0.38 | 0.36 | 0.69 | 1.10 | 0.01 | -0.06 | -0.13 | -0.06 |
| [F <sub>9</sub> BSO <sub>3</sub> ]- | 0.49 | 0.97 | 0.47 | 1.01 | 0.34 | 0.41  | 0.35  | 0.53  |
| [OctSO <sub>3</sub> ]-              | 0.32 | 0.69 | 0.43 | 0.83 | 0.09 | 0.11  | 0.03  | 0.20  |
| [NH <sub>2</sub> SO <sub>3</sub> ]- | 0.67 | 0.47 | 1.00 | 1.35 | 0.31 | 0.23  | 0.17  | 0.20  |
| [Tau]-                              | 0.56 | 0.69 | 0.80 | 1.25 | 0.22 | 0.19  | 0.11  | 0.21  |
| [Tosy]-                             | 0.41 | 0.83 | 0.52 | 1.09 | 0.16 | 0.18  | 0.09  | 0.28  |
| [CF <sub>3</sub> SO <sub>3</sub> ]- | 0.74 | 1.50 | 0.74 | 1.62 | 0.47 | 0.54  | 0.44  | 0.70  |

**Table S3 (continued...):** COSMO-RS predicted logarithmic activity coefficients of PET in different ILs at 363.15 K

|          | [DMPH]+ | [DBNH]+ | [DMANH]+ | [DBUH]+ | [TBDH]+ | [TMGH]+ | [PeMPipH]+ | [DMAAH]+ |
|----------|---------|---------|----------|---------|---------|---------|------------|----------|
| [Ala]-   | 0.54    | 0.49    | 0.56     | 0.55    | 0.91    | 0.84    | 1.53       | 1.28     |
| [Arg]-   | 1.05    | 0.98    | 0.79     | 0.91    | 1.20    | 1.19    | 1.62       | 1.37     |
| [Aspg]-  | 1.02    | 0.98    | 0.93     | 0.99    | 1.35    | 1.28    | 1.86       | 1.60     |
| [Cyst]-  | 0.77    | 0.68    | 0.59     | 0.62    | 0.96    | 0.95    | 1.50       | 1.18     |
| [Glumn]- | 1.02    | 0.95    | 0.82     | 0.91    | 1.24    | 1.21    | 1.71       | 1.45     |
| [Gly]-   | 0.16    | 0.18    | 0.52     | 0.39    | 0.75    | 0.60    | 1.46       | 1.28     |
| [His]-   | 1.30    | 1.20    | 0.92     | 1.07    | 1.41    | 1.42    | 1.83       | 1.50     |
| [Isole]- | 0.81    | 0.72    | 0.50     | 0.63    | 0.94    | 0.95    | 1.41       | 1.10     |
| [Leu]-   | 0.83    | 0.73    | 0.49     | 0.63    | 0.93    | 0.95    | 1.39       | 1.07     |
| [Lys]-   | 0.76    | 0.68    | 0.52     | 0.61    | 0.90    | 0.90    | 1.38       | 1.11     |
| [Met]-   | 0.73    | 0.63    | 0.46     | 0.53    | 0.83    | 0.85    | 1.30       | 0.99     |
| [Phe]-   | 0.81    | 0.71    | 0.45     | 0.57    | 0.87    | 0.90    | 1.27       | 0.94     |
| [Pro]-   | 0.62    | 0.54    | 0.50     | 0.53    | 0.86    | 0.84    | 1.43       | 1.16     |

|                              |      |      |      |      |      |      |      |      |
|------------------------------|------|------|------|------|------|------|------|------|
| [AspMA]-                     | 1.44 | 1.35 | 1.05 | 1.25 | 1.63 | 1.62 | 2.06 | 1.74 |
| [GluMA]-                     | 1.43 | 1.34 | 1.00 | 1.21 | 1.57 | 1.57 | 1.96 | 1.64 |
| [Ser]-                       | 0.97 | 0.94 | 0.92 | 0.99 | 1.37 | 1.28 | 1.92 | 1.67 |
| [Thr]-                       | 0.83 | 0.75 | 0.61 | 0.70 | 1.04 | 1.02 | 1.59 | 1.26 |
| [Try]-                       | 1.11 | 1.01 | 0.64 | 0.83 | 1.11 | 1.15 | 1.42 | 1.08 |
| [Tyro]-                      | 1.41 | 1.30 | 0.88 | 1.12 | 1.44 | 1.47 | 1.75 | 1.41 |
| [Val]-                       | 0.85 | 0.75 | 0.55 | 0.67 | 1.00 | 1.00 | 1.50 | 1.17 |
| [2Alm]-                      | 0.49 | 0.46 | 0.59 | 0.54 | 0.90 | 0.80 | 1.57 | 1.31 |
| [2MIm]-                      | 0.81 | 0.71 | 0.55 | 0.62 | 0.99 | 0.98 | 1.57 | 1.20 |
| [45DCIm]-                    | 1.26 | 1.08 | 0.48 | 0.74 | 1.02 | 1.16 | 1.46 | 0.90 |
| [56DMBeIm]-                  | 0.81 | 0.69 | 0.36 | 0.51 | 0.79 | 0.84 | 1.20 | 0.83 |
| [BeIm]-                      | 1.01 | 0.87 | 0.50 | 0.65 | 0.98 | 1.04 | 1.44 | 1.01 |
| [Sac]-                       | 1.11 | 0.97 | 0.62 | 0.76 | 1.09 | 1.15 | 1.49 | 1.08 |
| [2-Mbut]-                    | 0.64 | 0.55 | 0.49 | 0.52 | 0.88 | 0.86 | 1.40 | 1.11 |
| [2-BrMAcr]-                  | 0.88 | 0.74 | 0.50 | 0.57 | 0.93 | 0.97 | 1.37 | 0.97 |
| [2-BOA]-                     | 0.57 | 0.50 | 0.31 | 0.45 | 0.69 | 0.69 | 1.03 | 0.81 |
| [2-ClAce]-                   | 0.74 | 0.68 | 0.66 | 0.69 | 1.09 | 1.02 | 1.69 | 1.36 |
| [2-EBA]-                     | 0.73 | 0.64 | 0.48 | 0.58 | 0.91 | 0.90 | 1.38 | 1.09 |
| [2-EHA]-                     | 0.70 | 0.62 | 0.41 | 0.54 | 0.83 | 0.83 | 1.24 | 0.97 |
| [2-HOA]-                     | 0.49 | 0.43 | 0.24 | 0.38 | 0.60 | 0.59 | 0.89 | 0.69 |
| [2-(OH)MAcr]-                | 0.89 | 0.79 | 0.63 | 0.72 | 1.09 | 1.08 | 1.62 | 1.26 |
| [22-DMB]-                    | 0.78 | 0.69 | 0.50 | 0.62 | 0.95 | 0.95 | 1.42 | 1.12 |
| [3-(OH) <sub>2</sub> -MBut]- | 1.22 | 1.13 | 0.85 | 1.03 | 1.40 | 1.39 | 1.84 | 1.50 |
| [4-EOA]-                     | 0.62 | 0.54 | 0.35 | 0.47 | 0.73 | 0.74 | 1.12 | 0.87 |
| [Abt]-                       | 0.46 | 0.40 | 0.20 | 0.35 | 0.56 | 0.55 | 0.82 | 0.62 |
| [Ace]-                       | 0.01 | 0.04 | 0.47 | 0.31 | 0.69 | 0.51 | 1.40 | 1.24 |
| [AceSal]-                    | 0.88 | 0.77 | 0.51 | 0.63 | 0.94 | 0.97 | 1.33 | 0.98 |
| [Acryl]-                     | 0.40 | 0.37 | 0.54 | 0.48 | 0.87 | 0.76 | 1.50 | 1.24 |
| [Benzoate]-                  | 0.80 | 0.69 | 0.51 | 0.59 | 0.95 | 0.95 | 1.41 | 1.06 |

|                         |       |       |      |      |      |      |      |      |
|-------------------------|-------|-------|------|------|------|------|------|------|
| [But]-                  | 0.58  | 0.52  | 0.51 | 0.54 | 0.89 | 0.85 | 1.46 | 1.19 |
| [C3C]-                  | 0.88  | 0.77  | 0.55 | 0.64 | 0.96 | 0.98 | 1.34 | 1.01 |
| [Crotonate]-            | 0.45  | 0.40  | 0.48 | 0.45 | 0.81 | 0.75 | 1.40 | 1.14 |
| [Dec]-                  | 0.61  | 0.53  | 0.34 | 0.46 | 0.71 | 0.73 | 1.10 | 0.86 |
| [For]-                  | -0.45 | -0.32 | 0.46 | 0.16 | 0.55 | 0.24 | 1.37 | 1.29 |
| [Gen]-                  | 1.87  | 1.78  | 1.40 | 1.65 | 2.06 | 2.04 | 2.38 | 2.07 |
| [Glyco]-                | 0.15  | 0.24  | 0.75 | 0.60 | 0.99 | 0.72 | 1.63 | 1.57 |
| [Hex]-                  | 0.69  | 0.60  | 0.46 | 0.55 | 0.86 | 0.86 | 1.35 | 1.07 |
| [Im2C]-                 | 0.58  | 0.54  | 0.64 | 0.60 | 0.98 | 0.89 | 1.53 | 1.28 |
| [I3A]-                  | 1.13  | 1.02  | 0.68 | 0.86 | 1.17 | 1.20 | 1.50 | 1.17 |
| [Lac]-                  | 0.50  | 0.51  | 0.74 | 0.70 | 1.08 | 0.92 | 1.66 | 1.51 |
| [MCb]-                  | 0.37  | 0.36  | 0.57 | 0.49 | 0.88 | 0.76 | 1.56 | 1.31 |
| [N-MCb]-                | 0.11  | 0.12  | 0.47 | 0.33 | 0.69 | 0.55 | 1.39 | 1.22 |
| [NMeO]-                 | 0.46  | 0.41  | 0.53 | 0.47 | 0.83 | 0.76 | 1.44 | 1.17 |
| [Oct]-                  | 0.67  | 0.58  | 0.40 | 0.52 | 0.79 | 0.80 | 1.22 | 0.96 |
| [Oxa]-                  | 0.55  | 0.57  | 0.80 | 0.73 | 1.13 | 0.98 | 1.76 | 1.53 |
| [Prop]-                 | 0.42  | 0.39  | 0.52 | 0.49 | 0.86 | 0.78 | 1.49 | 1.25 |
| [Sal]-                  | 1.24  | 1.16  | 0.97 | 1.09 | 1.48 | 1.44 | 1.89 | 1.60 |
| [ThioSal]-              | 0.88  | 0.76  | 0.52 | 0.60 | 0.94 | 0.97 | 1.36 | 0.99 |
| [TFA]-                  | 1.35  | 1.20  | 0.70 | 0.96 | 1.36 | 1.42 | 1.87 | 1.33 |
| [TSAC]-                 | 0.80  | 0.72  | 0.22 | 0.49 | 0.58 | 0.71 | 0.84 | 0.42 |
| [B(F <sub>5</sub> )SI]- | 0.45  | 0.40  | 0.05 | 0.27 | 0.33 | 0.37 | 0.55 | 0.25 |
| [MSA]-                  | 1.10  | 0.99  | 0.72 | 0.83 | 1.17 | 1.20 | 1.65 | 1.27 |
| [TFMI]                  | 0.84  | 0.75  | 0.25 | 0.52 | 0.61 | 0.75 | 0.84 | 0.44 |
| [DCN]-                  | 1.13  | 0.95  | 0.62 | 0.70 | 1.12 | 1.20 | 1.75 | 1.19 |
| [SbF <sub>6</sub> ]-    | 1.61  | 1.39  | 0.51 | 0.91 | 1.09 | 1.40 | 1.52 | 0.79 |
| [PF <sub>6</sub> ]-     | 1.95  | 1.69  | 0.74 | 1.15 | 1.44 | 1.77 | 1.91 | 1.13 |
| [NO <sub>3</sub> ]-     | 0.46  | 0.50  | 0.80 | 0.70 | 1.13 | 0.96 | 1.89 | 1.59 |
| [WOF <sub>5</sub> ]-    | 1.80  | 1.56  | 0.64 | 1.05 | 1.30 | 1.60 | 1.72 | 0.99 |



|                                     |      |      |      |      |      |      |      |      |
|-------------------------------------|------|------|------|------|------|------|------|------|
| [Phenolate]-                        | 0.93 | 0.82 | 0.56 | 0.69 | 1.05 | 1.06 | 1.54 | 1.15 |
| [BF <sub>4</sub> ]-                 | 1.50 | 1.36 | 0.98 | 1.15 | 1.58 | 1.67 | 2.28 | 1.64 |
| [SCN]-                              | 0.92 | 0.82 | 0.71 | 0.72 | 1.14 | 1.14 | 1.84 | 1.36 |
| [PhS]-                              | 0.93 | 0.80 | 0.50 | 0.61 | 0.95 | 1.00 | 1.46 | 1.05 |
| [TFMSM]-                            | 0.59 | 0.54 | 0.16 | 0.38 | 0.40 | 0.52 | 0.55 | 0.26 |
| [TCN]-                              | 1.10 | 0.87 | 0.38 | 0.50 | 0.79 | 0.98 | 1.29 | 0.69 |
| [DBPO <sub>4</sub> ]-               | 0.64 | 0.56 | 0.33 | 0.46 | 0.70 | 0.72 | 1.07 | 0.80 |
| [DEPO <sub>4</sub> ]-               | 0.75 | 0.66 | 0.48 | 0.57 | 0.87 | 0.89 | 1.36 | 1.05 |
| [DIsoPrPO <sub>4</sub> ]-           | 0.76 | 0.66 | 0.42 | 0.55 | 0.83 | 0.85 | 1.25 | 0.95 |
| [DMPO <sub>4</sub> ]-               | 0.70 | 0.62 | 0.57 | 0.60 | 0.95 | 0.92 | 1.51 | 1.20 |
| [22-(ME)OHES]-                      | 0.94 | 0.84 | 0.51 | 0.67 | 0.92 | 0.97 | 1.29 | 0.95 |
| [BzS]-                              | 0.97 | 0.85 | 0.59 | 0.69 | 1.03 | 1.07 | 1.49 | 1.10 |
| [EtSO <sub>4</sub> ]-               | 1.01 | 0.90 | 0.66 | 0.77 | 1.12 | 1.15 | 1.66 | 1.26 |
| [HSO <sub>3</sub> ]-                | 0.76 | 0.66 | 0.43 | 0.55 | 0.82 | 0.85 | 1.28 | 0.97 |
| [HSO <sub>4</sub> ]-                | 1.34 | 1.32 | 1.23 | 1.34 | 1.80 | 1.72 | 2.42 | 2.06 |
| [MetA]-                             | 1.38 | 1.26 | 0.92 | 1.08 | 1.43 | 1.47 | 1.86 | 1.47 |
| [MeSO <sub>4</sub> ]-               | 0.96 | 0.87 | 0.75 | 0.81 | 1.19 | 1.18 | 1.79 | 1.40 |
| [MeSO <sub>3</sub> ]-               | 0.35 | 0.35 | 0.60 | 0.50 | 0.87 | 0.75 | 1.58 | 1.34 |
| [F <sub>9</sub> BSO <sub>3</sub> ]- | 1.01 | 0.91 | 0.38 | 0.69 | 0.90 | 0.97 | 1.16 | 0.76 |
| [OctSO <sub>3</sub> ]-              | 0.68 | 0.59 | 0.35 | 0.48 | 0.72 | 0.75 | 1.12 | 0.83 |
| [NH <sub>2</sub> SO <sub>3</sub> ]- | 0.48 | 0.54 | 0.90 | 0.80 | 1.20 | 0.98 | 1.90 | 1.72 |
| [Tau]-                              | 0.68 | 0.65 | 0.71 | 0.70 | 1.05 | 0.97 | 1.66 | 1.41 |
| [Tosy]-                             | 0.86 | 0.75 | 0.50 | 0.60 | 0.91 | 0.95 | 1.35 | 0.98 |
| [CF <sub>3</sub> SO <sub>3</sub> ]- | 1.53 | 1.35 | 0.68 | 1.01 | 1.35 | 1.50 | 1.78 | 1.20 |

**Table S3:** Correlation between experimental and COSMO-RS predicted viscosities ( $\eta$ ) of ionic liquids.

| Cation                      | Anion                             | T (K)  | $\eta_{exp}$<br>(cP) | $\eta_{pred}$<br>(cP) |
|-----------------------------|-----------------------------------|--------|----------------------|-----------------------|
| 1-butyl-3-methylimidazolium | Bis(trifluoromethylsulfonyl)imide | 298.15 | 51.6                 | 51.7                  |
| 1-butyl-3-methylimidazolium | triflate                          | 298.15 | 84.4                 | 59.0                  |
| 1-ethyl-3-methylimidazolium | Bis(trifluoromethylsulfonyl)imide | 298.15 | 33.0                 | 33.7                  |
| 1-ethyl-3-methylimidazolium | hexafluorophosphate               | 353.15 | 17.1                 | 16.0                  |
| 1-ethyl-3-methylimidazolium | thiocyanate                       | 298.15 | 22.7                 | 20.5                  |
| 1-ethyl-3-methylimidazolium | ethylsulfate                      | 298.15 | 97.8                 | 105.6                 |
| 1-ethyl-3-methylimidazolium | methylsulfate                     | 298.15 | 67.1                 | 70.9                  |
| 1-ethyl-3-methylimidazolium | triflate                          | 298.15 | 42.9                 | 40.1                  |
| 1-butyl-3-methylpyridinium  | Bis(trifluoromethylsulfonyl)imide | 298.15 | 64.7                 | 53.8                  |
| 1-butyl-3-methylpyridinium  | tetrafluoroborate                 | 298.15 | 176.9                | 157.0                 |
| 1-ethyl-3-methylimidazolium | acetate                           | 298.15 | 128.5                | 101.7                 |

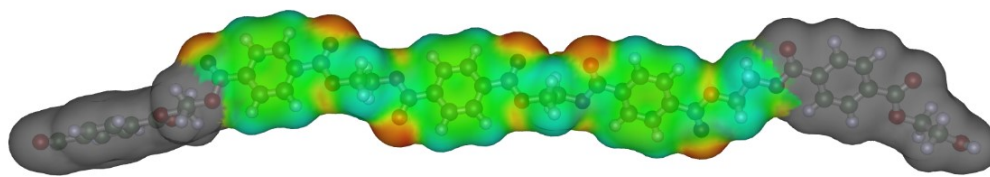

Polyethylene Terephthalate (PET)

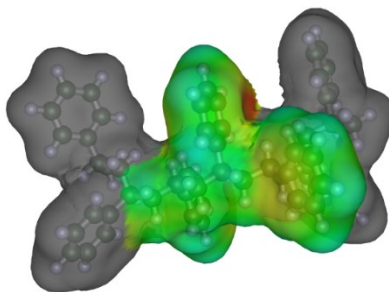

Polystyrene (PS)

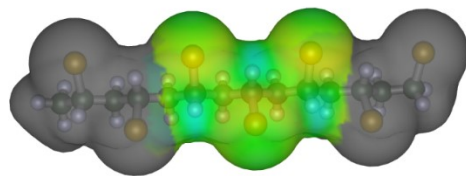

Polyvinylchloride (PVC)

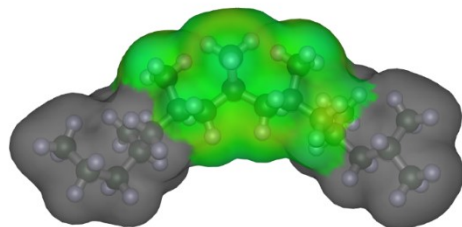

Polypropylene (PP)

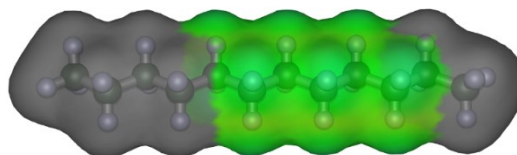

Polyethylene (PE)

**Figure S1:** Chemical Structures and COSMO cavities of plastic molecules. In the COSMO cavity (charge distribution), red, blue, and green colors represent the negative, positive, and neutral charge on the surface of the molecule, respectively.

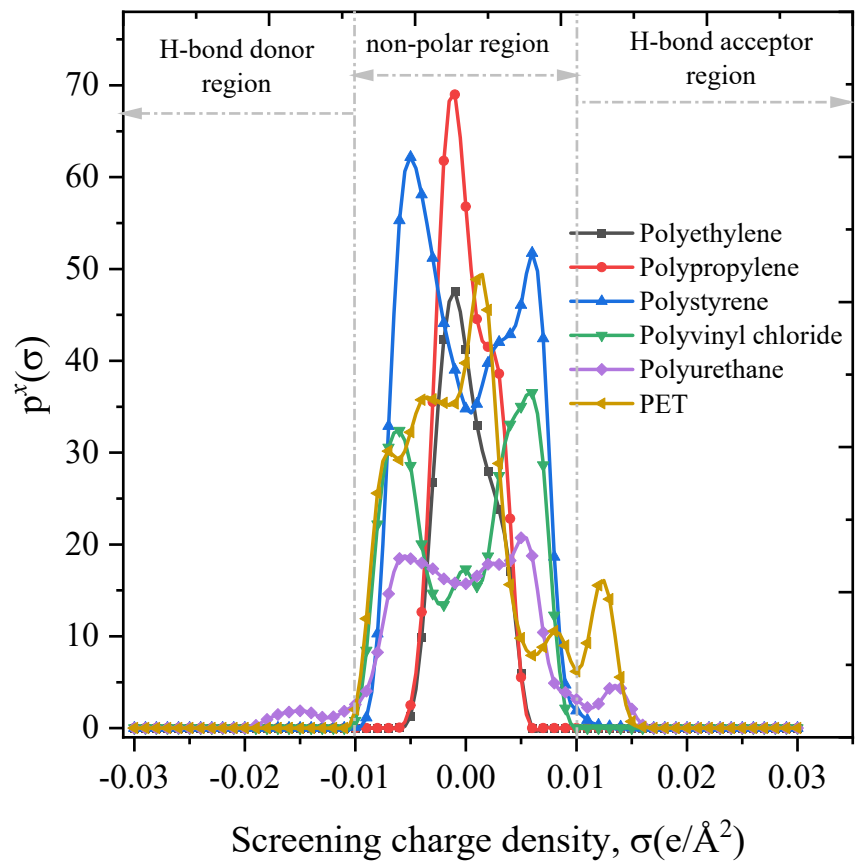

**Figure S2:** Sigma profiles of different plastics predicted by COSMO-RS
